# Supplementary material
Source: PubMed Central journal article supplement (PMC6233645)
Supplement: jama-320-1131-s001.pdf [file jama-320-1131-s001.pdf]

## Supplementary Online Content

Rotenstein LS, Torre M, Ramos MA, et al. Prevalence of Burnout Among Physicians: A Systematic Review. *JAMA*. doi:10.1001/jama.2018.12777

**eAppendix 1.** Search Strategy Used in this Systematic Review

**eAppendix 2.** Modified Newcastle-Ottawa Risk-of-Bias Scoring Guide

**eAppendix 3.** Study Protocol

**eAppendix 4.** Statistical Methods Used to Conduct the Meta-analyses

**eAppendix 5.** Sample Items from the Maslach Burnout Inventory Assessment Forms

**eTable 1.** Selected Characteristics of the 182 Studies Included in this Systematic Review

**eTable 2.** Summary of the Countries and Continents or Regions in Which Studies Were Conducted

**eTable 3.** Newcastle-Ottawa Risk-of-Bias Scores of the 182 Studies Included in this Systematic Review

**eTable 4.** Summary of the Newcastle-Ottawa Risk-of-Bias Scores of the Studies

**eTable 5.** Summary of the Depression Screening Instruments Used by the Studies

**eTable 6.** Meta-analysis of the Prevalence of Overall Burnout

**eTable 7.** Meta-analysis of the Prevalence of Overall Burnout Stratified by Assessment Method

**eTable 8.** Assessment Tools and Cutoff Scores for Defining Burnout or Burnout Subcomponent Prevalence Used by the Studies

**eTable 9.** Meta-analysis of the Prevalence of Emotional Exhaustion

**eTable 10.** Meta-analysis of the Prevalence of Emotional Exhaustion Stratified by Assessment Method

**eTable 11.** Meta-analysis of the Prevalence of Depersonalization

**eTable 12.** Meta-analysis of the Prevalence of Depersonalization Stratified by Assessment Method

**eTable 13.** Meta-analysis of the Prevalence of a Diminished Sense of Personal Accomplishment

**eTable 14.** Meta-analysis of the Prevalence of a Diminished Sense of Personal Accomplishment Stratified by Assessment Method

**eTable 15.** Meta-analysis of the Prevalence of Overall Burnout Stratified by Country and Continent or Region

**eTable 16.** Meta-analysis of the Prevalence of Emotional Exhaustion Stratified by Country and Continent or Region

**eTable 17.** Meta-analysis of the Prevalence of Depersonalization Stratified by Country and Continent or Region

**eTable 18.** Meta-analysis of the Prevalence of a Diminished Sense of Personal Accomplishment Stratified by Country and Continent or Region

**eTable 19.** Meta-analysis of the Prevalence of Overall Burnout Stratified by Specialty

**eTable 20.** Meta-analysis of the Prevalence of Emotional Exhaustion Stratified by Specialty

**eTable 21.** Meta-analysis of the Prevalence of Depersonalization Stratified by Specialty

**eTable 22.** Meta-analysis of the Prevalence of a Diminished Sense of Personal Accomplishment Stratified by Specialty

**eTable 23.** Associations Between Overall Burnout or Burnout Subcomponent Prevalence with Survey Year, Age, and Sex

**eTable 24.** Meta-analysis of the Prevalence of Screening Positive for Depression

**eTable 25.** Meta-analysis of the Prevalence of Screening Positive for Depression Stratified by Assessment Method

**eTable 26.** Correlation Coefficients Between Overall Burnout or Burnout Subcomponent Prevalence and Screening Positive for Depression

**eTable 27.** Within-Instrument Heterogeneity Analyses of Studies Reporting on Burnout or Burnout Subcomponent Prevalence

**eFigure.** Assessment of Small Study Effects by Funnel Plot

## **eReferences**

This supplementary material has been provided by the authors to give readers additional information about their work.

**eAppendix 1. Search Strategy Used in this Systematic Review**

**MEDLINE/PubMed**

| Searches                                                                                                                                                                                                                                                                                                                                                                                                                                                                                                                                                                                                                                                                                                                                                                                                                                                                                                                                                                                                                                                                                                    | Results     | Type            |
|-------------------------------------------------------------------------------------------------------------------------------------------------------------------------------------------------------------------------------------------------------------------------------------------------------------------------------------------------------------------------------------------------------------------------------------------------------------------------------------------------------------------------------------------------------------------------------------------------------------------------------------------------------------------------------------------------------------------------------------------------------------------------------------------------------------------------------------------------------------------------------------------------------------------------------------------------------------------------------------------------------------------------------------------------------------------------------------------------------------|-------------|-----------------|
| <p>(burnout OR "burned out" OR depersonalization or "emotional exhaustion" or burnout, professional [MESH] or emotional stress [MESH] or psychological stress [MESH] or stress, psychological [MESH] OR compassion fatigue [MESH])</p> <p>AND</p> <p>("attending physician" OR physician or physicians [MESH] OR doctor or medical staff, hospital [MESH] OR physicians, primary care [MESH] or osteopathic physician [MESH])</p> <p>AND</p> <p>((Cohort design) OR (Cohort stud*) OR (Cohort studies [MeSH]) OR (Cross-sectional analysis) OR (Cross-sectional design) OR (Cross-sectional stud*) OR (Cross-sectional studies [MeSH]) OR (Epidemiologic stud*) OR (Epidemiologic studies [MeSH]) OR (Incidence) OR (Longitudinal design) OR (Longitudinal stud*) OR (Meta-analy*) OR (Meta-analysis [Publication Type]) OR (Observational stud*) OR (Population stud*) OR (Prevalence) OR (Prospective design) OR (Prospective stud*) OR (Prospective studies [MeSH]) OR (Retrospective design) OR (Retrospective stud*) OR (Retrospective studies [MeSH]) OR (Review) OR (Review [Publication Type]))</p> | <p>3524</p> | <p>Advanced</p> |

**ERIC/psycARTICLES/psycINFO**

| <b>Searches</b>                                                                                                                                                                                                                                                                                                                                                                                                                                                                                                                                                                                                                                                                                                                                                                                                                                                                                                                                                                                                                                                                             | <b>Results</b> | <b>Type</b>     |
|---------------------------------------------------------------------------------------------------------------------------------------------------------------------------------------------------------------------------------------------------------------------------------------------------------------------------------------------------------------------------------------------------------------------------------------------------------------------------------------------------------------------------------------------------------------------------------------------------------------------------------------------------------------------------------------------------------------------------------------------------------------------------------------------------------------------------------------------------------------------------------------------------------------------------------------------------------------------------------------------------------------------------------------------------------------------------------------------|----------------|-----------------|
| <p>(burnout OR "burned out" OR<br/>depersonalization or "emotional<br/>exhaustion" or burnout,<br/>professional or emotional stress<br/>or psychological stress or stress,<br/>psychological OR compassion<br/>fatigue)</p> <p>AND</p> <p>("attending physician" OR<br/>physician or physicians OR<br/>doctor or medical staff, hospital<br/>OR physicians, primary care or<br/>osteopathic physician)</p> <p>AND</p> <p>((Cohort design) OR<br/>(Cohort stud*) OR<br/>(Cohort studies) OR<br/>(Cross-sectional analysis) OR<br/>(Cross-sectional design) OR<br/>(Cross-sectional stud*) OR<br/>(Cross-sectional studies) OR<br/>(Epidemiologic stud*) OR<br/>(Epidemiologic studies) OR<br/>(Incidence) OR<br/>(Longitudinal design) OR<br/>(Longitudinal stud*) OR<br/>(Meta-analy*) OR<br/>(Meta-analysis) OR<br/>(Observational stud*) OR<br/>(Population stud*) OR<br/>(Prevalence) OR<br/>(Prospective design) OR<br/>(Prospective stud*) OR<br/>(Prospective studies) OR<br/>(Retrospective design) OR<br/>(Retrospective stud*) OR<br/>(Retrospective studies) OR<br/>(Review))</p> | <p>964</p>     | <p>Advanced</p> |

**Embase**

| Searches                                                                                                                                                                                                                                                                                                                                                                                                                                                                                                                                                                                                                                                                                                                                                                                                                                                                                                                                                  | Results   | Type            |
|-----------------------------------------------------------------------------------------------------------------------------------------------------------------------------------------------------------------------------------------------------------------------------------------------------------------------------------------------------------------------------------------------------------------------------------------------------------------------------------------------------------------------------------------------------------------------------------------------------------------------------------------------------------------------------------------------------------------------------------------------------------------------------------------------------------------------------------------------------------------------------------------------------------------------------------------------------------|-----------|-----------------|
| <p>(burnout OR "burned out" OR depersonalization or "emotional exhaustion" or burnout, professional or emotional stress or psychological stress or stress, psychological OR "compassion fatigue")</p> <p>AND</p> <p>("attending physician" OR physician or physicians OR doctor or medical staff, hospital OR physicians, primary care or osteopathic physician)</p> <p>AND</p> <p>((Cohort design) OR (Cohort stud*) OR (Cohort studies) OR (Cross-sectional analysis) OR (Cross-sectional design) OR (Cross-sectional stud*) OR (Cross-sectional studies) OR (Epidemiologic stud*) OR (Epidemiologic studies) OR (Incidence) OR (Longitudinal design) OR (Longitudinal stud*) OR (Meta-analy*) OR (Meta-analysis) OR (Observational stud*) OR (Population stud*) OR (Prevalence) OR (Prospective design) OR (Prospective stud*) OR (Prospective studies) OR (Retrospective design) OR (Retrospective stud*) OR (Retrospective studies) OR (Review))</p> | <p>96</p> | <p>Advanced</p> |

**Legend:** MeSH, Medical Subject Heading in MEDLINE.

## **eAppendix 2.** Modified Newcastle-Ottawa risk-of-bias scoring guide

### **(1) Representativeness of the sample:**

- 1 point: Population contained multiple specialties at multiple institutions.
- 0 points: Population contained either a single specialty, a single institution, or both.

### **(2) Sample size:**

- 1 point: Sample size was  $\geq 300$  participants.
- 0 points: Sample size was  $< 300$  participants.

### **(3) Non-respondents:**

- 1 point: Comparability between respondent and non-respondent characteristics was established, or the response “rate” was 95% or greater.
- 0 points: The comparability between respondents and non-respondents was unsatisfactory, the response “rate” was unsatisfactory, or there was no description of the response “rate” or the characteristics of the responders or non-responders.

### **(4) Ascertainment of burnout:**

- 1 point: Well described and/or validated measurement tool, *e.g.*, the MBI.
- 0 points: Poorly described measurement tool of uncertain validity or non-validated single-question screening tool.

### **(5) Quality of descriptive statistics reporting:**

- 1 point: Reported descriptive statistics to describe the population (*e.g.*, age, sex) with proper measures of dispersion (*e.g.*, mean, standard deviation).
- 0 points: Descriptive statistics were not reported, were incomplete, or did not include proper measures of dispersion.

**Note:** This scale assesses quality in several domains: sample representativeness and size, comparability between respondents and non-respondents, ascertainment of burnout, and statistical reporting quality.

## eAppendix 3. Study Protocol

1. Review Question
  - a. To characterize the methods used to assess the prevalence of symptoms of burnout among practicing physicians worldwide by systematic review.
  - b. To estimate prevalence in this population by meta-analysis (if possible) or systematic review alone (if studies not combinable).
2. Search Strategy
  - a. Search of EMBASE, ERIC, MEDLINE/PubMed, psycARTICLES, and psycINFO without language restriction for studies on the prevalence of symptoms of burnout in practicing physicians (*i.e.*, excluding medical students and resident physicians) published before June 1st, 2018.
  - b. Scanning of the reference lists of studies to identify additional relevant publications.
3. Condition or Domain Being Studied
  - a. The condition of interest is burnout. Burnout is a term used to characterize the psychological response to job-related stress and has been used to characterize the stress of medical practice. It is typically considered to consist of feelings of exhaustion, depersonalization or cynicism, and a low sense of personal accomplishment or professional efficacy.
4. Participants/Population
  - a. This review examines burnout among practicing physicians. It explicitly excludes trainees, including medical students, resident physicians, and fellows. It also excludes other health professionals such as dentists, nurses, pharmacists, and physician assistants.
5. Interventions/Exposures
  - a. This review examines burnout in the setting of exposure to the medical practice environment. If an included study assessed burnout before or after an intervention, pre-intervention data were extracted if possible.
6. Comparators/Controls
  - a. Not applicable.
7. Types of Studies Included
  - a. Cross-sectional and longitudinal studies reporting extractable prevalence estimates of burnout were included. Studies had to specifically provide a burnout prevalence estimate in practicing physicians only, or the prevalence had to be deducible based on the presented data. Studies did not have to consider burnout the primary outcome of interest for inclusion in this review.
8. Main Outcomes
  - a. Prevalence of burnout assessed by questionnaire.
  - b. The prevalence estimates of participants meeting criteria for overall burnout (as defined by each study) were extracted. For studies reporting subscale scores, the prevalence estimates of participants meeting cutoff scores for each subscale were also extracted.
9. Additional Outcomes
  - a. If studies reported prevalence estimates of individuals screening positive for major depression, these values were also recorded.

## 10. Data Extraction and Coding

- a. Three authors independently conducted the computer-based literature searches and scanned the reference lists of identified articles.
- b. Three authors independently extracted the following data from each article using a standardized data extraction form: study design; geographic location; year(s) of survey; sample size; specialty; average age of participants; number and percentage of male and female participants; diagnostic or screening method used; outcome definition (*i.e.*, specific diagnostic criteria or screening instrument cutoff); and reported prevalence estimates of overall burnout, its subcomponents emotional exhaustion, depersonalization, and a low sense of personal accomplishment, or both. Depressive symptom prevalence was also recorded if reported.
- c. If the total number of physicians assessed for a specific burnout measure differed from the total number in the study (*e.g.*, due to missing data), the former number was utilized for calculating prevalence estimates (*i.e.*, the prevalence estimates calculated in this review may differ slightly from the estimates reported in the studies themselves). If only the prevalence value (*i.e.*, the percent prevalence) and the total number of physicians (*i.e.*, the denominator) were reported by a study, the number of physicians experiencing burnout (*i.e.*, the numerator) was inferred accordingly.
- d. Data extraction was verified by the senior author prior to publication.

## 11. Risk of Bias/Quality Assessment

- a. Three authors independently assessed the risk of bias of included studies using a modified version of the Newcastle-Ottawa scale, and the senior author adjudicated discrepancies.

## 12. Strategy for Data Synthesis

- a. The intention of this review was to perform a meta-analysis. After doing so, the pooled quantitative summary estimates were judged to not be reliable. Therefore, the entire body of studies was summarized descriptively, and a qualitative synthesis of a subset of larger studies was performed.

## 13. Analysis of Subgroups or Subsets

- a. Meta-analyses were performed on subgroups of studies reporting emotional exhaustion, depersonalization, personal accomplishment, and overall burnout. Analyses were stratified by specialty, burnout assessment method, depression assessment method, country, and continent or region.



#### **eAppendix 4. Statistical Methods Used to Conduct the Meta-analyses**

Prevalence estimates of burnout and depressive symptoms were calculated by pooling the study-specific estimates using random effects meta-analyses that accounted for between-study heterogeneity.<sup>1</sup> When longitudinal studies reported prevalence estimates made at different time periods within the year, the overall period prevalence was used. Standard  $\chi^2$  tests and the  $I^2$  statistic (*i.e.*, the percentage of variability in prevalence estimates due to heterogeneity rather than sampling error, or chance, with values  $\geq 75\%$  indicating considerable heterogeneity), were used to assess between-study heterogeneity.<sup>2,3</sup> Sensitivity analyses were performed by serially excluding each study to determine the influence of individual studies on the overall prevalence estimates (not shown). Results from studies grouped according to pre-specified study-level characteristics (diagnostic criteria or screening instrument cutoff, country, continent or region, specialty, year of baseline survey, age, and sex) were also compared using stratified meta-analysis and meta-regression.<sup>4,5</sup> Among studies reporting data on both outcomes, correlations between burnout and depressive symptom prevalence estimates were assessed using Pearson correlation analysis. Bias secondary to small study effects was investigated by funnel plot and Egger's test.<sup>6,7</sup> All analyses were performed using R 3.4.2 (R Foundation for Statistical Computing, Vienna, Austria).<sup>8</sup> Statistical tests were 2-sided and used a significance threshold of  $P < 0.05$ .

## **eAppendix 5.** Sample Items from the Maslach Burnout Inventory Assessment Forms

### **A.** MBI-Human Services Survey (MBI-HSS) Form Sample Instructions and Items

The purpose of this survey is to discover how various persons in the human services or helping professions view their job and the people with whom they work closely.

Because persons in a wide variety of occupations will answer this survey, it uses the term recipients to refer to the people for whom you provide your service, care, treatment, or instructions. When answering this survey, please think of these people as recipients of the service you provide, even though you may use another term in your work (*NB*: the word “patients” is commonly used in studies of physician burnout).

Instructions: On the following pages are 22 statements of job-related feelings. Please read each statement carefully and decide if you ever feel this way about your job.

If you have never had this feeling, check the box under the Never column. If you have had this feeling, indicate how often you feel it by selecting the phrase that best describes how frequently you feel that way.

The phrases describing the frequency are:

How often:

Never

A few times a year or less

Once a month or less

A few times a month

Once a week

A few times a week

Every day

**MBI-HSS Sample Items:**

|                                                        | Never | A few times a year or less | Once a month or less | A few times a month | Once a week | A few times a week | Every day |
|--------------------------------------------------------|-------|----------------------------|----------------------|---------------------|-------------|--------------------|-----------|
| I feel emotionally drained from my work                |       |                            |                      |                     |             |                    |           |
| I have accomplished many worthwhile things in this job |       |                            |                      |                     |             |                    |           |
| I don't really care what happens to some recipients    |       |                            |                      |                     |             |                    |           |

**B. MBI-General Survey (MBI-GS) Form Sample Instructions and Items**

The purpose of this survey is to assess how staff members view their job and their reactions to their work.

Instructions: On the following pages are 16 statements of job-related feelings. Please read each statement carefully and decide if you ever feel this way about your job.

If you have never had this feeling, check the box under the Never column. If you have had this feeling, indicate how often you feel it by selecting the phrase that best describes how frequently you feel that way.

The phrases describing the frequency are:

How Often:

Never

A few times a year or less

Once a month or less

A few times a month

Once a week

A few times a week

Every day

MBI-GS Sample Items:

|                                         | Never | A few times a year or less | Once a month or less | A few times a month | Once a week | A few times a week | Every day |
|-----------------------------------------|-------|----------------------------|----------------------|---------------------|-------------|--------------------|-----------|
| I feel emotionally drained from my work |       |                            |                      |                     |             |                    |           |
| In my opinion, I am good at my job      |       |                            |                      |                     |             |                    |           |
| I doubt the significance of my work     |       |                            |                      |                     |             |                    |           |

Reproduced with permission.

MBI-HSS: ©1981 C. Maslach & S.E. Jackson. All rights reserved. Published by Mind Garden, Inc.

MBI-GS: ©1996 W.B. Schaufeli, M.P. Leiter, C. Maslach & S.E. Jackson. All rights reserved. Published by Mind Garden, Inc.

**eTable 1.** Selected Characteristics of the 182 Studies Included in this Systematic Review

| Source                              | Continent | Country                | Survey Years | Specialty             | Total Participants, No. <sup>b</sup> | Age, y <sup>c</sup>      | Men, No. (%) <sup>c</sup> | Burnout Assessment Instrument <sup>d,e</sup> | Emotional Exhaustion Definition <sup>f,g</sup> | Depersonalization Definition <sup>f,g</sup> | Low Personal Accomplishment Definition <sup>f,g</sup> | Overall Burnout Definition <sup>f,g</sup>                                            | Depression Screening Instrument and Definition <sup>e</sup> |
|-------------------------------------|-----------|------------------------|--------------|-----------------------|--------------------------------------|--------------------------|---------------------------|----------------------------------------------|------------------------------------------------|---------------------------------------------|-------------------------------------------------------|--------------------------------------------------------------------------------------|-------------------------------------------------------------|
| Massou, 2013 <sup>9</sup>           | Africa    | Morocco                | 2009         | Intensive Care        | 51                                   | NR                       | NR                        | 22-item MBI-HSS                              | NR                                             | NR                                          | NR                                                    | MBI (Specific Criteria Not Stated)                                                   | NR                                                          |
| Margaryan, 2010 <sup>10</sup>       | Asia      | Armenia                | 2009         | Multiple Specialties  | 130                                  | Mean: 48.9, SD: 11.9     | 14 (10.4)                 | 22-item MBI-HSS                              | EE≥27                                          | DP≥10                                       | PA≤33                                                 | EE≥27 and DP≥10 and PA≤33                                                            | NR                                                          |
| Xiao, 2014 <sup>11</sup>            | Asia      | China                  | 2012         | Emergency Medicine    | 205                                  | NR                       | 125 (61)                  | 15-item Chinese MBI-GS                       | NR                                             | NR                                          | NR                                                    | EX≥14 and/or CY≥10 and/or PE≤17                                                      | HADS≥9                                                      |
| Wu, 2013 <sup>12</sup>              | Asia      | China                  | 2010         | Multiple Specialties  | 1202                                 | Mean: 38.7, SD: 8.8      | 555 (46.2)                | 16-item MBI-GS                               | NR                                             | NR                                          | NR                                                    | EX≥14 and CY≥10 and PE≤17                                                            | NR                                                          |
| Wang, 2014 <sup>13</sup>            | Asia      | China                  | 2008         | Multiple Specialties  | 457                                  | Mean: 39.1, SD: 9.6      | 185 (40.5)                | 19-item Revised Chinese MBI-HSS              | NR                                             | NR                                          | NR                                                    | Score≥4.5                                                                            | NR                                                          |
| Siu, 2012 <sup>14</sup>             | Asia      | China                  | 2009         | Multiple Specialties  | 226                                  | Mean: 37, IQR: 30.5-44.0 | 151 (66.8)                | 22-item MBI-HSS                              | EE≥27                                          | DP≥13                                       | PA≤33                                                 | EE≥27 and DP≥10 and PA≤33                                                            | NR                                                          |
| Li, 2018 <sup>15</sup>              | Asia      | China                  | 2015         | Anesthesia            | 1696                                 | NR                       | NR                        | 22-item MBI-HSS                              | NR                                             | NR                                          | NR                                                    | EE≥27 and/or DP≥13                                                                   | NR                                                          |
| Das, 2016 <sup>16</sup>             | Asia      | India                  | 2014-2015    | Emergency Medicine    | 4                                    | NR                       | NR                        | 22-item MBI-HSS                              | EE≥30                                          | DP≥12                                       | PA≤33                                                 | EE≥30 and MBI≥12 and PA≤33                                                           | NR                                                          |
| Langade, 2016 <sup>17</sup>         | Asia      | India                  | 2014-2016    | Multiple Specialties  | 482                                  | NR                       | 322 (66.8)                | 9-item Abbreviated MBI-HSS                   | EE≥13                                          | DP≥13                                       | PA≤6                                                  | NR                                                                                   | NR                                                          |
| Nishimura, 2014 <sup>18</sup>       | Asia      | Japan                  | 2011         | Multiple Specialties  | 2635                                 | Mean: 47.2               | 2422 (91.9)               | 16-item MBI-GS                               | NR                                             | NR                                          | NR                                                    | EX>4.0 and (CY>2.6 and/or PE<4.17)                                                   | NR                                                          |
| Saijo, 2014 <sup>19</sup>           | Asia      | Japan                  | 2009         | Multiple Specialties  | 488                                  | NR                       | 391 (80.1)                | 16-item MBI-GS                               | NR                                             | NR                                          | NR                                                    | EX>4.2 and (CY>2.4 and/or PE<2.5)                                                    | PHQ-9≥5                                                     |
| Asai, 2007 <sup>20</sup>            | Asia      | Japan                  | 2000         | Multiple Specialties  | 697                                  | Mean: 45, SD: 8.2        | 639 (93.7)                | 22-item MBI-HSS                              | EE≥27                                          | DP≥10                                       | PA≤33                                                 | NR                                                                                   | GHQ-12≥4                                                    |
| Zafar, 2016 <sup>21</sup>           | Asia      | Pakistan               | 2013         | Emergency Medicine    | 170                                  | NR                       | 74 (41.3)                 | 22-item MBI-HSS                              | EE≥30                                          | DP≥12                                       | NR                                                    | NR                                                                                   | GHQ-12≥4                                                    |
| Sadat-Ali, 2005 <sup>22</sup>       | Asia      | Saudi Arabia           | 2003-2004    | Orthopedic Surgery    | 69                                   | Mean: 45.7, SD: 6.8      | NR                        | MBI (Version Not Specified)                  | EE High                                        | DP High                                     | PA Low                                                | NR                                                                                   | NR                                                          |
| See, 2016 <sup>23</sup>             | Asia      | Singapore              | 2013         | Internal Medicine     | 45                                   | NR                       | NR                        | 19-item CBI                                  | Personal Burnout≥50                            | Work-Related Burnout≥50                     | Patient-Related Burnout≥50                            | Personal Burnout≥50 and/or Work-Related Burnout≥50 and/or Patient-Related Burnout≥50 | NR                                                          |
| Chou, 2014 <sup>24</sup>            | Asia      | Taiwan                 | 2012         | Multiple Specialties  | 101                                  | Mean: 45.3, SD: 7.5      | 84 (83.2)                 | 16-item Chinese CBI                          | Personal Burnout≥50                            | Work-Related Burnout≥50                     | Patient-Related Burnout≥50                            | NR                                                                                   | NR                                                          |
| Chen, 2013 <sup>25</sup>            | Asia      | Taiwan                 | 2012         | Multiple Specialties  | 531                                  | NR                       | NR                        | 16-item MBI-GS                               | EX≥3.2                                         | CY>2.2                                      | PE≤4.0                                                | NR                                                                                   | NR                                                          |
| Schooley, 2016 <sup>26</sup>        | Asia      | Turkey                 | 2014         | Emergency Medicine    | 38                                   | NR                       | NR                        | 22-item MBI-HSS                              | EE≥28                                          | DP≥11                                       | PA≤32                                                 | NR                                                                                   | NR                                                          |
| Wurm, 2016 <sup>27</sup>            | Europe    | Austria                | 2010-2011    | Multiple Specialties  | 5897                                 | Mean: 44.4, SD: 10.5     | 3273 (55.5)               | 40-item HBI                                  | NR                                             | NR                                          | NR                                                    | Score≥145                                                                            | MDI≥20                                                      |
| Eelen, 2014 <sup>28</sup>           | Europe    | Belgium                | NR           | Oncology              | 70                                   | NR                       | 40 (51.9)                 | 20-item MBI-UBOS                             | EE High                                        | DP High                                     | PA Low                                                | NR                                                                                   | NR                                                          |
| Vandenbroeck, 2017 <sup>29</sup>    | Europe    | Belgium                | 2012         | Multiple Specialties  | 1169                                 | Mean: 43.5, SD: 10.9     | 617 (52.7)                | 20-item MBI-UBOS                             | EE≥2.5                                         | DP≥1.6 (women)/DP≥1.8 (men)                 | PA≤3.7                                                | EE≥2.5 and DP≥1.6 (women)/DP≥1.8 (men) and PA≤3.7                                    | NR                                                          |
| Selmanovic, 2011 <sup>30</sup>      | Europe    | Bosnia and Herzegovina | 2007         | Multiple Specialties  | 147                                  | NR                       | NR                        | 22-item MBI-HSS                              | EE≥15                                          | DP≥10                                       | PA≤29                                                 | NR                                                                                   | NR                                                          |
| Stanetic, 2013 <sup>31</sup>        | Europe    | Bosnia and Herzegovina | 2010         | Primary Care          | 239                                  | NR                       | 40 (16.7)                 | 22-item MBI-HSS                              | EE≥31                                          | DP≥13                                       | PA≤32                                                 | NR                                                                                   | NR                                                          |
| Ozvacic Adzic Z, 2013 <sup>32</sup> | Europe    | Croatia                | NR           | Family Medicine       | 125                                  | Mean: 46, SD: 7          | 23 (18.4)                 | 22-item MBI-HSS                              | EE≥27                                          | DP≥10                                       | PA≤33                                                 | NR                                                                                   | NR                                                          |
| Pedersen, 2013 <sup>33</sup>        | Europe    | Denmark                | 2004, 2012   | General Practice      | 381                                  | NR                       | 232 (60.9)                | 22-item MBI-HSS                              | EE≥27                                          | DP≥10                                       | PA≤33                                                 | EE≥27 and DP≥10 and PA≤33                                                            | NR                                                          |
| Pedersen, 2016 <sup>34</sup>        | Europe    | Denmark                | 2014         | Multiple Specialties  | 1186                                 | NR                       | 690 (54.6)                | 22-item MBI-HSS                              | EE≥27                                          | DP≥10                                       | PA≤33                                                 | EE≥27 and DP≥10 and PA≤33                                                            | NR                                                          |
| Pedersen, 2018 <sup>35</sup>        | Europe    | Denmark                | 2012         | General Practice      | 588                                  | NR                       | 306 (52.4)                | 22-item MBI-HSS                              | EE≥27                                          | DP≥10                                       | PA≤33                                                 | EE≥27 and/or DP≥10                                                                   | NR                                                          |
| Brondt, 2008 <sup>36</sup>          | Europe    | Denmark                | 2004         | General Practice      | 379                                  | Mean: 51.8, SD: 6.7      | 229 (60.7)                | 22-item MBI-HSS                              | NR                                             | NR                                          | NR                                                    | EE≥27 and DP≥10 and PA≤33                                                            | NR                                                          |
| Lesage, 2013 <sup>37</sup>          | Europe    | France                 | 2011         | Occupational Medicine | 1440                                 | Mean: 52.6               | 418 (29.0)                | 22-item MBI-HSS                              | EE≥27                                          | DP≥10                                       | PA≤31                                                 | EE≥27 and DP≥10 and PA≤33                                                            | NR                                                          |
| Dreano-Hartz, 2015 <sup>38</sup>    | Europe    | France                 | 2012-2013    | Palliative Care       | 309                                  | Mean: 47.2, SD: 9.2      | 101 (32.7)                | 22-item MBI-HSS                              | EE≥30                                          | DP≥12                                       | PA≤38                                                 | NR                                                                                   | NR                                                          |
| Lamothe, 2014 <sup>39</sup>         | Europe    | France                 | NR           | General Practice      | 294                                  | Mean: 51, SD: 9.4        | 151 (51.4)                | 22-item MBI-HSS                              | NR                                             | NR                                          | NR                                                    | MBI Global Mean Score≥30                                                             | NR                                                          |
| Embriaco, 2007 <sup>40</sup>        | Europe    | France                 | 2004         | Intensive Care        | 606                                  | NR                       | 418 (69.0)                | 22-item MBI-HSS                              | NR                                             | NR                                          | NR                                                    | Score≥-8 to ≤34                                                                      | NR                                                          |
| Bohle, 2001 <sup>41</sup>           | Europe    | Germany                | NR           | Urology               | 51                                   | NR                       | NR                        | 22-item MBI-HSS                              | EE High                                        | DP High                                     | PA Low                                                | NR                                                                                   | NR                                                          |
| Richter, 2014 <sup>42</sup>         | Europe    | Germany                | 2007         | Multiple Specialties  | 272                                  | NR                       | 219 (78.8)                | 22-item MBI-HSS                              | EE≥26                                          | NR                                          | NR                                                    | NR                                                                                   | NR                                                          |
| Pantenburg, 2016 <sup>43</sup>      | Europe    | Germany                | 2012-2013    | Multiple Specialties  | 1784                                 | Mean: 32.8, SD: 4        | 698 (39.1)                | 22-item MBI-HSS                              | EE≥27                                          | DP≥10                                       | PA≤33                                                 | EE≥27 and DP≥10 and PA≤33                                                            | NR                                                          |

| Source                                        | Continent | Country                 | Survey Years | Specialty                 | Total Participants, No. <sup>b</sup> | Age, y <sup>c</sup>      | Men, No. (%) <sup>c</sup> | Burnout Assessment Instrument <sup>d,e</sup> | Emotional Exhaustion Definition <sup>f,g</sup> | Depersonalization Definition <sup>f,g</sup> | Low Personal Accomplishment Definition <sup>f,g</sup> | Overall Burnout Definition <sup>f,g</sup>                       | Depression Screening Instrument and Definition <sup>h</sup> |
|-----------------------------------------------|-----------|-------------------------|--------------|---------------------------|--------------------------------------|--------------------------|---------------------------|----------------------------------------------|------------------------------------------------|---------------------------------------------|-------------------------------------------------------|-----------------------------------------------------------------|-------------------------------------------------------------|
| Panagopoulou, 2006 <sup>44</sup>              | Europe    | Greece                  | 2004         | Internal Medicine         | 103                                  | Mean: 45, SD: 12         | 71 (68.9)                 | 14-item MBI-HSS for EE and DP Only           | EE>Top Quartile                                | DP>Top Quartile                             | NR                                                    | NR                                                              | NR                                                          |
| O'Kelly, 2016 <sup>45</sup>                   | Europe    | Ireland, United Kingdom | 2014         | Urology                   | 575                                  | NR                       | 503 (87.5)                | 22-item MBI-HSS                              | EE≥27                                          | DP≥13                                       | PA≤31                                                 | EE≥27 and (DP≥13 and/or PA≤31)                                  | NR                                                          |
| Bressi, 2009 <sup>46</sup>                    | Europe    | Italy                   | 2007         | Psychiatry                | 81                                   | Mean: 46.8, SD: 8.6      | 34 (42)                   | 22-item MBI-HSS                              | EE≥22                                          | DP≥6                                        | PA≤30                                                 | NR                                                              | GHQ-12≥4                                                    |
| Bressi, 2008 <sup>47</sup>                    | Europe    | Italy                   | 2005         | Hematology/Oncology       | 121                                  | Mean: 39.2, SD: 10.7     | 50 (41.3)                 | 22-item MBI-HSS                              | EE≥24                                          | DP≥9                                        | PA≤29                                                 | NR                                                              | GHQ-12≥4                                                    |
| Raggio, 2007 <sup>48</sup>                    | Europe    | Italy                   | NR           | Intensive Care            | 25                                   | Mean: 43.5, Range: 37-59 | 17 (68)                   | 22-item MBI-HSS                              | EE≥24                                          | DP≥9                                        | PA≤29                                                 | NR                                                              | NR                                                          |
| Grassi, 2000 <sup>49</sup>                    | Europe    | Italy                   | NR           | Internal Medicine         | 328                                  | Mean: 39.9               | 228 (69.5)                | 22-item MBI-HSS                              | EE>Top Tertile                                 | DP>Top Tertile                              | PA<Lowest Tertile                                     | NR                                                              | GHQ-12≥4                                                    |
| Mattei, 2017 <sup>50</sup>                    | Europe    | Italy                   | 2015         | Multiple Specialties      | 77                                   | NR                       | NR                        | 22-item MBI-HSS                              | NR                                             | NR                                          | NR                                                    | EE≥24 and/or DP≥9                                               | NR                                                          |
| Volpe, 2014 <sup>51</sup>                     | Europe    | Italy                   | NR           | Psychiatry                | 50                                   | Mean: 31.9, SD: 3.7      | 24 (48)                   | 22-item MBI-HSS                              | NR                                             | NR                                          | NR                                                    | EE≥27 and DP≥10 and PA≤33                                       | BDI-II≥14                                                   |
| Travado, 2005 <sup>52</sup>                   | Europe    | Italy, Portugal, Spain  | NR           | Oncology                  | 121                                  | Mean: 41.8, SD: 9.7      | 58 (46.4)                 | 22-item MBI-HSS                              | EE≥27                                          | DP≥10                                       | PA≤33                                                 | NR                                                              | NR                                                          |
| Pranckeviciene, 2016 <sup>53</sup>            | Europe    | Lithuania               | 2015         | Neurosurgery              | 31                                   | NR                       | 31 (100)                  | 16-item MBI-GS                               | EX>Top Tertile                                 | CY>Top Tertile                              | PE<Lowest Tertile                                     | NR                                                              | NR                                                          |
| Mikalauskas, 2018 <sup>54</sup>               | Europe    | Lithuania               | 2017         | Anesthesia                | 220                                  | NR                       | 84 (38.2)                 | 22-item MBI-HSS                              | EE≥27                                          | DP≥13                                       | PA≤31                                                 | EE≥27 and DP≥10 and PA≤31                                       | PRIME-MD≥3                                                  |
| Mikalauskas, 2012 <sup>55</sup>               | Europe    | Lithuania               | 2009         | Multiple Specialties      | 59                                   | Mean: 44.1, SD: 9.7      | 49 (83.1)                 | 22-item MBI-HSS                              | EE≥28                                          | DP≥11                                       | PA≤32                                                 | EE≥28 and/or DP≥11 and/or PA≤32                                 | PRIME-MD≥1                                                  |
| Ruitenburg, 2012 <sup>56</sup>                | Europe    | Netherlands             | 2009         | Multiple Specialties      | 216                                  | Mean: 47, SD: 8.9        | 119 (52)                  | 13-item MBI-UBOS for EE and DP Only          | NR                                             | NR                                          | NR                                                    | EE≥27 and DP≥10                                                 | BSI≥0.41                                                    |
| van der Ploeg, 2003 <sup>57</sup>             | Europe    | Netherlands             | NR           | Forensics                 | 84                                   | Mean: 42.2, SD: 7.1      | 57 (67.9)                 | 15-item MBI-UBOS                             | EE High                                        | DP High                                     | PA Low                                                | (EE High and DP High) and/or PA Low                             | NR                                                          |
| Meynaar, 2015 <sup>58</sup>                   | Europe    | Netherlands             | 2013         | Multiple Specialties      | 272                                  | Mean: 46, SD: 8          | 187 (68.8)                | 20-item MBI-UBOS                             | EE≥2.38                                        | DP≥1.6 (women)/DP≥1.8 (men)                 | PA≤3.7                                                | EE≥2.38 and (DP≥ 1.6 [women]/1.8 [men] and/or PA≤3.7)           | NR                                                          |
| van der Wal, 2016 <sup>59</sup>               | Europe    | Netherlands             | 2012         | Anesthesia                | 514                                  | Mean: 47.2, Range: 30-67 | 335 (62.5)                | 20-item MBI-UBOS                             | NR                                             | NR                                          | NR                                                    | EE>Top Quartile and (DP>Top Quartile and/or PA<Lowest Quartile) | GHQ-12≥2                                                    |
| Twellaar, 2008 <sup>60</sup>                  | Europe    | Netherlands             | 2002         | General Practice          | 349                                  | Mean: 45.9, SD: 7        | 180 (51.6)                | 20-item MBI-UBOS                             | NR                                             | NR                                          | NR                                                    | EE>Top Quartile and (DP>Top Quartile and/or PA<Lowest Quartile) | NR                                                          |
| Glebocka, 2017 <sup>61</sup>                  | Europe    | Poland                  | NR           | Multiple Specialties      | 48                                   | Mean: 43, SD: 11.1       | NR                        | MBI (Version Not Specified)                  | EE High                                        | DP High                                     | NR                                                    | NR                                                              | NR                                                          |
| Maroco, 2016 <sup>62</sup>                    | Europe    | Portugal                | 2011-2013    | Multiple Specialties      | 466                                  | Mean: 38.7, SD: 11       | 196 (42)                  | 15-item Modified MBI-HSS                     | NR                                             | NR                                          | NR                                                    | Average Subscale Score≥3                                        | NR                                                          |
| Marcelino, 2012 <sup>63</sup>                 | Europe    | Portugal                | 2010-2011    | Primary Care              | 150                                  | Mean: 54.5, SD: 9        | 67 (45.3)                 | 22-item MBI-HSS                              | EE≥27                                          | DP≥10                                       | PA≤33                                                 | EE≥27 and DP≥10 and PA≤33                                       | NR                                                          |
| Teixeira, 2013 <sup>64</sup>                  | Europe    | Portugal                | NR           | Intensive Care            | 73                                   | NR                       | NR                        | 22-item MBI-HSS                              | NR                                             | NR                                          | NR                                                    | EE≥25 and DP≥10 and PA≤32                                       | NR                                                          |
| Hagau, 2012 <sup>65</sup>                     | Europe    | Romania                 | 2011         | Anesthesia                | 68                                   | Mean: 41.7, SD: 6.3      | 20 (29.4)                 | 22-item MBI-HSS                              | EE≥28                                          | DP≥14                                       | PA≤30                                                 | NR                                                              | NR                                                          |
| Stojanovic-Tasic, 2018 <sup>66</sup>          | Europe    | Serbia                  | 2016         | Primary Care              | 210                                  | Mean: 48.3, SD: 9.6      | 36 (17.1)                 | 22-item MBI-HSS                              | EE High                                        | DP High                                     | PA Low                                                | NR                                                              | NR                                                          |
| Vicentic, 2013 <sup>67</sup>                  | Europe    | Serbia                  | NR           | Multiple Specialties      | 120                                  | Mean: 42, Range: 27-65   | 24 (20)                   | 22-item MBI-HSS                              | EE≥27                                          | DP≥10                                       | PA≤33                                                 | NR                                                              | NR                                                          |
| Milenovic, 2016 <sup>68</sup>                 | Europe    | Serbia                  | 2013         | Anesthesia                | 205                                  | Mean: 48.2, SD: 8.3      | 60 (29.3)                 | 22-item MBI-HSS                              | EE≥27                                          | DP≥13                                       | PA≤31                                                 | EE≥27 and DP≥13 and PA≤31                                       | NR                                                          |
| Putnik, 2011 <sup>69</sup>                    | Europe    | Serbia                  | 2008         | Primary Care              | 373                                  | Mean: 47                 | 60 (16)                   | MBI (Version Not Specified)                  | EX>2.5                                         | CY>1.6                                      | PE≤3.7                                                | NR                                                              | NR                                                          |
| Yuguero Torres, 2015 <sup>70</sup>            | Europe    | Spain                   | 2014         | General Practice          | 108                                  | Mean: 49.3               | 39 (36.1)                 | 22-item MBI-HSS                              | EE High                                        | DP High                                     | PA Low                                                | MBI (Specific Criteria Not Stated)                              | NR                                                          |
| Yuguero, 2017 <sup>71</sup>                   | Europe    | Spain                   | 2014         | General Practice          | 136                                  | NR                       | NR                        | 22-item MBI-HSS                              | EE High                                        | DP High                                     | PA Low                                                | MBI (Specific Criteria Not Stated)                              | NR                                                          |
| Chivato-Perez, 2011 <sup>72</sup>             | Europe    | Spain                   | 2008         | Allergy and Immunology    | 404                                  | Mean: 43.9, SD: 8.8      | 183 (45.2)                | 22-item MBI-HSS                              | EE≥25                                          | DP≥10                                       | PA≤32                                                 | NR                                                              | NR                                                          |
| Frutos-Llanes, 2014 <sup>73</sup>             | Europe    | Spain                   | 2011         | Primary Care              | 141                                  | Mean: 48.6, SD: 8.2      | 74 (52.5)                 | 22-item MBI-HSS                              | EE≥27                                          | DP≥10                                       | PA≤33                                                 | EE≥27 and DP≥10 and PA≤33                                       | NR                                                          |
| Martínez de la Casa Muñoz, 2003 <sup>74</sup> | Europe    | Spain                   | NR           | Multiple Specialties      | 144                                  | Mean: 45, SD: 7.7        | 104 (72.2)                | 22-item MBI-HSS                              | EE≥27                                          | DP≥10                                       | PA≤33                                                 | EE≥27 and/or DP≥10 and/or PA≤33                                 | NR                                                          |
| Vila Falgueras, 2014 <sup>75</sup>            | Europe    | Spain                   | 2010         | Primary Care              | 293                                  | NR                       | NR                        | 22-item MBI-HSS                              | EE≥27                                          | DP≥10                                       | PA≤33                                                 | EE≥27 and/or DP≥10 and/or PA≤33                                 | NR                                                          |
| Atalaya, 2008 <sup>76</sup>                   | Europe    | Spain                   | NR           | Obstetrics and Gynecology | 21                                   | Mean: 49.2, SD: 9        | 14 (66.7)                 | 22-item MBI-HSS                              | EE≥27                                          | DP≥10                                       | PA≤33                                                 | NR                                                              | NR                                                          |
| Riquelme, 2018 <sup>77</sup>                  | Europe    | Spain                   | 2015         | Multiple Specialties      | 301                                  | NR                       | 196 (65.1)                | 22-item MBI-HSS                              | EE>Top Quartile                                | DP>Top Quartile                             | PA<Lowest Quartile                                    | EE>Top Quartile and DP>Top Quartile and PA<Lowest Quartile      | NR                                                          |
| Yuguero, 2017 <sup>78</sup>                   | Europe    | Spain                   | 2016         | Emergency Medicine        | 43                                   | NR                       | NR                        | 22-item MBI-HSS                              | NR                                             | NR                                          | NR                                                    | (EE + DP + PA)≥47                                               | NR                                                          |
| Escriba-Aguir, 2007 <sup>79</sup>             | Europe    | Spain                   | 2000-2001    | Emergency Medicine        | 353                                  | NR                       | 233 (65.4)                | 9-item MBI-HSS for EE Only                   | EE≥27                                          | NR                                          | NR                                                    | NR                                                              | NR                                                          |

| Source                           | Continent     | Country               | Survey Years | Specialty                 | Total Participants, No. <sup>b</sup> | Age, y <sup>c</sup>      | Men, No. (%) <sup>c</sup> | Burnout Assessment Instrument <sup>d,e</sup> | Emotional Exhaustion Definition <sup>f,g</sup> | Depersonalization Definition <sup>f,g</sup> | Low Personal Accomplishment Definition <sup>f,g</sup> | Overall Burnout Definition <sup>f,g</sup> | Depression Screening Instrument and Definition <sup>e</sup> |
|----------------------------------|---------------|-----------------------|--------------|---------------------------|--------------------------------------|--------------------------|---------------------------|----------------------------------------------|------------------------------------------------|---------------------------------------------|-------------------------------------------------------|-------------------------------------------|-------------------------------------------------------------|
| Arigoni, 2009 <sup>80</sup>      | Europe        | Switzerland           | NR           | Multiple Specialties      | 371                                  | NR                       | 241 (65.5)                | 22-item MBI-HSS                              | EE≥27                                          | DP≥10                                       | PA≤33                                                 | EE≥27 and DP≥10 and PA≤33                 | GHQ-12≥4                                                    |
| Goehring, 2005 <sup>81</sup>     | Europe        | Switzerland           | 2002         | Primary Care              | 1755                                 | Mean: 50.8               | 1468 (83.6)               | 22-item MBI-HSS                              | EE≥27                                          | DP≥10                                       | PA≤33                                                 | EE≥27 and DP≥10 and PA≤33                 | NR                                                          |
| Merlani, 2011 <sup>82</sup>      | Europe        | Switzerland           | 2006-2007    | Intensive Care            | 459                                  | NR                       | 272 (58.5)                | 22-item MBI-HSS                              | NR                                             | NR                                          | NR                                                    | Score≥-8 to ≤34                           | NR                                                          |
| Hammig, 2012 <sup>83</sup>       | Europe        | Switzerland           | 2007         | Multiple Specialties      | 53                                   | NR                       | NR                        | 8-item Modified CBI                          | NR                                             | NR                                          | NR                                                    | Average CBI Subscale≥50                   | NR                                                          |
| Upton, 2012 <sup>84</sup>        | Europe        | United Kingdom        | NR           | Surgery                   | 313                                  | NR                       | 282 (92.2)                | 16-item MBI-GS                               | EX>Top Tertile                                 | CY>Top Tertile                              | NR                                                    | EX>Top Tertile and CY>Top Tertile         | NR                                                          |
| Orton, 2012 <sup>85</sup>        | Europe        | United Kingdom        | NR           | General Practice          | 564                                  | NR                       | 378 (68.5)                | 22-item MBI-HSS                              | EE High                                        | DP High                                     | PA Low                                                | NR                                        | NR                                                          |
| Taylor, 2005 <sup>86</sup>       | Europe        | United Kingdom        | 2002         | Multiple Specialties      | 1294                                 | NR                       | 1059 (81)                 | 22-item MBI-HSS                              | EE≥27                                          | NR                                          | NR                                                    | NR                                        | GHQ-12≥4                                                    |
| Colville, 2017 <sup>87</sup>     | Europe        | United Kingdom        | 2012-2014    | Intensive Care            | 74                                   | NR                       | NR                        | 9-item Abbreviated MBI-HSS                   | NR                                             | NR                                          | NR                                                    | EE≥27 and/or DP≥10                        | NR                                                          |
| Sharma, 2008 <sup>88</sup>       | Europe        | United Kingdom        | 2005         | Surgery                   | 496                                  | Mean: 47.4, SD: 7.4      | 460 (91.8)                | MBI (Version Not Specified)                  | EE High                                        | DP High                                     | PA Low                                                | NR                                        | GHQ-12≥4                                                    |
| Soltanifar, 2018 <sup>89</sup>   | Middle East   | Iran                  | 2016-2017    | Emergency Medicine        | 77                                   | Median: 36, Range: 30-48 | 0 (0)                     | 22-item MBI-HSS                              | EE≥27                                          | DP≥10                                       | PA≤33                                                 | NR                                        | NR                                                          |
| Ahmadpanah, 2015 <sup>90</sup>   | Middle East   | Iran                  | 2011         | General Practice          | 100                                  | Mean: 32.9, SD: 5.1      | 71 (71)                   | 22-item MBI-HSS                              | Mean EE≥4                                      | Mean DP≥4                                   | Mean PA≤4                                             | NR                                        | NR                                                          |
| Kushnir, 2014 <sup>91</sup>      | Middle East   | Israel                | 2007-2008    | Primary Care              | 136                                  | Mean: 52.2, SD: 7.0      | 43 (31.6)                 | 22-item MBI-HSS                              | EE≥27                                          | DP≥10                                       | PA≤33                                                 | EE≥27 and/or DP≥10                        | NR                                                          |
| Al-Shoraian, 2011 <sup>92</sup>  | Middle East   | Kuwait                | 2010-2011    | Family Medicine           | 200                                  | NR                       | 88 (44)                   | 22-item MBI-HSS                              | EE≥27                                          | DP≥10                                       | PA≤33                                                 | EE≥27 and DP≥10 and PA≤33                 | NR                                                          |
| Hamdan, 2017 <sup>93</sup>       | Middle East   | Palestine             | 2013         | Emergency Medicine        | 142                                  | NR                       | NR                        | 22-item MBI-HSS                              | EE High                                        | DP High                                     | PA Low                                                | EE High and DP High and PA Low            | NR                                                          |
| Abdulla, 2011 <sup>94</sup>      | Middle East   | Qatar                 | NR           | General Practice          | 183                                  | NR                       | 93 (50.8)                 | 16-item AMBQ                                 | NR                                             | NR                                          | NR                                                    | Score>19                                  | Positive Single-item Screen                                 |
| Al-Dubai, 2010 <sup>95</sup>     | Middle East   | Yemen                 | 2006-2007    | Multiple Specialties      | 563                                  | Mean: 33.3, SD: 5.7      | 335 (59.5)                | 22-item MBI-HSS                              | EE≥27                                          | DP≥13                                       | PA≤31                                                 | EE≥27 and DP≥13 and PA≤31                 | NR                                                          |
| Amanullah, 2017 <sup>96</sup>    | North America | Canada                | NR           | Multiple Specialties      | 55                                   | NR                       | NR                        | 16-item MBI-GS                               | EX High                                        | CY High                                     | PE Low                                                | NR                                        | NR                                                          |
| Wright, 2014 <sup>97</sup>       | North America | Canada                | NR           | Multiple Specialties      | 210                                  | Mean: 46.7, SD: 9.1      | 125 (59.4)                | 19-item CBI                                  | Personal Burnout (Cutoff Not Specified)        | Work-Related Burnout (Cutoff Not Specified) | Patient-Related Burnout (Cutoff Not Specified)        | NR                                        | NR                                                          |
| Helewa, 2013 <sup>98</sup>       | North America | Canada                | 2010         | Surgery                   | 18                                   | Median: 44, Range: 33-58 | 18 (94.7)                 | 22-item MBI-HSS                              | EE≥27                                          | DP≥10                                       | PA≤33                                                 | EE≥27 and/or DP≥10 and/or PA≤33           | NR                                                          |
| Lee, 2008 <sup>99</sup>          | North America | Canada                | NR           | Primary Care              | 123                                  | Median: 47               | 77 (62.6)                 | 22-item MBI-HSS                              | EE≥27                                          | DP≥10                                       | PA≤33                                                 | NR                                        | NR                                                          |
| Lloyd, 1994 <sup>100</sup>       | North America | Canada                | 1990         | Emergency Medicine        | 268                                  | Mean: 38                 | 233 (87)                  | 22-item MBI-HSS                              | EE≥40                                          | DP≥15                                       | PA≤36                                                 | NR                                        | NR                                                          |
| Elit, 2004 <sup>101</sup>        | North America | Canada                | 2002         | Gynecologic Oncology      | 35                                   | NR                       | 22 (64.7)                 | MBI (Version Not Specified)                  | EE High                                        | DP High                                     | PA Low                                                | NR                                        | GHQ-12≥4                                                    |
| Viviers, 2008 <sup>102</sup>     | North America | Canada                | NR           | Ophthalmology             | 124                                  | Mean: 50.3, SD: 10.5     | 86 (65.6)                 | MBI (Version Not Specified)                  | EE High                                        | DP High                                     | PA Low                                                | NR                                        | NR                                                          |
| Dyrbye, 2009 <sup>103</sup>      | North America | Canada, United States | 2007         | Internal Medicine         | 78                                   | Mean: 45.6, SD: 7.2      | 48 (62.3)                 | MBI (Version Not Specified)                  | EE High                                        | DP High                                     | PA Low                                                | EE High and/or DP High                    | NR                                                          |
| Puffer, 2017 <sup>104</sup>      | North America | United States         | NR           | Primary Care              | 2099                                 | NR                       | NR                        | 10-item Mini Z                               | NR                                             | NR                                          | NR                                                    | Score≥3                                   | NR                                                          |
| Johns, 2005 <sup>105</sup>       | North America | United States         | NR           | ENT                       | 107                                  | Mean: 56, Range: 34-75   | NR                        | 12-item Abbreviated MBI-HSS                  | EE≥27                                          | DP≥10                                       | PA≤33                                                 | EE≥27 and DP≥10 and PA≤33                 | NR                                                          |
| Gabbe, 2002 <sup>106</sup>       | North America | United States         | NR           | Obstetrics and Gynecology | 119                                  | Mean: 55, SD: 7.1        | 110 (92.4)                | 12-item Abbreviated MBI-HSS                  | EE≥27                                          | DP≥10                                       | PA≤33                                                 | EE≥27 and DP≥10 and PA≤33                 | NR                                                          |
| Cruz OA, 2007 <sup>107</sup>     | North America | United States         | NR           | Ophthalmology             | 101                                  | Mean: 56.9, SD: 7.9      | 98 (97)                   | 12-item Abbreviated MBI-HSS                  | EE≥27                                          | DP≥13                                       | PA≤31                                                 | EE≥27 and DP≥13 and PA≤31                 | NR                                                          |
| De Oliveira, 2011 <sup>108</sup> | North America | United States         | NR           | Anesthesia                | 96                                   | NR                       | 72 (72)                   | 12-item Abbreviated MBI-HSS                  | NR                                             | NR                                          | NR                                                    | EE≥27 and DP≥10 and PA≤31                 | NR                                                          |
| Garcia, 2015 <sup>109</sup>      | North America | United States         | NR           | Psychiatry                | 109                                  | Mean: 51.7, SD: 9.7      | 60 (49.6)                 | 16-item MBI-GS                               | EX≥17                                          | CY≥12                                       | PE≤9                                                  | NR                                        | NR                                                          |
| Rao, 2017 <sup>110</sup>         | North America | United States         | 2014         | Multiple Specialties      | 1774                                 | NR                       | 1027 (57.9)               | 16-item MBI-GS                               | NR                                             | NR                                          | NR                                                    | EX≥3.2 and CY≥2.6 and PE≤3.8              | NR                                                          |
| Shenoi, 2018 <sup>111</sup>      | North America | United States         | 2015         | Pediatric Critical Care   | 253                                  | NR                       | 153 (60.5)                | 22-item MBI-HSS                              | EE High                                        | DP High                                     | PA Low                                                | EE High and (DP High and/or PA Low)       | GHQ-12≥4                                                    |
| Aggarwal, 2015 <sup>112</sup>    | North America | United States         | 2014         | Radiation Oncology        | 47                                   | NR                       | NR                        | 22-item MBI-HSS                              | EE High                                        | DP High                                     | PA Low                                                | EE High and DP High and PA Low            | NR                                                          |
| Lu, 2015 <sup>113</sup>          | North America | United States         | 2013         | Emergency Medicine        | 54                                   | NR                       | NR                        | 22-item MBI-HSS                              | EE High                                        | DP High                                     | PA Low                                                | EE High and/or DP High                    | PRIME-MD≥1                                                  |
| Rath, 2015 <sup>114</sup>        | North America | United States         | 2013         | Obstetrics and Gynecology | 398                                  | Median: 48, IQR: 40-57   | 261 (62.4)                | 22-item MBI-HSS                              | EE High                                        | DP High                                     | PA Low                                                | EE High and/or DP High                    | PRIME-MD≥1                                                  |
| Kroll, 2016 <sup>115</sup>       | North America | United States         | 2013         | Pain Medicine             | 207                                  | Mean: 47.4, SD: 8.6      | 176 (85)                  | 22-item MBI-HSS                              | EE High                                        | DP High                                     | PA Low                                                | NR                                        | NR                                                          |

| Source                                   | Continent     | Country       | Survey Years | Specialty                 | Total Participants, No. <sup>b</sup> | Age, y <sup>c</sup>      | Men, No. (%) <sup>c</sup> | Burnout Assessment Instrument <sup>d,e</sup> | Emotional Exhaustion Definition <sup>f,g</sup> | Depersonalization Definition <sup>f,g</sup> | Low Personal Accomplishment Definition <sup>f,g</sup> | Overall Burnout Definition <sup>f,g</sup>                      | Depression Screening Instrument and Definition <sup>h</sup> |
|------------------------------------------|---------------|---------------|--------------|---------------------------|--------------------------------------|--------------------------|---------------------------|----------------------------------------------|------------------------------------------------|---------------------------------------------|-------------------------------------------------------|----------------------------------------------------------------|-------------------------------------------------------------|
| Streu, 2014 <sup>116</sup>               | North America | United States | NR           | Surgery                   | 506                                  | NR                       | 250 (49.5)                | 22-item MBI-HSS                              | EE High                                        | DP High                                     | PA Low                                                | NR                                                             | NR                                                          |
| Jesse, 2015 <sup>117</sup>               | North America | United States | 2013         | Surgery                   | 217                                  | Mean: 48.4, SD: 9.1      | 189 (86.7)                | 22-item MBI-HSS                              | EE High                                        | DP High                                     | PA Low                                                | NR                                                             | NR                                                          |
| Bertges Yost, 2005 <sup>118</sup>        | North America | United States | NR           | Surgery                   | 209                                  | Mean: 49, SD: 7.7        | 197 (94.3)                | 22-item MBI-HSS                              | EE High                                        | DP High                                     | PA Low                                                | NR                                                             | NR                                                          |
| Shanafelt, 2014 <sup>119</sup>           | North America | United States | 2012-2013    | Oncology                  | 1083                                 | Median: 52               | 554 (50.4)                | 22-item MBI-HSS                              | EE≥27                                          | DP≥10                                       | PA≤32                                                 | EE≥27 and/or DP≥10                                             | NR                                                          |
| Golub, 2008 <sup>120</sup>               | North America | United States | 2005         | ENT                       | 351                                  | Mean: 52, Range: 33-87   | 306 (87.2)                | 22-item MBI-HSS                              | EE≥27                                          | DP≥10                                       | PA≤33                                                 | EE≥27 and DP≥10 and PA≤33                                      | NR                                                          |
| Fletcher, 2012 <sup>121</sup>            | North America | United States | 2008         | ENT                       | 115                                  | NR                       | NR                        | 22-item MBI-HSS                              | EE≥27                                          | DP≥10                                       | PA≤33                                                 | EE≥27 and DP≥10 and PA≤33                                      | NR                                                          |
| Simons, 2016 <sup>122</sup>              | North America | United States | NR           | Orthopedic Surgery        | 12                                   | Mean: 39.1, SD: 4.5      | NR                        | 22-item MBI-HSS                              | EE≥27                                          | DP≥10                                       | PA≤33                                                 | EE≥27 and DP≥10 and PA≤33                                      | NR                                                          |
| Shanafelt, 2012 <sup>123</sup>           | North America | United States | 2011         | Multiple Specialties      | 7288                                 | Median: 55               | 5241 (71.9)               | 22-item MBI-HSS                              | EE≥27                                          | DP≥10                                       | PA≤33                                                 | EE≥27 and/or DP≥10                                             | PRIME-MD≥1                                                  |
| Shanafelt, 2015 <sup>124</sup>           | North America | United States | 2014         | Multiple Specialties      | 6822                                 | Median: 56               | 4497 (67.5)               | 22-item MBI-HSS                              | EE≥27                                          | DP≥10                                       | PA≤33                                                 | EE≥27 and/or DP≥10                                             | PRIME-MD≥1                                                  |
| Shanafelt, 2009 <sup>125</sup>           | North America | United States | 2007         | Internal Medicine         | 459                                  | NR                       | 345 (77.2)                | 22-item MBI-HSS                              | EE≥27                                          | DP≥10                                       | PA≤33                                                 | EE≥27 and/or DP≥10                                             | NR                                                          |
| Busis, 2017 <sup>126</sup>               | North America | United States | 2016         | Neurology                 | 1616                                 | Mean: 51, SD: 12         | 1091 (65.3)               | 22-item MBI-HSS                              | EE≥27                                          | DP≥10                                       | PA≤33                                                 | EE≥27 and/or DP≥10                                             | NR                                                          |
| Klimo, 2013 <sup>127</sup>               | North America | United States | NR           | Neurosurgery              | 81                                   | NR                       | 82 (96.5)                 | 22-item MBI-HSS                              | EE≥27                                          | DP≥10                                       | PA≤33                                                 | EE≥27 and/or DP≥10                                             | NR                                                          |
| McPhillips, 2007 <sup>128</sup>          | North America | United States | NR           | Pediatrics                | 137                                  | NR                       | 128 (88.9)                | 22-item MBI-HSS                              | EE≥27                                          | DP≥10                                       | PA≤33                                                 | EE≥27 and/or DP≥10                                             | NR                                                          |
| Contag, 2010 <sup>129</sup>              | North America | United States | NR           | ENT                       | 60                                   | Mean: 41, Range: 32-57   | 53 (88.3)                 | 22-item MBI-HSS                              | EE≥27                                          | DP≥13                                       | PA≤31                                                 | EE≥27 and DP≥10 and PA≤33                                      | NR                                                          |
| Guest, 2011 <sup>130</sup>               | North America | United States | 2009         | Surgery                   | 71                                   | NR                       | NR                        | 22-item MBI-HSS                              | EE≥27                                          | DP≥13                                       | PA≤31                                                 | EE≥27 and/or DP≥10                                             | GHQ-12≥4                                                    |
| Evans, 2015 <sup>131</sup>               | North America | United States | 2014         | Headache Medicine         | 127                                  | NR                       | 81 (63.8)                 | 22-item MBI-HSS                              | EE≥27                                          | DP≥13                                       | PA≤31                                                 | EE≥27 and/or PA≥13                                             | NR                                                          |
| Campbell, 2001 <sup>132</sup>            | North America | United States | NR           | Surgery                   | 577                                  | Mean: 50                 | 492 (94.4)                | 22-item MBI-HSS                              | EE≥27                                          | DP≥13                                       | PA≤31                                                 | NR                                                             | NR                                                          |
| Saleh, 2007 <sup>133</sup>               | North America | United States | NR           | Orthopedic Surgery        | 193                                  | Mean: 53.7, Range: 32-83 | NR                        | 22-item MBI-HSS                              | EE≥27                                          | DP≥13                                       | PA≤31                                                 | NR                                                             | NR                                                          |
| Kamal, 2016 <sup>134</sup>               | North America | United States | 2013         | Palliative Care           | 691                                  | NR                       | NR                        | 22-item MBI-HSS                              | EE≥27                                          | DP≥13                                       | NR                                                    | EE≥27 and/or DP≥13                                             | NR                                                          |
| Shanafelt, 2009 <sup>135</sup>           | North America | United States | 2008         | Surgery                   | 7830                                 | Median: 51, IQR: 43-59   | 6815 (86.7)               | 22-item MBI-HSS                              | EE≥28                                          | DP≥11                                       | PA≤32                                                 | EE≥28 and/or DP≥11                                             | PRIME-MD≥1                                                  |
| Qureshi, 2014 <sup>136</sup>             | North America | United States | 2010         | Surgery                   | 1605                                 | Mean: 50.8, Range: 33-74 | 1243 (73.5)               | 22-item MBI-HSS                              | EE≥28                                          | DP≥11                                       | PA≤32                                                 | EE≥28 and/or DP≥11                                             | NR                                                          |
| De Stefano, 2018 <sup>137</sup>          | North America | United States | 2016         | Emergency Medicine        | 23                                   | Median: 34               | 14 (60.9)                 | 22-item MBI-HSS                              | EE≥28                                          | DP≥14                                       | PA≤29                                                 | EE≥28 and DP≥14 and PA≤29                                      | BDI≥19                                                      |
| Saleh, 2009 <sup>138</sup>               | North America | United States | NR           | Orthopedic Surgery        | 104                                  | NR                       | NR                        | 22-item MBI-HSS                              | EE≥28                                          | NR                                          | NR                                                    | NR                                                             | NR                                                          |
| Guntupalli, 1996 <sup>139</sup>          | North America | United States | NR           | Intensive Care            | 253                                  | Mean: 41.6, SD: 6.7      | 220 (88.7)                | 22-item MBI-HSS                              | EE≥30                                          | DP≥12                                       | PA≤33                                                 | NR                                                             | NR                                                          |
| West, 2013 <sup>140</sup>                | North America | United States | 2010         | Internal Medicine         | 282                                  | Mean: 51.4, SD: 8.2      | 195 (69.9)                | 2-item Modified MBI-HSS for EE and DP Only   | Single-item Measure of EE≥4                    | Single-item Measure of DP≥4                 | NR                                                    | Single-item EE≥4 and/or Single-item DP≥4                       | PRIME-MD≥1                                                  |
| West, 2014 <sup>141</sup>                | North America | United States | 2010-2012    | Internal Medicine         | 424                                  | NR                       | 324 (76.4)                | 2-item Modified MBI-HSS for EE and DP Only   | Single-item Measure of EE≥4                    | Single-item Measure of DP≥4                 | NR                                                    | Single-item EE≥4 and/or Single-item DP≥4                       | PRIME-MD≥1                                                  |
| Balch, 2011 <sup>142</sup>               | North America | United States | 2010         | Surgery                   | 7164                                 | Median: 53, IQR: 45-61   | 6116 (85.4)               | 2-item Modified MBI-HSS for EE and DP Only   | Single-item Measure of EE≥4                    | Single-item Measure of DP≥4                 | NR                                                    | Single-item EE≥4 and/or Single-item DP≥4                       | PRIME-MD≥1                                                  |
| Gorelick, 2016 <sup>143</sup>            | North America | United States | 2013         | Emergency Medicine        | 895                                  | NR                       | 414 (46.3)                | 2-item Modified MBI-HSS for EE and DP Only   | Single-item Measure of EE≥4                    | Single-item Measure of DP≥4                 | NR                                                    | NR                                                             | NR                                                          |
| Salmoirago-Blotcher, 2016 <sup>144</sup> | North America | United States | 2014         | Emergency Medicine        | 138                                  | Mean: 47.8, SD: 10.5     | 95 (71.4)                 | 2-item Modified MBI-HSS for EE and DP Only   | NR                                             | NR                                          | NR                                                    | Single-item EE≥4 and/or Single-item DP≥4                       | NR                                                          |
| Tak, 2017 <sup>145</sup>                 | North America | United States | 2011         | Multiple Specialties      | 1289                                 | NR                       | 815 (63.2)                | 2-item Modified MBI-HSS for EE and DP Only   | NR                                             | NR                                          | NR                                                    | Single-item EE≥4 and/or Single-item DP≥4                       | NR                                                          |
| Weintraub, 2016 <sup>146</sup>           | North America | United States | 2011         | Neonatology               | 433                                  | NR                       | 198 (47.3)                | 54-item Modified CFST                        | NR                                             | NR                                          | NR                                                    | CFST>"High-End" Cutoff                                         | NR                                                          |
| Kase, 2017 <sup>147</sup>                | North America | United States | NR           | Palliative Care           | 102                                  | NR                       | NR                        | 54-item Modified CFST                        | NR                                             | NR                                          | NR                                                    | CFST>"Natural High-End Cut Point"                              | NR                                                          |
| Yoon, 2010 <sup>148</sup>                | North America | United States | 2008-2009    | Obstetrics and Gynecology | 1128                                 | Mean: 47.8, SD: 9.2      | 617 (53.5)                | 5-item MBI-GS for EX Only                    | EX≥3.2                                         | NR                                          | NR                                                    | NR                                                             | NR                                                          |
| Chew, 2017 <sup>149</sup>                | North America | United States | 2016         | Radiology                 | 413                                  | NR                       | 339 (79.2)                | 7-item Modified MBI-HSS                      | Single-item Measure of EE≥27                   | Single-item Measure of DP≥10                | 5-item Measure of PA≤33                               | Single-item EE≥27 and/or Single-item DP≥10 and/or 5-item PA≤33 | NR                                                          |
| Deckard, 1992 <sup>150</sup>             | North America | United States | 1987         | Infectious Disease        | 1484                                 | Mean: 44.8, Range: 29-84 | 1601 (87)                 | Golembiewski et al. Modified MBI             | EE≥18                                          | DP≥26                                       | PA≤22                                                 | NR                                                             | NR                                                          |
| Deckard, 1994 <sup>151</sup>             | North America | United States | NR           | Multiple Specialties      | 235                                  | NR                       | 143 (60.9)                | Golembiewski et al. Modified MBI             | EE≥18                                          | DP≥26                                       | PA≤22                                                 | NR                                                             | NR                                                          |



| Source                              | Continent     | Country                | Survey Years | Specialty               | Total Participants, No. <sup>b</sup> | Age, y <sup>c</sup>      | Men, No. (%) <sup>c</sup> | Burnout Assessment Instrument <sup>d,e</sup>                 | Emotional Exhaustion Definition <sup>f,g</sup> | Depersonalization Definition <sup>f,g</sup> | Low Personal Accomplishment Definition <sup>f,g</sup> | Overall Burnout Definition <sup>f,g</sup>                              | Depression Screening Instrument and Definition <sup>h</sup> |
|-------------------------------------|---------------|------------------------|--------------|-------------------------|--------------------------------------|--------------------------|---------------------------|--------------------------------------------------------------|------------------------------------------------|---------------------------------------------|-------------------------------------------------------|------------------------------------------------------------------------|-------------------------------------------------------------|
| Fields, 1995 <sup>152</sup>         | North America | United States          | 1991         | Pediatric Critical Care | 389                                  | Mean: 39.6, SD: NR       | 312 (80.6)                | Pines and Aronson Burnout Measure                            | NR                                             | NR                                          | NR                                                    | Pines and Aronson Burnout Measure Score>4                              | NR                                                          |
| Hinami, 2012 <sup>153</sup>         | North America | United States          | 2009-2010    | Hospitalist Medicine    | 776                                  | Median: 42               | 516 (66.5)                | Rohland et al. Single-item Measure of Self-Perceived Burnout | NR                                             | NR                                          | NR                                                    | Rohland et al. Score≥3                                                 | NR                                                          |
| Jager, 2017 <sup>154</sup>          | North America | United States          | 2014-2015    | Multiple Specialties    | 2239                                 | Mean: 52.6, SD: 11.2     | 1528 (67.5)               | Rohland et al. Single-item Measure of Self-Perceived Burnout | NR                                             | NR                                          | NR                                                    | Rohland et al. Score≥3                                                 | NR                                                          |
| Rohland, 2004 <sup>155</sup>        | North America | United States          | 2000         | Multiple Specialties    | 299                                  | Mean: 44, SD: 4          | 221 (74)                  | Rohland et al. Single-item Measure of Self-Perceived Burnout | NR                                             | NR                                          | NR                                                    | Rohland et al. Score≥3                                                 | NR                                                          |
| Yoon, 2016 <sup>156</sup>           | North America | United States          | 2010-2011    | Multiple Specialties    | 1119                                 | NR                       | 756 (65.4)                | Rohland et al. Single-item Measure of Self-Perceived Burnout | NR                                             | NR                                          | NR                                                    | Rohland et al. Score≥3                                                 | NR                                                          |
| Yoon, 2017 <sup>157</sup>           | North America | United States          | 2009-2010    | Multiple Specialties    | 1208                                 | NR                       | 749 (62.0)                | Rohland et al. Single-item Measure of Self-Perceived Burnout | NR                                             | NR                                          | NR                                                    | Rohland et al. Score≥3                                                 | NR                                                          |
| Helfrich, 2013 <sup>158</sup>       | North America | United States          | 2012         | Primary Care            | 1769                                 | NR                       | NR                        | Rohland et al. Single-item Measure of Self-Perceived Burnout | NR                                             | NR                                          | NR                                                    | Rohland et al. Score≥3                                                 | NR                                                          |
| Starmer, 2016 <sup>159</sup>        | North America | United States          | 2013         | Pediatrics              | 836                                  | NR                       | 332 (39.7)                | Single-item Measure of Self-Perceived Burnout                | NR                                             | NR                                          | NR                                                    | Positive Single-item Screen                                            | Positive Single-item Screen                                 |
| Doan-Wiggins, 1995 <sup>160</sup>   | North America | United States          | 1989         | Emergency Medicine      | 737                                  | Mean: 40.5               | 687 (89.5)                | Single-item Measure of Self-Perceived Burnout                | NR                                             | NR                                          | NR                                                    | Positive Single-item Screen                                            | NR                                                          |
| Johnson, 1993 <sup>161</sup>        | North America | United States          | NR           | ENT                     | 380                                  | Mean: 48                 | NR                        | Single-item Measure of Self-Perceived Burnout                | NR                                             | NR                                          | NR                                                    | Positive Single-item Screen                                            | NR                                                          |
| Glasheen, 2011 <sup>162</sup>       | North America | United States          | NR           | Hospitalist Medicine    | 265                                  | NR                       | 140 (54.0)                | Single-item Measure of Self-Perceived Burnout                | NR                                             | NR                                          | NR                                                    | Positive Single-item Screen                                            | NR                                                          |
| Whippen, 1991 <sup>163</sup>        | North America | United States          | 1990         | Oncology                | 594                                  | NR                       | NR                        | Single-item Measure of Self-Perceived Burnout                | NR                                             | NR                                          | NR                                                    | Positive Single-item Screen                                            | NR                                                          |
| Coleman, 2015 <sup>164</sup>        | North America | United States          | 2014         | Multiple Specialties    | 1016                                 | Mean: 52, SD: 10.1       | 683 (67.2)                | Single-item Measure of Self-Perceived Burnout                | NR                                             | NR                                          | NR                                                    | Positive Single-item Screen                                            | NR                                                          |
| Silver, 2017 <sup>165</sup>         | North America | United States          | 2016         | Multiple Specialties    | 88                                   | NR                       | 40 (45)                   | Single-item Measure of Self-Perceived Burnout                | NR                                             | NR                                          | NR                                                    | Positive Single-item Screen                                            | NR                                                          |
| Allegra, 2005 <sup>166</sup>        | North America | United States          | 2003         | Oncology                | 1740                                 | NR                       | NR                        | Single-item Measure of Self-Perceived Burnout                | NR                                             | NR                                          | NR                                                    | Positive Single-item Screen                                            | NR                                                          |
| Pozdnyakova, 2018 <sup>167</sup>    | North America | United States          | 2017         | Primary Care            | 6                                    | NR                       | NR                        | Single-item Measure of Self-Perceived Burnout                | NR                                             | NR                                          | NR                                                    | Positive Single-item Screen                                            | NR                                                          |
| Dolan, 2014 <sup>168</sup>          | North America | United States          | 2012         | Primary Care            | 1769                                 | NR                       | NR                        | Single-item Modified MBI-HSS                                 | Single-item Measure of EE≥4                    | NR                                          | NR                                                    | NR                                                                     | NR                                                          |
| Stafford, 2010 <sup>169</sup>       | Oceania       | Australia              | 2008         | Gynecologic Oncology    | 29                                   | NR                       | 24 (82.8)                 | 22-item MBI-HSS                                              | EE High                                        | DP High                                     | PA Low                                                | NR                                                                     | GHQ-12≥4                                                    |
| Ifediora, 2016 <sup>170</sup>       | Oceania       | Australia              | 2013-2014    | Concierge Medicine      | 168                                  | NR                       | 135 (80.4)                | 22-item MBI-HSS                                              | EE High Frequency Percentage                   | DP High Frequency Percentage                | PA High Frequency Percentage                          | NR                                                                     | NR                                                          |
| Dunwoodie, 2007 <sup>171</sup>      | Oceania       | Australia              | 2005-2006    | Palliative Care         | 40                                   | Mean: 50, Range: 35-66   | 29 (70.7)                 | 22-item MBI-HSS                                              | EE≥27                                          | DP≥10                                       | PA≤33                                                 | EE≥27 and/or DP≥10                                                     | GHQ-12≥4                                                    |
| Kluger, 2003 <sup>172</sup>         | Oceania       | Australia              | NR           | Anesthesia              | 422                                  | NR                       | 350 (83)                  | 22-item MBI-HSS                                              | EE≥28                                          | DP≥11                                       | PA≤39                                                 | NR                                                                     | NR                                                          |
| Winefield, 1991 <sup>173</sup>      | Oceania       | Australia              | 1987         | General Practice        | 929                                  | Mean: 42.8               | 748 (79.7)                | 22-item MBI-HSS                                              | Mean EE>3                                      | Mean DP>3                                   | Mean PA<3                                             | NR                                                                     | NR                                                          |
| Pit, 2014 <sup>174</sup>            | Oceania       | Australia              | 2011         | General Practice        | 92                                   | NR                       | 55 (59.8)                 | 9-item MBI-HSS for EE Only                                   | EE High                                        | NR                                          | NR                                                    | NR                                                                     | NR                                                          |
| Leung, 2015 <sup>175</sup>          | Oceania       | Australia, New Zealand | 2013         | Radiation Oncology      | 220                                  | Median: 45.4             | 132 (60)                  | 22-item MBI-HSS                                              | EE≥27                                          | DP≥10                                       | PA≤32                                                 | EE≥27 and DP≥10 and PA≤32                                              | NR                                                          |
| Surgenor, 2009 <sup>176</sup>       | Oceania       | New Zealand            | 2006-2007    | Multiple Specialties    | 267                                  | Mean: 48, SD: 7.7        | 195 (73)                  | 22-item MBI-HSS                                              | EE≥27                                          | DP≥10                                       | PA≤33                                                 | EE≥27 and (DP≥10 and/or PA≤33)                                         | NR                                                          |
| Bruce, 2005 <sup>177</sup>          | Oceania       | New Zealand            | 2002         | General Practice        | 50                                   | NR                       | 42 (85.7)                 | 22-item MBI-HSS                                              | EE≥27                                          | DP≥10                                       | PA≤33                                                 | EE≥27 and DP≥10 and PA≤33                                              | GHQ-12≥4                                                    |
| Kumar, 2007 <sup>178</sup>          | Oceania       | New Zealand            | NR           | Psychiatry              | 239                                  | NR                       | 149 (62.6)                | 22-item MBI-HSS                                              | EE≥27                                          | DP≥13                                       | PA≤31                                                 | NR                                                                     | NR                                                          |
| Gil-Monte, 2008 <sup>179</sup>      | South America | Argentina              | 2006         | Pediatrics              | 123                                  | Mean: 42.4, Range: 24-70 | 34 (27.6)                 | 22-item MBI-HSS                                              | EE≥27                                          | DP≥13                                       | PA≤31                                                 | EE≥27 and DP≥13 and PA≤31                                              | NR                                                          |
| Barbosa, 2017 <sup>180</sup>        | South America | Brazil                 | 2014         | Anesthesia              | 43                                   | Mean: 49.8, SD: 12.1     | 22 (51.2)                 | 22-item MBI-HSS                                              | EE≥27                                          | DP≥10                                       | PA≤33                                                 | EE≥27 and DP≥10 and PA≤33                                              | NR                                                          |
| Barbosa, 2012 <sup>181</sup>        | South America | Brazil                 | 2011         | Intensive Care          | 67                                   | Mean: 43.9, SD: 9.0      | 30 (44.8)                 | 22-item MBI-HSS                                              | EE≥27                                          | DP≥10                                       | PA≤33                                                 | EE≥27 and DP≥10 and PA≤33                                              | NR                                                          |
| Garcia, 2014 <sup>182</sup>         | South America | Brazil                 | NR           | Pediatrics              | 70                                   | Mean: 36.2, SD: 8.4      | 15 (21.4)                 | 22-item MBI-HSS                                              | EE≥27                                          | DP≥13                                       | PA≤30                                                 | EE≥27 and/or DP≥13 and/or PA≤30                                        | NR                                                          |
| Barros, 2008 <sup>183</sup>         | South America | Brazil                 | 2006         | Intensive Care          | 297                                  | Mean: 34.2, SD: 6.9      | 208 (71.7)                | 22-item MBI-HSS                                              | EE≥27                                          | DP≥13                                       | PA≤31                                                 | EE≥27 and DP≥13 and PA≤31                                              | NR                                                          |
| Tironi, 2010 <sup>184</sup>         | South America | Brazil                 | 2007         | Multiple Specialties    | 296                                  | Mean: 34.2, SD: 6.9      | 208 (71.7)                | 22-item MBI-HSS                                              | EE≥27                                          | DP≥13                                       | PA≤31                                                 | EE≥27 and DP≥13 and PA≤31                                              | NR                                                          |
| Zanatta, 2015 <sup>185</sup>        | South America | Brazil                 | 2012         | Pediatrics              | 36                                   | Mean: 39.5               | NR                        | 22-item MBI-HSS                                              | EE>Top Quartile                                | DP>Top Quartile                             | PA<Lowest Quartile                                    | EE>Top Quartile and DP>Top Quartile and PA<Lowest Quartile             | NR                                                          |
| Govêia, 2018 <sup>186</sup>         | South America | Brazil                 | 2014-2015    | Anesthesia              | 41                                   | Mean: 42, SD 9.7         | 21 (51.2)                 | MBI (Version Not Specified)                                  | EE≥26                                          | DP≥9                                        | PA≤33                                                 | EE≥26 and DP≥9 and PA≤33                                               | NR                                                          |
| Aguirre Roldan, 2015 <sup>187</sup> | South America | Colombia               | NR           | Multiple Specialties    | 106                                  | Mean: 29.8, SD: 5        | 44 (41.5)                 | 20-item CESQT                                                | CESQT-EE>Top Tertile                           | CESQT-DP>Top Tertile                        | CESQT-PA<Lowest Tertile                               | CESQT-EE>Top Tertile and CESQT-DP>Top Tertile and CESQT-PA>Top Tertile | NR                                                          |

| Source                                    | Continent     | Country   | Survey Years | Specialty            | Total Participants, No. <sup>b</sup> | Age, y <sup>c</sup> | Men, No. (%) <sup>c</sup> | Burnout Assessment Instrument <sup>d,e</sup> | Emotional Exhaustion Definition <sup>f,g</sup> | Depersonalization Definition <sup>f,g</sup> | Low Personal Accomplishment Definition <sup>f,g</sup> | Overall Burnout Definition <sup>f,g</sup> | Depression Screening Instrument and Definition <sup>g</sup> |
|-------------------------------------------|---------------|-----------|--------------|----------------------|--------------------------------------|---------------------|---------------------------|----------------------------------------------|------------------------------------------------|---------------------------------------------|-------------------------------------------------------|-------------------------------------------|-------------------------------------------------------------|
| Maticorena-Quevedo J, 2014 <sup>188</sup> | South America | Peru      | 2014         | Multiple Specialties | 2228                                 | NR                  | 1697 (76.2)               | 22-item MBI-HSS                              | EE≥27                                          | DP≥10                                       | PA≤33                                                 | EE≥27 and DP≥10 and PA≤33                 | NR                                                          |
| Burghi, 2016 <sup>189</sup>               | South America | Uruguay   | NR           | Intensive Care       | 82                                   | NR                  | NR                        | MBI (Version Not Specified)                  | NR                                             | NR                                          | NR                                                    | Score≥-8 to ≤34                           | NR                                                          |
| Arayago, 2016 <sup>190</sup>              | South America | Venezuela | 2015         | Anesthesia           | 34                                   | NR                  | NR                        | 22-item MBI-HSS                              | NR                                             | NR                                          | NR                                                    | EE≥19 and/or DP≥6 and/or PA≤39            | NR                                                          |

**Abbreviations:** aMBI, abbreviated MBI; BDI, Beck Depression Inventory; BSI, Brief Symptom Inventory; CY, cynicism; DP, depersonalization; EE, emotional exhaustion; ENT, otorhinolaryngology; EX, exhaustion; GHQ-12, 12-item General Health Questionnaire; HBI, Hamburg Burnout Inventory; IQR, interquartile range; MBI, Maslach Burnout Inventory; MBI-GS, MBI-General Survey; MBI-HSS, MBI-Human Services Survey; MBI-UBOS, MBI-Utrechtse Burnout Schaal (Dutch adaptation of the MBI); MDI, Major Depression Inventory; NR, not reported; PA, personal accomplishment; PE, professional efficacy; PHQ-9, 9-item Patient Health Questionnaire; PRIME-MD, Primary Care Evaluation of Mental Disorders; SD, standard deviation. Note that these abbreviations are also used in subsequent tables.

<sup>a</sup>Studies are ordered alphabetically by continent and then by country and medical specialty.

<sup>b</sup>Number of participants who were practicing physicians (*i.e.*, not medical students or resident physicians) for whom burnout data were available.

<sup>c</sup>If age and sex data for the entire population of included practicing physicians were not explicitly reported by the study, they were back calculated or inferred when possible.

<sup>d</sup>If the burnout assessment method was not explicitly reported by the study, it was inferred when possible based on the manuscripts or manuals the study cited.

<sup>e</sup>Studies for which a specific instrument is not specified (*e.g.*, "Single-item Measure of Self-Perceived Burnout") used variably worded short-form screening instruments.

<sup>f</sup>If the cutoff was not explicitly reported by the study, it was inferred when possible based on the manuscripts or manuals the study cited. If it was not possible to infer the cutoff, then the cutoff was listed simply as "high" or "low."

<sup>g</sup>Note that the MBI-GS uses the terms "exhaustion," "cynicism," and "professional efficiency" rather than "emotional exhaustion," "depersonalization," and "personal accomplishment."

**eTable 2.** Summary of the Countries and Continents or Regions in Which Studies Were Conducted

| <b>Country</b>         | <b>No. of Studies</b> | <b>%</b> |
|------------------------|-----------------------|----------|
| Argentina              | 1                     | 0.5%     |
| Armenia                | 1                     | 0.5%     |
| Australia              | 6                     | 3.3%     |
| Austria                | 1                     | 0.5%     |
| Belgium                | 2                     | 1.1%     |
| Bosnia and Herzegovina | 2                     | 1.1%     |
| Brazil                 | 7                     | 3.8%     |
| Canada                 | 7                     | 3.8%     |
| China                  | 5                     | 2.7%     |
| Colombia               | 1                     | 0.5%     |
| Croatia                | 1                     | 0.5%     |
| Denmark                | 4                     | 2.2%     |
| France                 | 4                     | 2.2%     |
| Germany                | 3                     | 1.6%     |
| Greece                 | 1                     | 0.5%     |
| India                  | 2                     | 1.1%     |
| Iran                   | 2                     | 1.1%     |
| Israel                 | 1                     | 0.5%     |
| Italy                  | 6                     | 3.3%     |
| Japan                  | 3                     | 1.6%     |
| Kuwait                 | 1                     | 0.5%     |
| Lithuania              | 3                     | 1.6%     |
| Morocco                | 1                     | 0.5%     |
| Multiple Countries     | 4                     | 2.2%     |
| Netherlands            | 5                     | 2.7%     |
| New Zealand            | 3                     | 1.6%     |
| Pakistan               | 1                     | 0.5%     |
| Palestine              | 1                     | 0.5%     |
| Peru                   | 1                     | 0.5%     |
| Poland                 | 1                     | 0.5%     |
| Portugal               | 3                     | 1.6%     |
| Qatar                  | 1                     | 0.5%     |
| Romania                | 1                     | 0.5%     |
| Saudi Arabia           | 1                     | 0.5%     |
| Serbia                 | 4                     | 2.2%     |
| Singapore              | 1                     | 0.5%     |
| Spain                  | 10                    | 5.5%     |
| Switzerland            | 4                     | 2.2%     |
| Taiwan                 | 2                     | 1.1%     |

| <b>Country</b>             | <b>No. of Studies</b> | <b>%</b> |
|----------------------------|-----------------------|----------|
| Turkey                     | 1                     | 0.5%     |
| United Kingdom             | 5                     | 2.7%     |
| United States              | 65                    | 35.7%    |
| Uruguay                    | 1                     | 0.5%     |
| Venezuela                  | 1                     | 0.5%     |
| Yemen                      | 1                     | 0.5%     |
| <b>Continent or Region</b> | <b>No. of Studies</b> | <b>%</b> |
| Africa                     | 1                     | 0.5%     |
| Asia                       | 17                    | 9.1%     |
| Europe                     | 62                    | 33.2%    |
| Middle East                | 7                     | 3.7%     |
| North America              | 73                    | 39.0%    |
| Oceania                    | 10                    | 5.3%     |
| South America              | 12                    | 6.4%     |

**eTable 3.** Newcastle-Ottawa Risk-of-Bias Scores of the 182 Studies Included in this Systematic Review

| Source                              | Representativeness | Sample Size | Non-respondents | Ascertainment | Descriptive Statistics |
|-------------------------------------|--------------------|-------------|-----------------|---------------|------------------------|
| Massou, 2013 <sup>9</sup>           | 0                  | 0           | 0               | 0             | 0                      |
| Margaryan, 2010 <sup>10</sup>       | 1                  | 0           | 0               | 1             | 1                      |
| Xiao, 2014 <sup>11</sup>            | 0                  | 0           | 0               | 1             | 0                      |
| Wu, 2013 <sup>12</sup>              | 1                  | 1           | 0               | 1             | 1                      |
| Wang, 2014 <sup>13</sup>            | 1                  | 1           | 0               | 1             | 1                      |
| Siu, 2012 <sup>14</sup>             | 1                  | 0           | 0               | 1             | 0                      |
| Li, 2018 <sup>15</sup>              | 0                  | 1           | 0               | 1             | 0                      |
| Das, 2016 <sup>16</sup>             | 0                  | 0           | 0               | 1             | 0                      |
| Langade, 2016 <sup>17</sup>         | 1                  | 1           | 0               | 1             | 0                      |
| Nishimura, 2014 <sup>18</sup>       | 1                  | 1           | 0               | 1             | 0                      |
| Saijo, 2014 <sup>19</sup>           | 0                  | 1           | 0               | 1             | 0                      |
| Asai, 2007 <sup>20</sup>            | 1                  | 1           | 0               | 1             | 1                      |
| Zafar, 2016 <sup>21</sup>           | 1                  | 0           | 0               | 1             | 0                      |
| Sadat-Ali, 2005 <sup>22</sup>       | 0                  | 0           | 0               | 0             | 0                      |
| See, 2016 <sup>23</sup>             | 0                  | 0           | 0               | 1             | 0                      |
| Chou, 2014 <sup>24</sup>            | 0                  | 0           | 0               | 1             | 1                      |
| Chen, 2013 <sup>25</sup>            | 1                  | 1           | 0               | 1             | 0                      |
| Schooley, 2016 <sup>26</sup>        | 0                  | 0           | 1               | 1             | 0                      |
| Wurm, 2016 <sup>27</sup>            | 1                  | 1           | 1               | 1             | 1                      |
| Eelen, 2014 <sup>28</sup>           | 1                  | 0           | 0               | 1             | 0                      |
| Vandenbroeck, 2017 <sup>29</sup>    | 1                  | 1           | 0               | 1             | 1                      |
| Selmanovic, 2011 <sup>30</sup>      | 0                  | 0           | 0               | 0             | 0                      |
| Stanetic, 2013 <sup>31</sup>        | 0                  | 0           | 0               | 1             | 0                      |
| Ozvacic Adzic Z, 2013 <sup>32</sup> | 0                  | 0           | 0               | 1             | 1                      |
| Pedersen, 2013 <sup>33</sup>        | 0                  | 1           | 0               | 1             | 0                      |
| Pedersen, 2016 <sup>34</sup>        | 1                  | 1           | 0               | 1             | 0                      |
| Pedersen, 2018 <sup>35</sup>        | 0                  | 1           | 0               | 1             | 0                      |
| Brondt, 2008 <sup>36</sup>          | 0                  | 1           | 0               | 1             | 1                      |

| Source                               | Representativeness | Sample Size | Non-respondents | Ascertainment | Descriptive Statistics |
|--------------------------------------|--------------------|-------------|-----------------|---------------|------------------------|
| Lesage, 2013 <sup>37</sup>           | 0                  | 1           | 0               | 1             | 0                      |
| Dreano-Hartz, 2015 <sup>38</sup>     | 0                  | 1           | 0               | 1             | 1                      |
| Lamothe, 2014 <sup>39</sup>          | 0                  | 0           | 0               | 1             | 1                      |
| Embriaco, 2007 <sup>40</sup>         | 1                  | 1           | 0               | 1             | 0                      |
| Bohle, 2001 <sup>41</sup>            | 0                  | 0           | 0               | 1             | 0                      |
| Richter, 2014 <sup>42</sup>          | 1                  | 0           | 0               | 1             | 0                      |
| Pantenburg, 2016 <sup>43</sup>       | 1                  | 1           | 0               | 1             | 1                      |
| Panagopoulou, 2006 <sup>44</sup>     | 0                  | 0           | 0               | 1             | 1                      |
| O'Kelly, 2016 <sup>45</sup>          | 0                  | 1           | 0               | 1             | 0                      |
| Bressi, 2009 <sup>46</sup>           | 0                  | 0           | 0               | 1             | 1                      |
| Bressi, 2008 <sup>47</sup>           | 0                  | 0           | 0               | 1             | 1                      |
| Raggio, 2007 <sup>48</sup>           | 0                  | 0           | 0               | 1             | 0                      |
| Grassi, 2000 <sup>49</sup>           | 1                  | 1           | 0               | 1             | 0                      |
| Mattei, 2017 <sup>50</sup>           | 0                  | 0           | 0               | 1             | 0                      |
| Volpe, 2014 <sup>51</sup>            | 0                  | 0           | 1               | 0             | 1                      |
| Travado, 2005 <sup>52</sup>          | 1                  | 0           | 0               | 1             | 1                      |
| Pranckeviciene, 2016 <sup>53</sup>   | 0                  | 0           | 0               | 1             | 0                      |
| Mikalauskas, 2018 <sup>54</sup>      | 1                  | 0           | 0               | 1             | 0                      |
| Mikalauskas, 2012 <sup>55</sup>      | 1                  | 0           | 1               | 1             | 1                      |
| Ruitenburg, 2012 <sup>56</sup>       | 0                  | 0           | 0               | 1             | 1                      |
| van der Ploeg, 2003 <sup>57</sup>    | 0                  | 0           | 0               | 1             | 1                      |
| Meynaar, 2015 <sup>58</sup>          | 1                  | 0           | 0               | 1             | 1                      |
| van der Wal, 2016 <sup>59</sup>      | 0                  | 1           | 0               | 1             | 0                      |
| Twellaar, 2008 <sup>60</sup>         | 0                  | 1           | 0               | 1             | 1                      |
| Glebocka, 2017 <sup>61</sup>         | 1                  | 0           | 0               | 0             | 0                      |
| Maroco, 2016 <sup>62</sup>           | 1                  | 1           | 0               | 1             | 1                      |
| Marcelino, 2012 <sup>63</sup>        | 0                  | 0           | 0               | 1             | 1                      |
| Teixeira, 2013 <sup>64</sup>         | 0                  | 0           | 0               | 1             | 0                      |
| Hagau, 2012 <sup>65</sup>            | 0                  | 0           | 0               | 1             | 0                      |
| Stojanovic-Tasic, 2018 <sup>66</sup> | 0                  | 0           | 0               | 1             | 1                      |

| Source                                        | Representativeness | Sample Size | Non-respondents | Ascertainment | Descriptive Statistics |
|-----------------------------------------------|--------------------|-------------|-----------------|---------------|------------------------|
| Vicentic, 2013 <sup>67</sup>                  | 0                  | 0           | 0               | 1             | 0                      |
| Milenovic, 2016 <sup>68</sup>                 | 0                  | 0           | 0               | 1             | 1                      |
| Putnik, 2011 <sup>69</sup>                    | 0                  | 1           | 0               | 1             | 0                      |
| Yuguero Torres, 2015 <sup>70</sup>            | 0                  | 0           | 0               | 0             | 0                      |
| Yuguero, 2017 <sup>71</sup>                   | 1                  | 0           | 0               | 1             | 0                      |
| Chivato-Perez, 2011 <sup>72</sup>             | 0                  | 1           | 0               | 1             | 1                      |
| Frutos-Llanes, 2014 <sup>73</sup>             | 0                  | 0           | 0               | 1             | 1                      |
| Martínez de la Casa Muñoz, 2003 <sup>74</sup> | 1                  | 0           | 0               | 1             | 1                      |
| Vila Falgueras, 2014 <sup>75</sup>            | 0                  | 0           | 0               | 1             | 0                      |
| Atalaya, 2008 <sup>76</sup>                   | 0                  | 0           | 0               | 1             | 1                      |
| Riquelme, 2018 <sup>77</sup>                  | 1                  | 1           | 0               | 1             | 0                      |
| Yuguero, 2017 <sup>78</sup>                   | 0                  | 0           | 0               | 0             | 0                      |
| Escriba-Aguir, 2007 <sup>79</sup>             | 0                  | 1           | 0               | 1             | 0                      |
| Arigoni, 2009 <sup>80</sup>                   | 1                  | 1           | 0               | 1             | 0                      |
| Goehring, 2005 <sup>81</sup>                  | 1                  | 1           | 0               | 1             | 0                      |
| Merlani, 2011 <sup>82</sup>                   | 0                  | 1           | 0               | 1             | 0                      |
| Hammig, 2012 <sup>83</sup>                    | 0                  | 0           | 0               | 1             | 0                      |
| Upton, 2012 <sup>84</sup>                     | 1                  | 1           | 0               | 1             | 0                      |
| Orton, 2012 <sup>85</sup>                     | 0                  | 1           | 0               | 1             | 0                      |
| Taylor, 2005 <sup>86</sup>                    | 1                  | 1           | 0               | 1             | 0                      |
| Colville, 2017 <sup>87</sup>                  | 1                  | 0           | 0               | 1             | 0                      |
| Sharma, 2008 <sup>88</sup>                    | 0                  | 1           | 0               | 1             | 1                      |
| Soltanifar, 2018 <sup>89</sup>                | 0                  | 0           | 0               | 1             | 0                      |
| Ahmadpanah, 2015 <sup>90</sup>                | 0                  | 0           | 0               | 1             | 1                      |
| Kushnir, 2014 <sup>91</sup>                   | 0                  | 0           | 1               | 1             | 1                      |
| Al-Shoraian, 2011 <sup>92</sup>               | 1                  | 0           | 0               | 1             | 0                      |
| Hamdan, 2017 <sup>93</sup>                    | 0                  | 0           | 0               | 1             | 0                      |
| Abdulla, 2011 <sup>94</sup>                   | 0                  | 0           | 0               | 1             | 0                      |
| Al-Dubai, 2010 <sup>95</sup>                  | 1                  | 1           | 0               | 1             | 1                      |

| Source                            | Representativeness | Sample Size | Non-respondents | Ascertainment | Descriptive Statistics |
|-----------------------------------|--------------------|-------------|-----------------|---------------|------------------------|
| Amanullah, 2017 <sup>96</sup>     | 0                  | 0           | 0               | 0             | 0                      |
| Wright, 2014 <sup>97</sup>        | 0                  | 0           | 0               | 1             | 1                      |
| Helewa, 2013 <sup>98</sup>        | 0                  | 0           | 0               | 1             | 0                      |
| Lee, 2008 <sup>99</sup>           | 0                  | 0           | 0               | 1             | 0                      |
| Lloyd, 1994 <sup>100</sup>        | 0                  | 0           | 0               | 1             | 0                      |
| Elit, 2004 <sup>101</sup>         | 0                  | 0           | 0               | 1             | 0                      |
| Viviers, 2008 <sup>102</sup>      | 0                  | 0           | 0               | 0             | 1                      |
| Dyrbye, 2009 <sup>103</sup>       | 0                  | 0           | 0               | 1             | 1                      |
| Puffer, 2017 <sup>104</sup>       | 0                  | 1           | 1               | 1             | 0                      |
| Johns, 2005 <sup>105</sup>        | 0                  | 0           | 0               | 1             | 0                      |
| Gabbe, 2002 <sup>106</sup>        | 0                  | 0           | 0               | 1             | 1                      |
| Cruz OA, 2007 <sup>107</sup>      | 0                  | 0           | 0               | 1             | 1                      |
| De Oliveira, 2011 <sup>108</sup>  | 0                  | 0           | 0               | 1             | 0                      |
| Garcia, 2015 <sup>109</sup>       | 0                  | 0           | 0               | 1             | 1                      |
| Rao, 2017 <sup>110</sup>          | 0                  | 1           | 1               | 1             | 0                      |
| Shenoi, 2018 <sup>111</sup>       | 0                  | 0           | 1               | 0             | 0                      |
| Aggarwal, 2015 <sup>112</sup>     | 0                  | 0           | 0               | 1             | 0                      |
| Lu, 2015 <sup>113</sup>           | 0                  | 0           | 0               | 1             | 0                      |
| Rath, 2015 <sup>114</sup>         | 0                  | 1           | 0               | 0             | 0                      |
| Kroll, 2016 <sup>115</sup>        | 1                  | 0           | 0               | 1             | 1                      |
| Streu, 2014 <sup>116</sup>        | 0                  | 1           | 0               | 1             | 0                      |
| Jesse, 2015 <sup>117</sup>        | 0                  | 0           | 0               | 1             | 1                      |
| Bertges Yost, 2005 <sup>118</sup> | 0                  | 0           | 0               | 1             | 1                      |
| Shanafelt, 2014 <sup>119</sup>    | 0                  | 1           | 0               | 1             | 0                      |
| Golub, 2008 <sup>120</sup>        | 0                  | 1           | 0               | 1             | 0                      |
| Fletcher, 2012 <sup>121</sup>     | 0                  | 0           | 0               | 1             | 0                      |
| Simons, 2016 <sup>122</sup>       | 0                  | 0           | 0               | 1             | 0                      |
| Shanafelt, 2012 <sup>123</sup>    | 1                  | 1           | 0               | 1             | 0                      |
| Shanafelt, 2015 <sup>124</sup>    | 1                  | 1           | 0               | 1             | 0                      |
| Shanafelt, 2009 <sup>125</sup>    | 1                  | 1           | 0               | 1             | 0                      |



| Source                                   | Representativeness | Sample Size | Non-respondents | Ascertainment | Descriptive Statistics |
|------------------------------------------|--------------------|-------------|-----------------|---------------|------------------------|
| Busis, 2017 <sup>126</sup>               | 0                  | 1           | 0               | 1             | 1                      |
| Klimo, 2013 <sup>127</sup>               | 0                  | 0           | 0               | 1             | 0                      |
| McPhillips, 2007 <sup>128</sup>          | 0                  | 0           | 0               | 1             | 0                      |
| Contag, 2010 <sup>129</sup>              | 0                  | 0           | 0               | 1             | 0                      |
| Guest, 2011 <sup>130</sup>               | 0                  | 0           | 0               | 1             | 0                      |
| Evans, 2015 <sup>131</sup>               | 1                  | 0           | 0               | 1             | 0                      |
| Campbell, 2001 <sup>132</sup>            | 1                  | 1           | 0               | 1             | 0                      |
| Saleh, 2007 <sup>133</sup>               | 0                  | 0           | 0               | 1             | 0                      |
| Kamal, 2016 <sup>134</sup>               | 0                  | 1           | 0               | 1             | 0                      |
| Shanafelt, 2009 <sup>135</sup>           | 1                  | 1           | 0               | 1             | 0                      |
| Qureshi, 2014 <sup>136</sup>             | 0                  | 1           | 0               | 1             | 1                      |
| De Stefano, 2018 <sup>137</sup>          | 0                  | 0           | 0               | 1             | 0                      |
| Saleh, 2009 <sup>138</sup>               | 0                  | 0           | 0               | 1             | 0                      |
| Guntupalli, 1996 <sup>139</sup>          | 1                  | 0           | 0               | 1             | 1                      |
| West, 2013 <sup>140</sup>                | 0                  | 0           | 1               | 1             | 1                      |
| West, 2014 <sup>141</sup>                | 0                  | 1           | 0               | 1             | 0                      |
| Balch, 2011 <sup>142</sup>               | 1                  | 1           | 0               | 1             | 1                      |
| Gorelick, 2016 <sup>143</sup>            | 0                  | 1           | 0               | 1             | 0                      |
| Salmoirago-Blotcher, 2016 <sup>144</sup> | 0                  | 0           | 0               | 1             | 1                      |
| Tak, 2017 <sup>145</sup>                 | 1                  | 1           | 1               | 1             | 0                      |
| Weintraub, 2016 <sup>146</sup>           | 0                  | 1           | 0               | 1             | 0                      |
| Kase, 2017 <sup>147</sup>                | 0                  | 0           | 0               | 1             | 0                      |
| Yoon, 2010 <sup>148</sup>                | 0                  | 1           | 0               | 1             | 1                      |
| Chew, 2017 <sup>149</sup>                | 0                  | 1           | 0               | 1             | 0                      |
| Deckard, 1992 <sup>150</sup>             | 0                  | 1           | 0               | 1             | 0                      |
| Deckard, 1994 <sup>151</sup>             | 1                  | 0           | 0               | 1             | 0                      |
| Fields, 1995 <sup>152</sup>              | 1                  | 1           | 0               | 1             | 0                      |
| Hinami, 2012 <sup>153</sup>              | 1                  | 1           | 0               | 1             | 0                      |
| Jager, 2017 <sup>154</sup>               | 1                  | 1           | 1               | 1             | 1                      |

| Source                            | Representativeness | Sample Size | Non-respondents | Ascertainment | Descriptive Statistics |
|-----------------------------------|--------------------|-------------|-----------------|---------------|------------------------|
| Rohland, 2004 <sup>155</sup>      | 1                  | 0           | 0               | 1             | 1                      |
| Yoon, 2016 <sup>156</sup>         | 1                  | 1           | 0               | 1             | 0                      |
| Yoon, 2017 <sup>157</sup>         | 1                  | 1           | 0               | 1             | 0                      |
| Helfrich, 2013 <sup>158</sup>     | 0                  | 1           | 0               | 1             | 0                      |
| Starmer, 2016 <sup>159</sup>      | 0                  | 1           | 0               | 0             | 0                      |
| Doan-Wiggins, 1995 <sup>160</sup> | 0                  | 1           | 0               | 0             | 0                      |
| Johnson, 1993 <sup>161</sup>      | 0                  | 1           | 0               | 0             | 0                      |
| Glasheen, 2011 <sup>162</sup>     | 1                  | 0           | 0               | 0             | 0                      |
| Whippen, 1991 <sup>163</sup>      | 0                  | 1           | 0               | 0             | 0                      |
| Coleman, 2015 <sup>164</sup>      | 1                  | 1           | 0               | 0             | 1                      |
| Silver, 2017 <sup>165</sup>       | 1                  | 0           | 0               | 0             | 0                      |
| Allegra, 2005 <sup>166</sup>      | 1                  | 1           | 0               | 0             | 0                      |
| Pozdnyakova, 2018 <sup>167</sup>  | 0                  | 0           | 0               | 0             | 0                      |
| Dolan, 2014 <sup>168</sup>        | 0                  | 1           | 0               | 1             | 0                      |
| Stafford, 2010 <sup>169</sup>     | 0                  | 0           | 0               | 1             | 0                      |
| Ifediora, 2016 <sup>170</sup>     | 1                  | 0           | 0               | 1             | 0                      |
| Dunwoodie, 2007 <sup>171</sup>    | 1                  | 0           | 0               | 1             | 0                      |
| Kluger, 2003 <sup>172</sup>       | 0                  | 1           | 0               | 1             | 0                      |
| Winefield, 1991 <sup>173</sup>    | 0                  | 1           | 0               | 1             | 0                      |
| Pit, 2014 <sup>174</sup>          | 0                  | 0           | 0               | 1             | 0                      |
| Leung, 2015 <sup>175</sup>        | 0                  | 0           | 0               | 1             | 0                      |
| Surgenor, 2009 <sup>176</sup>     | 0                  | 0           | 0               | 1             | 1                      |
| Bruce, 2005 <sup>177</sup>        | 1                  | 0           | 0               | 1             | 0                      |
| Kumar, 2007 <sup>178</sup>        | 0                  | 0           | 0               | 1             | 0                      |
| Gil-Monte, 2008 <sup>179</sup>    | 0                  | 0           | 0               | 1             | 0                      |
| Barbosa, 2017 <sup>180</sup>      | 0                  | 0           | 0               | 1             | 1                      |
| Barbosa, 2012 <sup>181</sup>      | 0                  | 0           | 1               | 1             | 1                      |
| Garcia, 2014 <sup>182</sup>       | 0                  | 0           | 0               | 1             | 1                      |
| Barros, 2008 <sup>183</sup>       | 0                  | 0           | 0               | 1             | 1                      |
| Tironi, 2010 <sup>184</sup>       | 1                  | 0           | 0               | 1             | 1                      |

| Source                                    | Representativeness | Sample Size | Non-respondents | Ascertainment | Descriptive Statistics |
|-------------------------------------------|--------------------|-------------|-----------------|---------------|------------------------|
| Zanatta, 2015 <sup>185</sup>              | 0                  | 0           | 0               | 0             | 0                      |
| Govêia, 2018 <sup>186</sup>               | 0                  | 0           | 0               | 1             | 1                      |
| Aguirre Roldan, 2015 <sup>187</sup>       | 0                  | 0           | 0               | 1             | 1                      |
| Maticorena-Quevedo J, 2014 <sup>188</sup> | 1                  | 1           | 0               | 1             | 0                      |
| Burghi, 2016 <sup>189</sup>               | 0                  | 0           | 0               | 0             | 0                      |
| Arayago, 2016 <sup>190</sup>              | 0                  | 0           | 0               | 1             | 0                      |

**Legend:** Details regarding Newcastle-Ottawa risk-of-bias scoring are provided in eAppendix 2.

**eTable 4.** Summary of the Newcastle-Ottawa Risk-of-Bias Scores of the Studies

|                                     | No. of Studies | %     |
|-------------------------------------|----------------|-------|
| <b>Representativeness</b>           |                |       |
| 0 Points                            | 123            | 67.6% |
| 1 Point                             | 59             | 32.4% |
| <b>Sample Size</b>                  |                |       |
| 0 Points                            | 109            | 59.9% |
| 1 Point                             | 73             | 40.1% |
| <b>Non-respondents</b>              |                |       |
| 0 Points                            | 170            | 93.4% |
| 1 Point                             | 12             | 6.6%  |
| <b>Ascertainment</b>                |                |       |
| 0 Points                            | 22             | 12.1% |
| 1 Point                             | 160            | 87.9% |
| <b>Descriptive Statistics</b>       |                |       |
| 0 Points                            | 121            | 66.5% |
| 1 Point                             | 61             | 33.5% |
| <b>Total Newcastle-Ottawa Score</b> |                |       |
| 0 Points                            | 9              | 4.9%  |
| 1 Point                             | 50             | 27.5% |
| 2 Points                            | 68             | 37.4% |
| 3 Points                            | 43             | 23.6% |
| 4 Points                            | 10             | 5.5%  |
| 5 Points                            | 2              | 1.1%  |

**eTable 5.** Summary of the Depression Screening Instruments Used by the Studies

| <b>Depression Screening Method</b> | <b>No. of Studies</b> | <b>%</b> |
|------------------------------------|-----------------------|----------|
| Did Not Screen for Depression      | 149                   | 81.9%    |
| GHQ-12 $\geq$ 4                    | 14                    | 7.7%     |
| PRIME-MD $\geq$ 1                  | 9                     | 4.9%     |
| Positive Single-item Screen        | 2                     | 1.1%     |
| BDI-II $\geq$ 14                   | 1                     | 0.5%     |
| BDI $\geq$ 19                      | 1                     | 0.5%     |
| BSI $\geq$ 0.41                    | 1                     | 0.5%     |
| GHQ-12 $\geq$ 2                    | 1                     | 0.5%     |
| HADS $\geq$ 9                      | 1                     | 0.5%     |
| MDI $\geq$ 20                      | 1                     | 0.5%     |
| PHQ-9 $\geq$ 5                     | 1                     | 0.5%     |
| PRIME-MD $\geq$ 3                  | 1                     | 0.5%     |

**Abbreviations:** BDI, Beck Depression Inventory; BSI, Brief Symptom Inventory; HADS, Hospital Anxiety and Depression Scale; GHQ-12, 12-item General Health Questionnaire; MDI, Major Depression Inventory; PHQ-9, 9-item Patient Health Questionnaire; PRIME-MD, Primary Care Evaluation of Mental Disorders.

**eTable 6.** Meta-analysis of the Prevalence of Overall Burnout

| Study                                     | Prevalence (%) | LCI   | UCI   | %W(random) |
|-------------------------------------------|----------------|-------|-------|------------|
| Wu, 2013 <sup>12</sup>                    | 12.1%          | 10.3% | 14.0% | 0.9%       |
| Wang, 2014 <sup>13</sup>                  | 5.9%           | 3.9%  | 8.5%  | 0.9%       |
| Li, 2018 <sup>15</sup>                    | 69.7%          | 67.4% | 71.9% | 0.9%       |
| Nishimura, 2014 <sup>18</sup>             | 21.6%          | 20.0% | 23.2% | 0.9%       |
| Saijo, 2014 <sup>19</sup>                 | 22.1%          | 18.5% | 26.1% | 0.9%       |
| Wurm, 2016 <sup>27</sup>                  | 50.7%          | 49.4% | 52.0% | 0.9%       |
| Vandenbroeck, 2017 <sup>29</sup>          | 5.1%           | 3.9%  | 6.6%  | 0.9%       |
| Pedersen, 2013 <sup>33</sup>              | 2.6%           | 1.3%  | 4.8%  | 0.8%       |
| Pedersen, 2016 <sup>34</sup>              | 4.8%           | 3.6%  | 6.2%  | 0.9%       |
| Pedersen, 2018 <sup>35</sup>              | 25.0%          | 21.6% | 28.7% | 0.9%       |
| Brondt, 2008 <sup>36</sup>                | 2.6%           | 1.3%  | 4.8%  | 0.8%       |
| Lesage, 2013 <sup>37</sup>                | 11.8%          | 10.2% | 13.6% | 0.9%       |
| Pantenburg, 2016 <sup>43</sup>            | 10.9%          | 9.5%  | 12.5% | 0.9%       |
| O'Kelly, 2016 <sup>45</sup>               | 28.9%          | 25.2% | 32.8% | 0.9%       |
| van der Wal, 2016 <sup>29</sup>           | 19.8%          | 16.5% | 23.6% | 0.9%       |
| Twellaar, 2008 <sup>60</sup>              | 19.5%          | 15.5% | 24.0% | 0.9%       |
| Maroco, 2016 <sup>62</sup>                | 43.6%          | 39.0% | 48.2% | 0.9%       |
| Riquelme, 2018 <sup>77</sup>              | 7.3%           | 4.6%  | 10.9% | 0.9%       |
| Arigoni, 2009 <sup>80</sup>               | 6.0%           | 3.8%  | 8.9%  | 0.9%       |
| Goehring, 2005 <sup>81</sup>              | 3.5%           | 2.7%  | 4.5%  | 0.9%       |
| Upton, 2012 <sup>84</sup>                 | 19.8%          | 15.5% | 24.7% | 0.9%       |
| Al-Dubai, 2010 <sup>95</sup>              | 11.7%          | 9.2%  | 14.7% | 0.9%       |
| Puffer, 2017 <sup>104</sup>               | 24.5%          | 22.7% | 26.4% | 0.9%       |
| Rao, 2017 <sup>110</sup>                  | 9.8%           | 8.5%  | 11.3% | 0.9%       |
| Shanafelt, 2014 <sup>119</sup>            | 44.7%          | 41.7% | 47.7% | 0.9%       |
| Golub, 2008 <sup>120</sup>                | 4.0%           | 2.2%  | 6.6%  | 0.8%       |
| Shanafelt, 2012 <sup>123</sup>            | 45.4%          | 44.3% | 46.6% | 0.9%       |
| Shanafelt, 2015 <sup>124</sup>            | 54.4%          | 53.2% | 55.6% | 0.9%       |
| Shanafelt, 2009 <sup>125</sup>            | 34.0%          | 29.7% | 38.5% | 0.9%       |
| Buis, 2017 <sup>126</sup>                 | 60.1%          | 57.7% | 62.5% | 0.9%       |
| Kamal, 2015 <sup>134</sup>                | 61.9%          | 58.2% | 65.6% | 0.9%       |
| Shanafelt, 2009 <sup>135</sup>            | 39.6%          | 38.5% | 40.7% | 0.9%       |
| Qureshi, 2015 <sup>136</sup>              | 29.7%          | 27.4% | 32.0% | 0.9%       |
| Maticorena-Quevedo J, 2014 <sup>188</sup> | 3.7%           | 2.9%  | 4.6%  | 0.9%       |
| Massou, 2013 <sup>9</sup>                 | 52.9%          | 38.5% | 67.1% | 0.8%       |
| Margaryan, 2010 <sup>10</sup>             | 18.3%          | 11.9% | 26.4% | 0.8%       |
| Xiao, 2014 <sup>11</sup>                  | 25.4%          | 19.6% | 31.9% | 0.9%       |
| Siu, 2012 <sup>14</sup>                   | 31.4%          | 25.4% | 37.9% | 0.9%       |
| Das, 2016 <sup>16</sup>                   | 0.0%           | 0.0%  | 60.2% | 0.2%       |
| See, 2016 <sup>23</sup>                   | 31.1%          | 18.2% | 46.7% | 0.8%       |
| Lamothe, 2014 <sup>39</sup>               | 3.4%           | 1.6%  | 6.2%  | 0.8%       |
| Embriaco, 2007 <sup>40</sup>              | 13.9%          | 11.2% | 16.9% | 0.9%       |
| Mattei, 2017 <sup>50</sup>                | 28.6%          | 18.9% | 40.0% | 0.8%       |
| Volpe, 2014 <sup>51</sup>                 | 52.0%          | 37.4% | 66.3% | 0.8%       |
| Mikalaukas, 2018 <sup>54</sup>            | 10.9%          | 7.1%  | 15.8% | 0.9%       |
| Mikalaukas, 2012 <sup>55</sup>            | 62.7%          | 49.2% | 75.0% | 0.8%       |

| <b>Study</b>                                  | <b>Prevalence (%)</b> | <b>LCI</b> | <b>UCI</b> | <b>%W(random)</b> |
|-----------------------------------------------|-----------------------|------------|------------|-------------------|
| Ruitenburg, 2012 <sup>56</sup>                | 6.1%                  | 3.3%       | 10.2%      | 0.8%              |
| van der Ploeg, 2003 <sup>57</sup>             | 21.4%                 | 13.2%      | 31.7%      | 0.8%              |
| Meynaar, 2015 <sup>58</sup>                   | 4.4%                  | 2.3%       | 7.6%       | 0.8%              |
| Marcelino, 2012 <sup>63</sup>                 | 2.0%                  | 0.4%       | 5.7%       | 0.6%              |
| Teixeira, 2013 <sup>64</sup>                  | 24.7%                 | 15.3%      | 36.1%      | 0.8%              |
| Milenovic, 2016 <sup>68</sup>                 | 6.3%                  | 3.4%       | 10.6%      | 0.8%              |
| Yuguro Torres, 2015 <sup>70</sup>             | 6.5%                  | 2.7%       | 12.9%      | 0.7%              |
| Yuguro, 2017 <sup>71</sup>                    | 6.6%                  | 3.1%       | 12.2%      | 0.8%              |
| Frutos-Llanes, 2014 <sup>73</sup>             | 16.3%                 | 10.6%      | 23.5%      | 0.8%              |
| Martínez de la Casa Muñoz, 2003 <sup>74</sup> | 76.4%                 | 68.6%      | 83.1%      | 0.9%              |
| Vila Falgueras, 2014 <sup>75</sup>            | 49.5%                 | 43.6%      | 55.4%      | 0.9%              |
| Yuguro, 2017 <sup>78</sup>                    | 34.9%                 | 21.0%      | 50.9%      | 0.8%              |
| Merlani, 2011 <sup>82</sup>                   | 31.2%                 | 26.9%      | 35.6%      | 0.9%              |
| Hammig, 2012 <sup>83</sup>                    | 32.1%                 | 19.9%      | 46.3%      | 0.8%              |
| Colville, 2017 <sup>87</sup>                  | 48.7%                 | 36.9%      | 60.6%      | 0.8%              |
| Kushnir, 2014 <sup>91</sup>                   | 55.9%                 | 47.1%      | 64.4%      | 0.9%              |
| Al-Shoraian, 2011 <sup>92</sup>               | 20.5%                 | 15.1%      | 26.8%      | 0.9%              |
| Hamdan, 2017 <sup>93</sup>                    | 9.9%                  | 5.5%       | 16.0%      | 0.8%              |
| Abdulla, 2011 <sup>94</sup>                   | 12.6%                 | 8.1%       | 18.3%      | 0.9%              |
| Helewa, 2013 <sup>98</sup>                    | 61.1%                 | 35.8%      | 82.7%      | 0.7%              |
| Dyrbye, 2009 <sup>103</sup>                   | 61.8%                 | 50.0%      | 72.8%      | 0.8%              |
| Johns, 2005 <sup>105</sup>                    | 2.8%                  | 0.6%       | 8.0%       | 0.6%              |
| Gabbe, 2002 <sup>106</sup>                    | 4.2%                  | 1.4%       | 9.5%       | 0.7%              |
| Cruz OA, 2007 <sup>107</sup>                  | 8.9%                  | 4.2%       | 16.2%      | 0.8%              |
| De Oliveira, 2011 <sup>108</sup>              | 20.8%                 | 13.2%      | 30.3%      | 0.8%              |
| Shenoi, 2018 <sup>111</sup>                   | 21.4%                 | 16.5%      | 27.0%      | 0.9%              |
| Aggarwal, 2015 <sup>112</sup>                 | 6.4%                  | 1.3%       | 17.5%      | 0.6%              |
| Lu, 2015 <sup>113</sup>                       | 50.0%                 | 36.1%      | 63.9%      | 0.8%              |
| Rath, 2015 <sup>114</sup>                     | 32.0%                 | 27.3%      | 37.0%      | 0.9%              |
| Fletcher, 2012 <sup>121</sup>                 | 3.5%                  | 1.0%       | 8.7%       | 0.7%              |
| Simons, 2016 <sup>122</sup>                   | 16.7%                 | 2.1%       | 48.4%      | 0.5%              |
| Klimo, 2013 <sup>127</sup>                    | 27.2%                 | 17.9%      | 38.2%      | 0.8%              |
| McPhillips, 2007 <sup>128</sup>               | 19.7%                 | 13.4%      | 27.4%      | 0.9%              |
| Contag, 2010 <sup>129</sup>                   | 1.7%                  | 0.0%       | 8.9%       | 0.4%              |
| Guest, 2011 <sup>130</sup>                    | 42.3%                 | 30.6%      | 54.6%      | 0.8%              |
| Evans, 2015 <sup>131</sup>                    | 57.5%                 | 48.4%      | 66.2%      | 0.9%              |
| De Stefano, 2018 <sup>137</sup>               | 4.4%                  | 0.1%       | 22.0%      | 0.4%              |
| West, 2013 <sup>140</sup>                     | 28.7%                 | 23.5%      | 34.4%      | 0.9%              |
| West, 2014 <sup>141</sup>                     | 29.3%                 | 25.0%      | 33.8%      | 0.9%              |
| Balch, 2011 <sup>142</sup>                    | 26.7%                 | 25.7%      | 27.8%      | 0.9%              |
| Salmoirago-Blotcher, 2016 <sup>144</sup>      | 26.8%                 | 19.6%      | 35.0%      | 0.9%              |
| Tak, 2017 <sup>145</sup>                      | 45.5%                 | 42.8%      | 48.3%      | 0.9%              |
| Weintraub, 2016 <sup>146</sup>                | 20.8%                 | 17.1%      | 24.9%      | 0.9%              |
| Kase, 2017 <sup>147</sup>                     | 14.7%                 | 8.5%       | 23.1%      | 0.8%              |
| Chew, 2017 <sup>149</sup>                     | 80.5%                 | 76.3%      | 84.2%      | 0.9%              |
| Fields, 1995 <sup>152</sup>                   | 14.1%                 | 10.8%      | 18.0%      | 0.9%              |
| Hinami, 2012 <sup>153</sup>                   | 30.0%                 | 26.8%      | 33.4%      | 0.9%              |
| Jager, 2017 <sup>154</sup>                    | 28.5%                 | 26.7%      | 30.5%      | 0.9%              |

| Study                               | Prevalence (%)   | LCI      | UCI            | %W(random) |
|-------------------------------------|------------------|----------|----------------|------------|
| Rohland, 2004 <sup>155</sup>        | 22.7%            | 18.1%    | 27.9%          | 0.9%       |
| Yoon, 2016 <sup>156</sup>           | 22.9%            | 20.5%    | 25.5%          | 0.9%       |
| Yoon, 2017 <sup>157</sup>           | 20.6%            | 18.4%    | 23.0%          | 0.9%       |
| Starmer, 2016 <sup>159</sup>        | 30.0%            | 26.9%    | 33.3%          | 0.9%       |
| Doan-Wiggins, 1995 <sup>160</sup>   | 25.2%            | 22.1%    | 28.5%          | 0.9%       |
| Johnson, 1993 <sup>161</sup>        | 33.7%            | 28.9%    | 38.7%          | 0.9%       |
| Glasheen, 2011 <sup>162</sup>       | 23.4%            | 18.4%    | 29.0%          | 0.9%       |
| Whippen, 1991 <sup>163</sup>        | 56.2%            | 52.1%    | 60.3%          | 0.9%       |
| Coleman, 2015 <sup>164</sup>        | 25.0%            | 22.4%    | 27.8%          | 0.9%       |
| Silver, 2017 <sup>165</sup>         | 45.5%            | 34.8%    | 56.4%          | 0.9%       |
| Allegra, 2005 <sup>166</sup>        | 61.7%            | 59.3%    | 64.0%          | 0.9%       |
| Pozdnyakova, 2018 <sup>167</sup>    | 16.7%            | 0.4%     | 64.1%          | 0.3%       |
| Helfrich, 2013 <sup>158</sup>       | 45.5%            | 43.1%    | 47.8%          | 0.9%       |
| Dunwoodie, 2007 <sup>171</sup>      | 25.0%            | 12.7%    | 41.2%          | 0.8%       |
| Leung, 2015 <sup>175</sup>          | 2.7%             | 1.0%     | 5.8%           | 0.7%       |
| Surgenor, 2009 <sup>176</sup>       | 19.5%            | 14.9%    | 24.7%          | 0.9%       |
| Bruce, 2005 <sup>177</sup>          | 10.0%            | 3.3%     | 21.8%          | 0.7%       |
| Gil-Monte, 2008 <sup>179</sup>      | 10.6%            | 5.8%     | 17.4%          | 0.8%       |
| Barbosa, 2017 <sup>180</sup>        | 9.3%             | 2.6%     | 22.1%          | 0.6%       |
| Barbosa, 2012 <sup>181</sup>        | 17.9%            | 9.6%     | 29.2%          | 0.8%       |
| Garcia, 2014 <sup>182</sup>         | 50.0%            | 37.8%    | 62.2%          | 0.8%       |
| Barros, 2008 <sup>183</sup>         | 7.4%             | 4.7%     | 11.0%          | 0.9%       |
| Tironi, 2010 <sup>184</sup>         | 7.4%             | 4.7%     | 11.0%          | 0.9%       |
| Zanatta, 2015 <sup>185</sup>        | 5.6%             | 0.7%     | 18.7%          | 0.5%       |
| Govêia, 2018 <sup>186</sup>         | 2.4%             | 0.1%     | 12.9%          | 0.4%       |
| Aguirre Roldan, 2015 <sup>187</sup> | 3.8%             | 1.0%     | 9.4%           | 0.7%       |
| Burghi, 2016 <sup>189</sup>         | 51.2%            | 39.9%    | 62.4%          | 0.9%       |
| Arayago, 2016 <sup>190</sup>        | 55.9%            | 37.9%    | 72.8%          | 0.8%       |
|                                     |                  |          |                |            |
| Number of studies combined:         | k = 122          |          |                |            |
|                                     |                  |          |                |            |
| Random effects model                | 21.3%            | 18.9%    | 24.0%          |            |
|                                     |                  |          |                |            |
| Quantifying heterogeneity:          | $\tau^2 = 0.658$ | H = 9.37 | $I^2 = 98.9\%$ |            |
|                                     |                  |          |                |            |
| Test of heterogeneity:              |                  |          |                |            |
|                                     | Q                | d.f.     | p-value        |            |
|                                     | 10613            | 121      | <0.0001        |            |

**Abbreviations:** d.f., degrees of freedom; H, square root of the  $\chi^2$  statistic divided by its degrees of freedom;  $I^2$ , a transformation of H describing the proportion of total variation in study estimates secondary to heterogeneity; k, number of studies; LCI, lower 95% confidence interval;  $\tau^2$ , between-study variance; UCI, upper 95% confidence interval; Q, Cochran's heterogeneity statistic; %W, percentage weight in the random effects meta-analysis. Note that these abbreviations are also used in subsequent tables.



**eTable 7.** Meta-analysis of the Prevalence of Overall Burnout Stratified by Assessment Method

| Definition of Overall Burnout                                          | k  | Prevalence (%) | LCI   | UCI   | Q   | $\tau^2$ | $I^2$ |
|------------------------------------------------------------------------|----|----------------|-------|-------|-----|----------|-------|
| (MBI-EE + MBI-DP + MBI-PA)≥47                                          | 1  | 34.9%          | 22.3% | 50.1% | 0   | --       | --    |
| (UBOS-EE High and UBOS-DP High) and/or UBOS-PA Low                     | 1  | 21.4%          | 13.9% | 31.5% | 0   | --       | --    |
| aMBI-EE≥27 and aMBI-DP≥10 and aMBI-PA≤31                               | 1  | 20.8%          | 13.9% | 30.1% | 0   | --       | --    |
| aMBI-EE≥27 and aMBI-DP≥10 and aMBI-PA≤33                               | 2  | 3.6%           | 1.8%  | 7.1%  | 0   | 0.0      | 0.0 % |
| aMBI-EE≥27 and aMBI-DP≥13 and aMBI-PA≤31                               | 1  | 8.9%           | 4.7%  | 16.3% | 0   | --       | --    |
| aMBI-EE≥27 and/or aMBI-DP≥10                                           | 1  | 48.7%          | 37.5% | 59.9% | 0   | --       | --    |
| AMBQ>19                                                                | 1  | 12.6%          | 8.5%  | 18.2% | 0   | --       | --    |
| Average CBI Subscale≥50                                                | 1  | 32.1%          | 21.0% | 45.7% | 0   | --       | --    |
| CESQT-EE>Top Tertile and CESQT-DP>Top Tertile and CESQT-PA>Top Tertile | 1  | 3.8%           | 1.4%  | 9.6%  | 0   | --       | --    |
| CFST>"High-End" Cutoff                                                 | 1  | 20.8%          | 17.2% | 24.9% | 0   | --       | --    |
| CFST>"Natural High-End Cut Point"                                      | 1  | 14.7%          | 9.1%  | 23.0% | 0   | --       | --    |
| Chinese MBI-HSS≥4.5                                                    | 1  | 5.9%           | 4.1%  | 8.5%  | 0   | --       | --    |
| HBI≥145                                                                | 1  | 50.7%          | 49.4% | 52.0% | 0   | --       | --    |
| MBI-EE High and (MBI-DP High and/or MBI-PA Low)                        | 1  | 21.4%          | 16.8% | 26.9% | 0   | --       | --    |
| MBI-EE High and MBI-DP High and MBI-PA Low                             | 2  | 9.1%           | 5.7%  | 14.2% | 1   | 0.0      | 0.0 % |
| MBI-EE High and/or MBI-DP High                                         | 3  | 47.2%          | 28.3% | 67.0% | 26  | 0.5      | 92.2% |
| MBI-EE≥19 and/or MBI-DP≥6 and/or MBI-PA≤39                             | 1  | 55.9%          | 39.2% | 71.4% | 0   | --       | --    |
| MBI-EE≥24 and/or MBI-DP≥9                                              | 1  | 28.6%          | 19.6% | 39.6% | 0   | --       | --    |
| MBI-EE≥25 and MBI-DP≥10 and MBI-PA≤32                                  | 1  | 24.7%          | 16.1% | 35.8% | 0   | --       | --    |
| MBI-EE≥26 and MBI-DP≥9 and MBI-PA≤33                                   | 1  | 2.4%           | 0.3%  | 15.4% | 0   | --       | --    |
| MBI-EE≥27 and (MBI-DP≥10 and/or MBI-PA≤33)                             | 1  | 19.5%          | 15.2% | 24.7% | 0   | --       | --    |
| MBI-EE≥27 and (MBI-DP≥13 and/or MBI-PA≤31)                             | 1  | 28.9%          | 25.3% | 32.7% | 0   | --       | --    |
| MBI-EE≥27 and MBI-DP≥10 and MBI-PA≤31                                  | 1  | 10.9%          | 7.4%  | 15.8% | 0   | --       | --    |
| MBI-EE≥27 and MBI-DP≥10 and MBI-PA≤32                                  | 1  | 2.7%           | 1.2%  | 5.9%  | 0   | --       | --    |
| MBI-EE≥27 and MBI-DP≥10 and MBI-PA≤33                                  | 21 | 8.6%           | 6.0%  | 12.2% | 481 | 0.7      | 95.8% |
| MBI-EE≥27 and MBI-DP≥13 and MBI-PA≤31                                  | 5  | 8.8%           | 6.7%  | 11.3% | 9   | 0.1      | 53.9% |
| MBI-EE≥27 and/or MBI-DP≥10                                             | 11 | 40.0%          | 34.4% | 45.8% | 433 | 0.1      | 97.7% |
| MBI-EE≥27 and/or MBI-DP≥10 and/or MBI-PA≤33                            | 2  | 63.8%          | 35.3% | 85.0% | 27  | 0.7      | 96.3% |

| Definition of Overall Burnout                                                                             | k | Prevalence (%) | LCI   | UCI   | Q   | $\tau^2$ | $I^2$ |
|-----------------------------------------------------------------------------------------------------------|---|----------------|-------|-------|-----|----------|-------|
| MBI-EE $\geq$ 27 and/or MBI-DP $\geq$ 10 and/or MBI-PA $\leq$ 33                                          | 1 | 61.1%          | 37.9% | 80.2% | 0   | --       | --    |
| MBI-EE $\geq$ 27 and/or MBI-DP $\geq$ 13                                                                  | 2 | 66.0%          | 58.1% | 73.2% | 13  | 0.1      | 92.5% |
| MBI-EE $\geq$ 27 and/or MBI-DP $\geq$ 13 and/or MBI-PA $\leq$ 30                                          | 1 | 50.0%          | 38.5% | 61.5% | 0   | --       | --    |
| MBI-EE $\geq$ 27 and/or MBI-PA $\geq$ 13                                                                  | 1 | 57.5%          | 48.7% | 65.8% | 0   | --       | --    |
| MBI-EE $\geq$ 28 and MBI-DP $\geq$ 14 and MBI-PA $\leq$ 29                                                | 1 | 4.4%           | 0.6%  | 25.2% | 0   | --       | --    |
| MBI-EE $\geq$ 28 and/or MBI-DP $\geq$ 11                                                                  | 2 | 34.5%          | 25.5% | 44.8% | 54  | 0.1      | 98.1% |
| MBI-EE $\geq$ 28 and/or MBI-DP $\geq$ 11 and/or MBI-PA $\leq$ 32                                          | 1 | 62.7%          | 49.8% | 74.0% | 0   | --       | --    |
| MBI-EE $\geq$ 30 and MBI $\geq$ 12 and MBI-PA $\leq$ 33                                                   | 1 | 10.0%          | 0.6%  | 67.4% | 0   | --       | --    |
| MBI-EE>Top Quartile and MBI-DP>Top Quartile and MBI-PA<Lowest Quartile                                    | 2 | 7.1%           | 4.8%  | 10.4% | 0   | 0.0      | 0.0%  |
| MBI-EX $\geq$ 14 and MBI-CY $\geq$ 10 and MBI-PE $\leq$ 17                                                | 1 | 12.1%          | 10.3% | 14.0% | 0   | --       | --    |
| MBI-EX $\geq$ 14 and/or MBI-CY $\geq$ 10 and/or MBI-PE $\leq$ 17                                          | 1 | 25.4%          | 19.9% | 31.8% | 0   | --       | --    |
| MBI-EX $\geq$ 3.2 and MBI-CY $\geq$ 2.6 and MBI-PE $\leq$ 3.8                                             | 1 | 9.8%           | 8.5%  | 11.3% | 0   | --       | --    |
| MBI-EX>4.0 and (MBI-CY>2.6 and/or MBI-PE<4.17)                                                            | 1 | 21.6%          | 20.0% | 23.2% | 0   | --       | --    |
| MBI-EX>4.2 and (MBI-CY>2.4 and/or MBI-PE<2.5)                                                             | 1 | 22.1%          | 18.7% | 26.0% | 0   | --       | --    |
| MBI-EX>Top Tertile and MBI-CY>Top Tertile                                                                 | 1 | 19.8%          | 15.8% | 24.6% | 0   | --       | --    |
| MBI (Specific Criteria Not Stated)                                                                        | 3 | 15.2%          | 2.5%  | 55.9% | 53  | 2.9      | 96.2% |
| MBI Global Mean Score $\geq$ 30                                                                           | 1 | 3.4%           | 1.8%  | 6.2%  | 0   | --       | --    |
| MBI $\geq$ -8 to $\leq$ 34                                                                                | 3 | 29.5%          | 14.2% | 51.5% | 75  | 0.7      | 97.3% |
| Mini-Z $\geq$ 3                                                                                           | 1 | 24.5%          | 22.7% | 26.4% | 0   | --       | --    |
| Modified MBI Average Subscale Score $\geq$ 3                                                              | 1 | 43.6%          | 39.1% | 48.1% | 0   | --       | --    |
| Personal Burnout $\geq$ 50 and/or Work-Related Burnout $\geq$ 50 and/or Patient-Related Burnout $\geq$ 50 | 1 | 31.1%          | 19.4% | 45.9% | 0   | --       | --    |
| Pines and Aronson Burnout Measure Score>4                                                                 | 1 | 14.1%          | 11.0% | 18.0% | 0   | --       | --    |
| Positive Single-item Screen                                                                               | 9 | 35.7%          | 24.6% | 48.6% | 602 | 0.6      | 98.7% |
| Rohland et al. Score $\geq$ 3                                                                             | 6 | 27.9%          | 20.7% | 36.4% | 277 | 0.2      | 98.2% |
| Single-item MBI-EE $\geq$ 27 and/or Single-item MBI-DP $\geq$ 10 and/or 5-item MBI-PA $\leq$ 33           | 1 | 80.5%          | 76.3% | 84.1% | 0   | --       | --    |
| Single-item MBI-EE $\geq$ 4 and/or Single-item MBI-DP $\geq$ 4                                            | 5 | 31.2%          | 22.9% | 41.0% | 180 | 0.2      | 97.8% |
| UBOS-EE $\geq$ 2.38 and (UBOS-DP $\geq$ 1.6 [women]/1.8 [men] and/or UBOS-PA $\leq$ 3.7)                  | 1 | 4.4%           | 2.5%  | 7.6%  | 0   | --       | --    |

| <b>Definition of Overall Burnout</b>                                                              | <b>k</b> | <b>Prevalence (%)</b> | <b>LCI</b>  | <b>UCI</b> | <b>Q</b> | <b><math>\tau^2</math></b> | <b><math>I^2</math></b> |
|---------------------------------------------------------------------------------------------------|----------|-----------------------|-------------|------------|----------|----------------------------|-------------------------|
| UBOS-EE $\geq$ 2.5 and UBOS-DP $\geq$ 1.6 (women)/UBOS-DP $\geq$ 1.8 (men) and UBOS-PA $\leq$ 3.7 | 1        | 5.1%                  | 4.0%        | 6.6%       | 0        | --                         | --                      |
| UBOS-EE $\geq$ 27 and UBOS-DP $\geq$ 10                                                           | 1        | 6.1%                  | 3.6%        | 10.2%      | 0        | --                         | --                      |
| UBOS-EE>Top Quartile and (UBOS-DP>Top Quartile and/or UBOS-PA<Lowest Quartile)                    | 2        | 19.7%                 | 17.2%       | 22.5%      | 0        | 0                          | 0.0%                    |
|                                                                                                   |          |                       |             |            |          |                            |                         |
| Test for subgroup differences:                                                                    |          |                       |             |            |          |                            |                         |
|                                                                                                   | Q        | d.f.                  | p-value     |            |          |                            |                         |
| Between groups                                                                                    | 34<br>06 | 57                    | <0.00<br>01 |            |          |                            |                         |

**eTable 8.** Assessment Tools and Cutoff Scores for Defining Burnout or Burnout Subcomponent Prevalence Used by the Studies

|                                                                                | No. of Studies | %     |
|--------------------------------------------------------------------------------|----------------|-------|
| <b>Definition of Overall Burnout</b>                                           |                |       |
| Did Not Report Overall Burnout Prevalence                                      | 60             | 32.1% |
| MBI-EE $\geq$ 27 and MBI-DP $\geq$ 10 and MBI-PA $\leq$ 33                     | 21             | 11.2% |
| MBI-EE $\geq$ 27 and/or MBI-DP $\geq$ 10                                       | 11             | 5.9%  |
| Positive Single-item Screen                                                    | 9              | 4.8%  |
| MBI-EE $\geq$ 27 and MBI-DP $\geq$ 13 and MBI-PA $\leq$ 31                     | 5              | 2.7%  |
| Rohland et al. Score $\geq$ 3                                                  | 6              | 3.2%  |
| Single-item MBI-EE $\geq$ 4 and/or Single-item MBI-DP $\geq$ 4                 | 5              | 2.7%  |
| MBI (Specific Criteria Not Stated)                                             | 3              | 1.6%  |
| MBI $\geq$ -8 to $\leq$ 34                                                     | 3              | 1.6%  |
| MBI-EE High and/or MBI-DP High                                                 | 3              | 1.6%  |
| aMBI-EE $\geq$ 27 and aMBI-DP $\geq$ 10 and aMBI-PA $\leq$ 33                  | 2              | 1.1%  |
| MBI-EE High and MBI-DP High and MBI-PA Low                                     | 2              | 1.1%  |
| MBI-EE>Top Quartile and MBI-DP>Top Quartile and MBI-PA<Lowest Quartile         | 2              | 1.1%  |
| MBI-EE $\geq$ 27 and/or MBI-DP $\geq$ 10 and/or MBI-PA $\leq$ 33               | 2              | 1.1%  |
| MBI-EE $\geq$ 27 and/or MBI-DP $\geq$ 13                                       | 2              | 1.1%  |
| MBI-EE $\geq$ 28 and/or MBI-DP $\geq$ 11                                       | 2              | 1.1%  |
| UBOS-EE>Top Quartile and (UBOS-DP>Top Quartile and/or UBOS-PA<Lowest Quartile) | 2              | 1.1%  |
| (MBI-EE + MBI-DP + MBI-PA) $\geq$ 47                                           | 1              | 0.5%  |
| (UBOS-EE High and UBOS-DP High) and/or UBOS-PA Low                             | 1              | 0.5%  |
| aMBI-EE $\geq$ 27 and aMBI-DP $\geq$ 10 and aMBI-PA $\leq$ 31                  | 1              | 0.5%  |
| aMBI-EE $\geq$ 27 and aMBI-DP $\geq$ 13 and aMBI-PA $\leq$ 31                  | 1              | 0.5%  |
| aMBI-EE $\geq$ 27 and/or aMBI-DP $\geq$ 10                                     | 1              | 0.5%  |
| AMBQ>19                                                                        | 1              | 0.5%  |
| Average CBI Subscale $\geq$ 50                                                 | 1              | 0.5%  |
| CESQT-EE>Top Tertile and CESQT-DP>Top Tertile and CESQT-PA>Top Tertile         | 1              | 0.5%  |
| CFST>"High-End" Cutoff                                                         | 1              | 0.5%  |

|                                                                                                           | No. of Studies | %    |
|-----------------------------------------------------------------------------------------------------------|----------------|------|
| CFST>"Natural High-End Cut Point"                                                                         | 1              | 0.5% |
| Chinese MBI-HSS $\geq$ 4.5                                                                                | 1              | 0.5% |
| HBI $\geq$ 145                                                                                            | 1              | 0.5% |
| MBI Global Mean Score $\geq$ 30                                                                           | 1              | 0.5% |
| MBI-EE High and (MBI-DP High and/or MBI-PA Low)                                                           | 1              | 0.5% |
| MBI-EE $\geq$ 19 and/or MBI-DP $\geq$ 6 and/or MBI-PA $\leq$ 39                                           | 1              | 0.5% |
| MBI-EE $\geq$ 24 and/or MBI-DP $\geq$ 9                                                                   | 1              | 0.5% |
| MBI-EE $\geq$ 25 and MBI-DP $\geq$ 10 and MBI-PA $\leq$ 32                                                | 1              | 0.5% |
| MBI-EE $\geq$ 26 and MBI-DP $\geq$ 9 and MBI-PA $\leq$ 33                                                 | 1              | 0.5% |
| MBI-EE $\geq$ 27 and (MBI-DP $\geq$ 10 and/or MBI-PA $\leq$ 33)                                           | 1              | 0.5% |
| MBI-EE $\geq$ 27 and (MBI-DP $\geq$ 13 and/or MBI-PA $\leq$ 31)                                           | 1              | 0.5% |
| MBI-EE $\geq$ 27 and MBI-DP $\geq$ 10 and MBI-PA $\leq$ 31                                                | 1              | 0.5% |
| MBI-EE $\geq$ 27 and MBI-DP $\geq$ 10 and MBI-PA $\leq$ 32                                                | 1              | 0.5% |
| MBI-EE $\geq$ 27 and/or MBI-DP $\geq$ 10 and/or MBI-PA $\leq$ 33                                          | 1              | 0.5% |
| MBI-EE $\geq$ 27 and/or MBI-DP $\geq$ 13 and/or MBI-PA $\leq$ 30                                          | 1              | 0.5% |
| MBI-EE $\geq$ 27 and/or MBI-PA $\geq$ 13                                                                  | 1              | 0.5% |
| MBI-EE $\geq$ 28 and MBI-DP $\geq$ 14 and MBI-PA $\leq$ 29                                                | 1              | 0.5% |
| MBI-EE $\geq$ 28 and/or MBI-DP $\geq$ 11 and/or MBI-PA $\leq$ 32                                          | 1              | 0.5% |
| MBI-EE $\geq$ 30 and MBI $\geq$ 12 and MBI-PA $\leq$ 33                                                   | 1              | 0.5% |
| MBI-EX $>$ 4.0 and (MBI-CY $>$ 2.6 and/or MBI-PE $<$ 4.17)                                                | 1              | 0.5% |
| MBI-EX $>$ 4.2 and (MBI-CY $>$ 2.4 and/or MBI-PE $<$ 2.5)                                                 | 1              | 0.5% |
| MBI-EX $>$ Top Tertile and MBI-CY $>$ Top Tertile                                                         | 1              | 0.5% |
| MBI-EX $\geq$ 14 and MBI-CY $\geq$ 10 and MBI-PE $\leq$ 17                                                | 1              | 0.5% |
| MBI-EX $\geq$ 14 and/or MBI-CY $\geq$ 10 and/or MBI-PE $\leq$ 17                                          | 1              | 0.5% |
| MBI-EX $\geq$ 3.2 and MBI-CY $\geq$ 2.6 and MBI-PE $\leq$ 3.8                                             | 1              | 0.5% |
| Mini-Z $\geq$ 3                                                                                           | 1              | 0.5% |
| Modified MBI Average Subscale Score $\geq$ 3                                                              | 1              | 0.5% |
| Personal Burnout $\geq$ 50 and/or Work-Related Burnout $\geq$ 50 and/or Patient-Related Burnout $\geq$ 50 | 1              | 0.5% |
| Pines and Aronson Burnout Measure Score $>$ 4                                                             | 1              | 0.5% |
| Single-item MBI-EE $\geq$ 27 and/or Single-item MBI-DP $\geq$ 10 and/or 5-item MBI-PA $\leq$ 33           | 1              | 0.5% |

|                                                                                                   | No. of Studies | %     |
|---------------------------------------------------------------------------------------------------|----------------|-------|
| UBOS-EE $\geq$ 2.38 and (UBOS-DP $\geq$ 1.6 [women]/1.8 [men] and/or UBOS-PA $\leq$ 3.7)          | 1              | 0.5%  |
| UBOS-EE $\geq$ 2.5 and UBOS-DP $\geq$ 1.6 (women)/UBOS-DP $\geq$ 1.8 (men) and UBOS-PA $\leq$ 3.7 | 1              | 0.5%  |
| UBOS-EE $\geq$ 27 and UBOS-DP $\geq$ 10                                                           | 1              | 0.5%  |
| <b>Definition of Emotional Exhaustion</b>                                                         |                |       |
| Did Not Report Emotional Exhaustion Prevalence                                                    | 51             | 28.0% |
| aMBI-EE $\geq$ 13                                                                                 | 1              | 0.5%  |
| aMBI-EE $\geq$ 27                                                                                 | 3              | 1.6%  |
| CESQT-EE>Top Tertile                                                                              | 1              | 0.5%  |
| MBI-EE High                                                                                       | 22             | 12.1% |
| MBI-EE High Frequency Percentage                                                                  | 1              | 0.5%  |
| MBI-EE $\geq$ 15                                                                                  | 1              | 0.5%  |
| MBI-EE $\geq$ 22                                                                                  | 1              | 0.5%  |
| MBI-EE $\geq$ 24                                                                                  | 2              | 1.1%  |
| MBI-EE $\geq$ 25                                                                                  | 1              | 0.5%  |
| MBI-EE $\geq$ 26                                                                                  | 2              | 1.1%  |
| MBI-EE $\geq$ 27                                                                                  | 57             | 31.3% |
| MBI-EE $\geq$ 28                                                                                  | 8              | 4.4%  |
| MBI-EE $\geq$ 30                                                                                  | 4              | 2.2%  |
| MBI-EE $\geq$ 31                                                                                  | 1              | 0.5%  |
| MBI-EE $\geq$ 40                                                                                  | 1              | 0.5%  |
| MBI-EE>Top Quartile                                                                               | 3              | 1.6%  |
| MBI-EE>Top Tertile                                                                                | 1              | 0.5%  |
| MBI-EX High                                                                                       | 1              | 0.5%  |
| MBI-EX $\geq$ 17                                                                                  | 1              | 0.5%  |
| MBI-EX $\geq$ 3.2                                                                                 | 2              | 1.1%  |
| MBI-EX>2.5                                                                                        | 1              | 0.5%  |
| MBI-EX>Top Tertile                                                                                | 2              | 1.1%  |
| Mean MBI-EE $\geq$ 4                                                                              | 1              | 0.5%  |
| Mean MBI-EE>3                                                                                     | 1              | 0.5%  |
| Modified MBI-EE $\geq$ 18                                                                         | 2              | 1.1%  |

|                                             | No. of Studies | %     |
|---------------------------------------------|----------------|-------|
| Single-item Measure of MBI-EE $\geq$ 27     | 1              | 0.5%  |
| Single-item Measure of MBI-EE $\geq$ 4      | 5              | 2.7%  |
| UBOS-EE High                                | 2              | 1.1%  |
| UBOS-EE $\geq$ 2.38                         | 1              | 0.5%  |
| UBOS-EE $\geq$ 2.5                          | 1              | 0.5%  |
| <b>Definition of Depersonalization</b>      |                |       |
| Did Not Report Depersonalization Prevalence | 58             | 31.9% |
| aMBI-DP $\geq$ 10                           | 2              | 1.1%  |
| aMBI-DP $\geq$ 13                           | 2              | 1.1%  |
| CESQT-DP>Top Tertile                        | 1              | 0.5%  |
| MBI-CY High                                 | 1              | 0.5%  |
| MBI-CY $\geq$ 12                            | 1              | 0.5%  |
| MBI-CY>1.6                                  | 1              | 0.5%  |
| MBI-CY>2.2                                  | 1              | 0.5%  |
| MBI-CY>Top Tertile                          | 2              | 1.1%  |
| MBI-DP High                                 | 21             | 11.5% |
| MBI-DP High Frequency Percentage            | 1              | 0.5%  |
| MBI-DP $\geq$ 10                            | 41             | 22.5% |
| MBI-DP $\geq$ 11                            | 5              | 2.7%  |
| MBI-DP $\geq$ 12                            | 4              | 2.2%  |
| MBI-DP $\geq$ 13                            | 17             | 9.3%  |
| MBI-DP $\geq$ 14                            | 2              | 1.1%  |
| MBI-DP $\geq$ 15                            | 1              | 0.5%  |
| MBI-DP $\geq$ 6                             | 1              | 0.5%  |
| MBI-DP $\geq$ 9                             | 3              | 1.6%  |
| MBI-DP>Top Quartile                         | 3              | 1.6%  |
| MBI-DP>Top Tertile                          | 1              | 0.5%  |
| Mean MBI-DP $\geq$ 4                        | 1              | 0.5%  |
| Mean MBI-DP>3                               | 1              | 0.5%  |
| Modified MBI-DP $\geq$ 26                   | 2              | 1.1%  |

|                                                                         | No. of Studies | %     |
|-------------------------------------------------------------------------|----------------|-------|
| Single-item Measure of MBI-DP $\geq$ 10                                 | 1              | 0.5%  |
| Single-item Measure of MBI-DP $\geq$ 4                                  | 4              | 2.2%  |
| UBOS-DP High                                                            | 2              | 1.1%  |
| UBOS-DP $\geq$ 1.6 (women)/UBOS-DP $\geq$ 1.8 (men)                     | 2              | 1.1%  |
| <b>Definition of a Diminished Sense of Personal Accomplishment</b>      |                |       |
| Did Not Report a Diminished Sense of Personal Accomplishment Prevalence | 67             | 36.8% |
| 5-item Measure of MBI-PA $\leq$ 33                                      | 1              | 0.5%  |
| aMBI-PA $\leq$ 31                                                       | 1              | 0.5%  |
| aMBI-PA $\leq$ 33                                                       | 2              | 1.1%  |
| aMBI-PA $\leq$ 6                                                        | 1              | 0.5%  |
| CESQT-PA<Lowest Tertile                                                 | 1              | 0.5%  |
| MBI-PA High Frequency Percentage                                        | 1              | 0.5%  |
| MBI-PA Low                                                              | 20             | 11.0% |
| MBI-PA $\leq$ 29                                                        | 4              | 2.2%  |
| MBI-PA $\leq$ 30                                                        | 3              | 1.6%  |
| MBI-PA $\leq$ 31                                                        | 14             | 7.7%  |
| MBI-PA $\leq$ 32                                                        | 8              | 4.4%  |
| MBI-PA $\leq$ 33                                                        | 40             | 22.0% |
| MBI-PA $\leq$ 36                                                        | 1              | 0.5%  |
| MBI-PA $\leq$ 38                                                        | 1              | 0.5%  |
| MBI-PA $\leq$ 39                                                        | 1              | 0.5%  |
| MBI-PA<Lowest Quartile                                                  | 2              | 1.1%  |
| MBI-PA<Lowest Tertile                                                   | 1              | 0.5%  |
| MBI-PE Low                                                              | 1              | 0.5%  |
| MBI-PE $\leq$ 3.7                                                       | 1              | 0.5%  |
| MBI-PE $\leq$ 4.0                                                       | 1              | 0.5%  |
| MBI-PE $\leq$ 9                                                         | 1              | 0.5%  |
| MBI-PE<Lowest Tertile                                                   | 1              | 0.5%  |
| Mean MBI-PA $\leq$ 4                                                    | 1              | 0.5%  |
| Mean MBI-PA<3                                                           | 1              | 0.5%  |



|                           | <b>No. of Studies</b> | <b>%</b> |
|---------------------------|-----------------------|----------|
| Modified MBI-PA $\leq$ 22 | 2                     | 1.1%     |
| UBOS-PA Low               | 2                     | 1.1%     |
| UBOS-PA $\leq$ 3.7        | 2                     | 1.1%     |

**eTable 9.** Meta-analysis of the Prevalence of Emotional Exhaustion

| Study                                     | Prevalence (%) | LCI   | UCI   | %W(random) |
|-------------------------------------------|----------------|-------|-------|------------|
| Asai, 2007 <sup>20</sup>                  | 22.0%          | 18.9% | 25.2% | 0.9%       |
| Chen, 2013 <sup>25</sup>                  | 49.2%          | 44.8% | 53.5% | 0.9%       |
| Vandenbroeck, 2017 <sup>29</sup>          | 38.7%          | 35.9% | 41.5% | 0.9%       |
| Pedersen, 2013 <sup>33</sup>              | 9.6%           | 6.8%  | 13.0% | 0.8%       |
| Pedersen, 2016 <sup>34</sup>              | 18.1%          | 16.0% | 20.4% | 0.9%       |
| Pedersen, 2018 <sup>35</sup>              | 17.6%          | 14.6% | 20.9% | 0.8%       |
| Lesage, 2013 <sup>37</sup>                | 34.3%          | 31.9% | 36.8% | 0.9%       |
| Dreano-Hartz, 2015 <sup>38</sup>          | 8.7%           | 5.8%  | 12.5% | 0.8%       |
| Pantenburg, 2016 <sup>43</sup>            | 30.2%          | 28.0% | 32.4% | 0.9%       |
| O'Kelly, 2015 <sup>45</sup>               | 28.5%          | 24.9% | 32.4% | 0.9%       |
| Grassi, 2000 <sup>49</sup>                | 27.4%          | 22.7% | 32.6% | 0.8%       |
| Chivato-Perez, 2011 <sup>72</sup>         | 33.4%          | 28.8% | 38.3% | 0.8%       |
| Riquelme, 2018 <sup>77</sup>              | 22.6%          | 18.0% | 27.7% | 0.8%       |
| Escriba-Aguir, 2007 <sup>79</sup>         | 36.5%          | 31.5% | 41.8% | 0.8%       |
| Arigoni, 2009 <sup>80</sup>               | 33.3%          | 28.5% | 38.4% | 0.8%       |
| Goehring, 2005 <sup>81</sup>              | 19.0%          | 17.2% | 20.9% | 0.9%       |
| Upton, 2012 <sup>84</sup>                 | 32.9%          | 27.7% | 38.4% | 0.8%       |
| Taylor, 2005 <sup>86</sup>                | 41.0%          | 38.3% | 43.8% | 0.9%       |
| Al-Dubai, 2010 <sup>95</sup>              | 63.2%          | 59.1% | 67.2% | 0.9%       |
| Shanafelt, 2014 <sup>119</sup>            | 38.3%          | 35.4% | 41.3% | 0.9%       |
| Golub, 2008 <sup>120</sup>                | 23.1%          | 18.8% | 27.8% | 0.8%       |
| Shanafelt, 2012 <sup>123</sup>            | 37.9%          | 36.8% | 39.1% | 0.9%       |
| Shanafelt, 2015 <sup>124</sup>            | 46.9%          | 45.7% | 48.1% | 0.9%       |
| Shanafelt, 2009 <sup>125</sup>            | 30.2%          | 26.0% | 34.6% | 0.8%       |
| Busis, 2017 <sup>126</sup>                | 53.4%          | 50.9% | 55.9% | 0.9%       |
| Campbell, 2001 <sup>132</sup>             | 31.7%          | 27.9% | 35.7% | 0.9%       |
| Kamal, 2015 <sup>134</sup>                | 60.1%          | 56.3% | 63.7% | 0.9%       |
| Shanafelt, 2009 <sup>135</sup>            | 31.7%          | 30.7% | 32.8% | 0.9%       |
| Qureshi, 2014 <sup>136</sup>              | 24.9%          | 22.8% | 27.1% | 0.9%       |
| Yoon, 2010 <sup>148</sup>                 | 34.4%          | 31.6% | 37.3% | 0.9%       |
| Kluger, 2003 <sup>172</sup>               | 19.9%          | 16.2% | 24.0% | 0.8%       |
| Winefield, 1991 <sup>173</sup>            | 29.8%          | 26.9% | 32.9% | 0.9%       |
| Maticorena-Quevedo J, 2014 <sup>188</sup> | 14.2%          | 12.8% | 15.7% | 0.9%       |
| Margaryan, 2010 <sup>10</sup>             | 34.4%          | 26.2% | 43.3% | 0.8%       |
| Siu, 2012 <sup>14</sup>                   | 50.9%          | 44.2% | 57.6% | 0.8%       |
| Das, 2016 <sup>16</sup>                   | 0.0%           | 0.0%  | 60.2% | 0.1%       |
| Langade, 2016 <sup>17</sup>               | 45.0%          | 40.5% | 49.6% | 0.9%       |
| Zafar, 2016 <sup>21</sup>                 | 42.4%          | 34.8% | 50.4% | 0.8%       |
| Sadat-Ali, 2005 <sup>22</sup>             | 50.7%          | 38.4% | 63.0% | 0.7%       |
| Schooley, 2016 <sup>26</sup>              | 71.1%          | 54.1% | 84.6% | 0.6%       |
| Eelen, 2014 <sup>28</sup>                 | 38.6%          | 27.2% | 51.0% | 0.7%       |
| Selmanovic, 2011 <sup>30</sup>            | 37.4%          | 29.6% | 45.8% | 0.8%       |
| Stanetic, 2013 <sup>31</sup>              | 46.0%          | 39.6% | 52.6% | 0.8%       |
| Ozvacic Adzic Z, 2013 <sup>32</sup>       | 42.4%          | 33.6% | 51.6% | 0.8%       |
| Bohle, 2001 <sup>41</sup>                 | 37.3%          | 24.1% | 51.9% | 0.7%       |
| Richter, 2014 <sup>42</sup>               | 33.1%          | 27.5% | 39.0% | 0.8%       |

| <b>Study</b>                                  | <b>Prevalence (%)</b> | <b>LCI</b> | <b>UCI</b> | <b>%W(random)</b> |
|-----------------------------------------------|-----------------------|------------|------------|-------------------|
| Panagopoulou, 2006 <sup>44</sup>              | 16.5%                 | 9.9%       | 25.1%      | 0.7%              |
| Bressi, 2009 <sup>46</sup>                    | 49.4%                 | 38.1%      | 60.7%      | 0.7%              |
| Bressi, 2008 <sup>47</sup>                    | 32.2%                 | 24.0%      | 41.3%      | 0.8%              |
| Raggio, 2007 <sup>48</sup>                    | 36.0%                 | 18.0%      | 57.5%      | 0.5%              |
| Travado, 2005 <sup>52</sup>                   | 25.6%                 | 18.1%      | 34.4%      | 0.8%              |
| Pranckeviciene, 2016 <sup>53</sup>            | 25.8%                 | 11.9%      | 44.6%      | 0.5%              |
| Mikalauskas, 2018 <sup>54</sup>               | 34.1%                 | 27.9%      | 40.8%      | 0.8%              |
| Mikalauskas, 2012 <sup>55</sup>               | 18.6%                 | 9.7%       | 30.9%      | 0.6%              |
| van der Ploeg, 2003 <sup>57</sup>             | 25.0%                 | 16.2%      | 35.6%      | 0.7%              |
| Meynaar, 2015 <sup>58</sup>                   | 10.7%                 | 7.3%       | 15.0%      | 0.8%              |
| Glebocka, 2017 <sup>61</sup>                  | 33.3%                 | 20.4%      | 48.4%      | 0.6%              |
| Marcelino, 2012 <sup>63</sup>                 | 25.3%                 | 18.6%      | 33.1%      | 0.8%              |
| Hagau, 2012 <sup>65</sup>                     | 38.2%                 | 26.7%      | 50.8%      | 0.7%              |
| Stojanovic-Tasic, 2018 <sup>66</sup>          | 32.4%                 | 26.1%      | 39.2%      | 0.8%              |
| Vicentic, 2013 <sup>67</sup>                  | 58.3%                 | 49.0%      | 67.3%      | 0.8%              |
| Milenovic, 2016 <sup>68</sup>                 | 52.7%                 | 45.6%      | 59.7%      | 0.8%              |
| Putnik, 2011 <sup>69</sup>                    | 48.3%                 | 43.1%      | 53.5%      | 0.8%              |
| Yuguero Torres, 2015 <sup>70</sup>            | 29.6%                 | 21.2%      | 39.2%      | 0.8%              |
| Yuguero, 2017 <sup>71</sup>                   | 28.7%                 | 21.3%      | 37.1%      | 0.8%              |
| Frutos-Llanes, 2014 <sup>73</sup>             | 34.8%                 | 26.9%      | 43.2%      | 0.8%              |
| Martínez de la Casa Muñoz, 2003 <sup>74</sup> | 41.0%                 | 32.9%      | 49.5%      | 0.8%              |
| Vila Falgueras, 2014 <sup>75</sup>            | 42.7%                 | 36.9%      | 48.6%      | 0.8%              |
| Atalaya, 2008 <sup>76</sup>                   | 52.4%                 | 29.8%      | 74.3%      | 0.5%              |
| Orton, 2012 <sup>85</sup>                     | 46.3%                 | 42.1%      | 50.5%      | 0.9%              |
| Sharma, 2008 <sup>88</sup>                    | 31.7%                 | 27.6%      | 36.0%      | 0.8%              |
| Soltanifar, 2018 <sup>89</sup>                | 42.9%                 | 31.6%      | 54.7%      | 0.7%              |
| Ahmadpanah, 2015 <sup>90</sup>                | 15.0%                 | 8.7%       | 23.5%      | 0.7%              |
| Kushnir, 2014 <sup>91</sup>                   | 44.1%                 | 35.6%      | 52.9%      | 0.8%              |
| Al-Shoraian, 2011 <sup>92</sup>               | 40.0%                 | 33.2%      | 47.2%      | 0.8%              |
| Hamdan, 2017 <sup>93</sup>                    | 72.3%                 | 64.2%      | 79.5%      | 0.8%              |
| Amanullah, 2017 <sup>96</sup>                 | 38.2%                 | 25.4%      | 52.3%      | 0.7%              |
| Helewa, 2013 <sup>98</sup>                    | 33.3%                 | 13.3%      | 59.0%      | 0.5%              |
| Lee, 2008 <sup>99</sup>                       | 48.0%                 | 38.9%      | 57.2%      | 0.8%              |
| Lloyd, 1994 <sup>100</sup>                    | 13.1%                 | 9.3%       | 17.7%      | 0.8%              |
| Elit, 2004 <sup>101</sup>                     | 34.3%                 | 19.1%      | 52.2%      | 0.6%              |
| Viviers, 2008 <sup>102</sup>                  | 44.7%                 | 35.8%      | 53.9%      | 0.8%              |
| Dyrbye, 2009 <sup>103</sup>                   | 46.2%                 | 34.8%      | 57.8%      | 0.7%              |
| Johns, 2005 <sup>105</sup>                    | 26.2%                 | 18.2%      | 35.6%      | 0.7%              |
| Gabbe, 2002 <sup>106</sup>                    | 53.8%                 | 44.4%      | 63.0%      | 0.8%              |
| Cruz OA, 2007 <sup>107</sup>                  | 31.7%                 | 22.8%      | 41.7%      | 0.7%              |
| Garcia, 2015 <sup>109</sup>                   | 86.2%                 | 78.3%      | 92.1%      | 0.7%              |
| Shenoi, 2018 <sup>111</sup>                   | 34.4%                 | 28.6%      | 40.6%      | 0.8%              |
| Aggarwal, 2015 <sup>112</sup>                 | 27.7%                 | 15.6%      | 42.6%      | 0.6%              |
| Lu, 2015 <sup>113</sup>                       | 22.2%                 | 12.0%      | 35.6%      | 0.6%              |
| Rath, 2015 <sup>114</sup>                     | 30.1%                 | 25.4%      | 35.0%      | 0.8%              |
| Kroll, 2016 <sup>115</sup>                    | 60.4%                 | 53.4%      | 67.1%      | 0.8%              |
| Streu, 2014 <sup>52</sup>                     | 28.9%                 | 24.9%      | 33.0%      | 0.8%              |
| Jesse, 2015 <sup>117</sup>                    | 40.1%                 | 33.5%      | 46.9%      | 0.8%              |

| Study                               | Prevalence (%)   | LCI      | UCI            | %W(random) |
|-------------------------------------|------------------|----------|----------------|------------|
| Bertges Yost, 2005 <sup>118</sup>   | 37.3%            | 30.8%    | 44.3%          | 0.8%       |
| Fletcher, 2012 <sup>121</sup>       | 19.1%            | 12.4%    | 27.5%          | 0.7%       |
| Simons, 2016 <sup>122</sup>         | 33.3%            | 9.9%     | 65.1%          | 0.4%       |
| Klimo, 2013 <sup>127</sup>          | 14.1%            | 7.3%     | 23.8%          | 0.6%       |
| McPhillips, 2007 <sup>128</sup>     | 16.8%            | 11.0%    | 24.1%          | 0.7%       |
| Contag, 2010 <sup>129</sup>         | 26.7%            | 16.1%    | 39.7%          | 0.7%       |
| Guest, 2011 <sup>130</sup>          | 41.4%            | 29.8%    | 53.8%          | 0.7%       |
| Evans, 2015 <sup>131</sup>          | 52.8%            | 43.7%    | 61.7%          | 0.8%       |
| Saleh, 2007 <sup>133</sup>          | 41.5%            | 34.4%    | 48.8%          | 0.8%       |
| De Stefano, 2018 <sup>137</sup>     | 17.4%            | 5.0%     | 38.8%          | 0.4%       |
| Saleh, 2009 <sup>138</sup>          | 38.5%            | 29.1%    | 48.5%          | 0.8%       |
| Guntupalli, 1996 <sup>139</sup>     | 28.5%            | 23.0%    | 34.5%          | 0.8%       |
| West, 2013 <sup>140</sup>           | 27.0%            | 21.9%    | 32.5%          | 0.8%       |
| West, 2014 <sup>141</sup>           | 27.4%            | 23.2%    | 31.9%          | 0.8%       |
| Balch, 2011 <sup>142</sup>          | 22.9%            | 21.9%    | 23.9%          | 0.9%       |
| Gorelick, 2016 <sup>143</sup>       | 17.1%            | 14.7%    | 19.7%          | 0.9%       |
| Chew, 2017 <sup>149</sup>           | 61.7%            | 56.9%    | 66.5%          | 0.8%       |
| Deckard, 1992 <sup>150</sup>        | 43.5%            | 41.0%    | 46.1%          | 0.9%       |
| Deckard, 1994 <sup>151</sup>        | 56.2%            | 49.6%    | 62.6%          | 0.8%       |
| Dolan, 2014 <sup>158</sup>          | 44.7%            | 42.4%    | 47.1%          | 0.9%       |
| Stafford, 2010 <sup>169</sup>       | 35.7%            | 18.6%    | 55.9%          | 0.6%       |
| Ifediora, 2016 <sup>170</sup>       | 19.6%            | 13.9%    | 26.5%          | 0.8%       |
| Dunwoodie, 2007 <sup>171</sup>      | 22.5%            | 10.8%    | 38.5%          | 0.6%       |
| Pit, 2014 <sup>174</sup>            | 26.1%            | 17.5%    | 36.3%          | 0.7%       |
| Leung, 2015 <sup>175</sup>          | 28.2%            | 22.3%    | 34.6%          | 0.8%       |
| Surgenor, 2009 <sup>176</sup>       | 29.6%            | 24.2%    | 35.5%          | 0.8%       |
| Bruce, 2005 <sup>177</sup>          | 34.0%            | 21.2%    | 48.8%          | 0.7%       |
| Kumar, 2007 <sup>178</sup>          | 33.1%            | 27.1%    | 39.4%          | 0.8%       |
| Gil-Monte, 2008 <sup>179</sup>      | 47.2%            | 38.1%    | 56.4%          | 0.8%       |
| Barbosa, 2017 <sup>180</sup>        | 25.6%            | 13.5%    | 41.2%          | 0.6%       |
| Barbosa, 2012 <sup>181</sup>        | 41.8%            | 29.9%    | 54.5%          | 0.7%       |
| Garcia, 2014 <sup>182</sup>         | 44.3%            | 32.4%    | 56.7%          | 0.7%       |
| Barros, 2008 <sup>183</sup>         | 47.5%            | 41.7%    | 53.3%          | 0.8%       |
| Tironi, 2010 <sup>184</sup>         | 47.6%            | 41.8%    | 53.5%          | 0.8%       |
| Zanatta, 2015 <sup>185</sup>        | 25.0%            | 12.1%    | 42.2%          | 0.6%       |
| Govêia, 2018 <sup>186</sup>         | 24.4%            | 12.4%    | 40.3%          | 0.6%       |
| Aguirre Roldan, 2015 <sup>187</sup> | 45.3%            | 35.6%    | 55.3%          | 0.8%       |
|                                     |                  |          |                |            |
| Number of studies combined:         | k = 131          |          |                |            |
|                                     |                  |          |                |            |
| Random effects model                | 34.4%            | 32.3%    | 36.6%          |            |
|                                     |                  |          |                |            |
| Quantifying heterogeneity:          | $\tau^2 = 0.265$ | H = 5.56 | $I^2 = 96.8\%$ |            |
|                                     |                  |          |                |            |
| Test of heterogeneity:              |                  |          |                |            |
|                                     | Q                | d.f.     | p-value        |            |
|                                     | 4022             | 130      | <0.0001        |            |

**eTable 10.** Meta-analysis of the Prevalence of Emotional Exhaustion Stratified by Assessment Method

| Def. of Emotional Exhaustion            | k   | Prevalence (%) | LCI     | UCI   | Q    | $\tau^2$ | $I^2$ |
|-----------------------------------------|-----|----------------|---------|-------|------|----------|-------|
| aMBI-EE $\geq$ 13                       | 1   | 45.0%          | 40.6%   | 49.5% | 0    | --       | --    |
| aMBI-EE $\geq$ 27                       | 3   | 36.7%          | 21.8%   | 54.8% | 20   | 0.4      | 90.0% |
| CESQT-EE>Top Tertile                    | 1   | 45.3%          | 36.1%   | 54.8% | 0    | --       | --    |
| MBI-EE High                             | 22  | 37.7%          | 33.0%   | 42.7% | 188  | 0.2      | 88.8% |
| MBI-EE High Frequency Percentage        | 1   | 19.6%          | 14.3%   | 26.3% | 0    | --       | --    |
| MBI-EE $\geq$ 15                        | 1   | 37.4%          | 30.0%   | 45.5% | 0    | --       | --    |
| MBI-EE $\geq$ 22                        | 1   | 49.4%          | 38.7%   | 60.1% | 0    | --       | --    |
| MBI-EE $\geq$ 24                        | 2   | 32.9%          | 25.8%   | 40.9% | 0    | 0.0      | 0.0%  |
| MBI-EE $\geq$ 25                        | 1   | 33.4%          | 29.0%   | 38.2% | 0    | --       | --    |
| MBI-EE $\geq$ 26                        | 2   | 31.4%          | 24.9%   | 38.7% | 1    | 0.0      | 18.4% |
| MBI-EE $\geq$ 27                        | 57  | 34.8%          | 31.5%   | 38.2% | 2168 | 0.3      | 97.4% |
| MBI-EE $\geq$ 28                        | 8   | 30.6%          | 25.1%   | 36.8% | 84   | 0.1      | 91.7% |
| MBI-EE $\geq$ 30                        | 4   | 21.9%          | 9.4%    | 43.3% | 65   | 0.8      | 95.4% |
| MBI-EE $\geq$ 31                        | 1   | 46.0%          | 39.8%   | 52.4% | 0    | --       | --    |
| MBI-EE $\geq$ 40                        | 1   | 13.1%          | 9.5%    | 17.7% | 0    | --       | --    |
| MBI-EE>Top Quartile                     | 3   | 21.5%          | 17.9%   | 25.6% | 2    | 0.0      | 0.0%  |
| MBI-EE>Top Tertile                      | 1   | 27.4%          | 22.9%   | 32.5% | 0    | --       | --    |
| MBI-EX High                             | 1   | 38.2%          | 26.4%   | 51.6% | 0    | --       | --    |
| MBI-EX $\geq$ 17                        | 1   | 86.2%          | 78.4%   | 91.5% | 0    | --       | --    |
| MBI-EX $\geq$ 3.2                       | 2   | 41.5%          | 28.1%   | 56.4% | 33   | 0.2      | 96.9% |
| MBI-EX>2.5                              | 1   | 48.3%          | 43.2%   | 53.3% | 0    | --       | --    |
| MBI-EX>Top Tertile                      | 2   | 32.3%          | 27.6%   | 37.4% | 1    | 0.0      | 0.0%  |
| Mean MBI-EE $\geq$ 4                    | 1   | 15.0%          | 9.3%    | 23.4% | 0    | --       | --    |
| Mean MBI-EE>3                           | 1   | 29.8%          | 27.0%   | 32.8% | 0    | --       | --    |
| Modified MBI-EE $\geq$ 18               | 2   | 49.5%          | 37.3%   | 61.7% | 13   | 0.1      | 92.2% |
| Single-item Measure of MBI-EE $\geq$ 27 | 1   | 61.7%          | 57.0%   | 66.3% | 0    | --       | --    |
| Single-item Measure of MBI-EE $\geq$ 4  | 5   | 27.0%          | 18.0%   | 38.5% | 372  | 0.4      | 98.9% |
| UBOS-EE High                            | 2   | 31.4%          | 19.8%   | 46.0% | 3    | 0.1      | 69.1% |
| UBOS-EE $\geq$ 2.38                     | 1   | 10.7%          | 7.5%    | 14.9% | 0    | --       | --    |
| UBOS-EE $\geq$ 2.5                      | 1   | 38.7%          | 35.9%   | 41.5% | 0    | --       | --    |
|                                         |     |                |         |       |      |          |       |
| Test for subgroup differences:          |     |                |         |       |      |          |       |
|                                         | Q   | d.f.           | p-value |       |      |          |       |
| Between groups                          | 482 | 29             | <0.0001 |       |      |          |       |

**eTable 11. Meta-analysis of the Prevalence of Depersonalization**

| <b>Study</b>                              | <b>Prevalence (%)</b> | <b>LCI</b> | <b>UCI</b> | <b>%W(random)</b> |
|-------------------------------------------|-----------------------|------------|------------|-------------------|
| Asai, 2007 <sup>20</sup>                  | 11.1%                 | 8.8%       | 13.6%      | 0.9%              |
| Chen, 2013 <sup>25</sup>                  | 52.0%                 | 47.6%      | 56.3%      | 0.9%              |
| Vandenbroeck, 2017 <sup>29</sup>          | 27.1%                 | 24.6%      | 29.8%      | 0.9%              |
| Pedersen, 2013 <sup>33</sup>              | 17.7%                 | 13.9%      | 21.9%      | 0.9%              |
| Pedersen, 2016 <sup>34</sup>              | 14.7%                 | 12.7%      | 17.0%      | 0.9%              |
| Pedersen, 2018 <sup>35</sup>              | 13.9%                 | 11.2%      | 16.9%      | 0.9%              |
| Lesage, 2013 <sup>37</sup>                | 20.1%                 | 18.0%      | 22.2%      | 0.9%              |
| Dreano-Hartz, 2015 <sup>38</sup>          | 3.9%                  | 2.0%       | 6.7%       | 0.7%              |
| Pantenburg, 2016 <sup>43</sup>            | 47.7%                 | 45.4%      | 50.1%      | 0.9%              |
| O'Kelly, 2015 <sup>45</sup>               | 27.0%                 | 23.4%      | 30.8%      | 0.9%              |
| Grassi, 2000 <sup>49</sup>                | 25.6%                 | 21.0%      | 30.7%      | 0.9%              |
| Chivato-Perez, 2011 <sup>72</sup>         | 28.5%                 | 24.1%      | 33.1%      | 0.9%              |
| Riquelme, 2018 <sup>77</sup>              | 22.3%                 | 17.7%      | 27.4%      | 0.9%              |
| Arigoni, 2009 <sup>80</sup>               | 27.6%                 | 23.1%      | 32.4%      | 0.9%              |
| Goehring, 2005 <sup>81</sup>              | 21.9%                 | 20.0%      | 23.9%      | 0.9%              |
| Upton, 2012 <sup>84</sup>                 | 31.6%                 | 26.5%      | 37.1%      | 0.9%              |
| Al-Dubai, 2010 <sup>95</sup>              | 19.4%                 | 16.2%      | 22.9%      | 0.9%              |
| Shanafelt, 2014 <sup>119</sup>            | 24.9%                 | 22.3%      | 27.6%      | 0.9%              |
| Golub, 2008 <sup>120</sup>                | 18.0%                 | 14.1%      | 22.4%      | 0.9%              |
| Shanafelt, 2012 <sup>123</sup>            | 29.4%                 | 28.4%      | 30.5%      | 0.9%              |
| Shanafelt, 2015 <sup>124</sup>            | 34.7%                 | 33.5%      | 35.8%      | 0.9%              |
| Shanafelt, 2009 <sup>125</sup>            | 13.3%                 | 10.3%      | 16.8%      | 0.9%              |
| Busis, 2017 <sup>126</sup>                | 41.4%                 | 39.0%      | 43.9%      | 0.9%              |
| Campbell, 2001 <sup>132</sup>             | 13.3%                 | 10.6%      | 16.4%      | 0.9%              |
| Kamal, 2015 <sup>131</sup>                | 24.0%                 | 20.9%      | 27.4%      | 0.9%              |
| Shanafelt, 2009 <sup>135</sup>            | 26.0%                 | 25.1%      | 27.0%      | 0.9%              |
| Qureshi, 2014 <sup>136</sup>              | 20.1%                 | 18.1%      | 22.1%      | 0.9%              |
| Kluger, 2003 <sup>172</sup>               | 19.9%                 | 16.2%      | 24.0%      | 0.9%              |
| Winfield, 1991 <sup>173</sup>             | 8.5%                  | 6.8%       | 10.5%      | 0.9%              |
| Maticorena-Quevedo J, 2014 <sup>188</sup> | 16.8%                 | 15.3%      | 18.4%      | 0.9%              |
| Margaryan, 2010 <sup>10</sup>             | 51.2%                 | 42.2%      | 60.1%      | 0.9%              |
| Siu, 2012 <sup>14</sup>                   | 53.1%                 | 46.4%      | 59.8%      | 0.9%              |
| Das, 2016 <sup>16</sup>                   | 0.0%                  | 0.0%       | 60.2%      | 0.1%              |
| Langade, 2016 <sup>17</sup>               | 66.0%                 | 61.6%      | 70.2%      | 0.9%              |
| Zafar, 2016 <sup>21</sup>                 | 72.9%                 | 65.6%      | 79.5%      | 0.9%              |
| Sadat-Ali, 2005 <sup>22</sup>             | 59.4%                 | 46.9%      | 71.1%      | 0.8%              |
| Schooley, 2016 <sup>26</sup>              | 79.0%                 | 62.7%      | 90.5%      | 0.6%              |
| Eelen, 2014 <sup>28</sup>                 | 27.1%                 | 17.2%      | 39.1%      | 0.8%              |
| Selmanovic, 2011 <sup>30</sup>            | 45.6%                 | 37.4%      | 54.0%      | 0.9%              |
| Stanetic, 2013 <sup>31</sup>              | 21.3%                 | 16.3%      | 27.1%      | 0.9%              |
| Ozvacic Adzic Z, 2013 <sup>32</sup>       | 16.0%                 | 10.1%      | 23.6%      | 0.8%              |
| Bohle, 2001 <sup>41</sup>                 | 27.5%                 | 15.9%      | 41.7%      | 0.7%              |
| Panagopoulou, 2006 <sup>44</sup>          | 8.7%                  | 4.1%       | 15.9%      | 0.7%              |
| Bressi, 2009 <sup>46</sup>                | 39.5%                 | 28.8%      | 51.0%      | 0.8%              |
| Bressi, 2008 <sup>47</sup>                | 29.8%                 | 21.8%      | 38.7%      | 0.8%              |
| Raggio, 2007 <sup>48</sup>                | 56.0%                 | 34.9%      | 75.6%      | 0.6%              |

| <b>Study</b>                                  | <b>Prevalence (%)</b> | <b>LCI</b> | <b>UCI</b> | <b>%W(random)</b> |
|-----------------------------------------------|-----------------------|------------|------------|-------------------|
| Travado, 2005 <sup>52</sup>                   | 22.3%                 | 15.3%      | 30.8%      | 0.8%              |
| Pranckeviciene, 2016 <sup>53</sup>            | 16.1%                 | 5.5%       | 33.7%      | 0.6%              |
| Mikalauskas, 2018 <sup>54</sup>               | 25.9%                 | 20.3%      | 32.2%      | 0.9%              |
| Mikalauskas, 2012 <sup>55</sup>               | 25.4%                 | 15.0%      | 38.4%      | 0.7%              |
| van der Ploeg, 2003 <sup>57</sup>             | 40.5%                 | 29.9%      | 51.8%      | 0.8%              |
| Meynaar, 2015 <sup>58</sup>                   | 7.7%                  | 4.8%       | 11.6%      | 0.8%              |
| Glebocka, 2017 <sup>61</sup>                  | 35.4%                 | 22.2%      | 50.5%      | 0.7%              |
| Marcelino, 2012 <sup>63</sup>                 | 16.0%                 | 10.5%      | 22.9%      | 0.8%              |
| Hagau, 2012 <sup>65</sup>                     | 42.7%                 | 30.7%      | 55.2%      | 0.8%              |
| Stojanovic-Tasic, 2018 <sup>66</sup>          | 14.9%                 | 10.4%      | 20.5%      | 0.8%              |
| Vicentic, 2013 <sup>67</sup>                  | 0.0%                  | 0.0%       | 3.0%       | 0.1%              |
| Milenovic, 2016 <sup>68</sup>                 | 12.2%                 | 8.1%       | 17.5%      | 0.8%              |
| Putnik, 2011 <sup>69</sup>                    | 12.9%                 | 9.6%       | 16.7%      | 0.9%              |
| Yuguero Torres, 2015 <sup>70</sup>            | 19.4%                 | 12.5%      | 28.2%      | 0.8%              |
| Yuguero, 2017 <sup>71</sup>                   | 18.4%                 | 12.3%      | 25.9%      | 0.8%              |
| Frutos-Llanes, 2014 <sup>73</sup>             | 43.3%                 | 35.0%      | 51.9%      | 0.9%              |
| Martínez de la Casa Muñoz, 2003 <sup>74</sup> | 52.8%                 | 44.3%      | 61.2%      | 0.9%              |
| Vila Falgueras, 2014 <sup>75</sup>            | 27.3%                 | 22.3%      | 32.8%      | 0.9%              |
| Atalaya, 2008 <sup>76</sup>                   | 33.3%                 | 14.6%      | 57.0%      | 0.6%              |
| Orton, 2012 <sup>85</sup>                     | 42.0%                 | 37.9%      | 46.2%      | 0.9%              |
| Sharma, 2008 <sup>88</sup>                    | 21.2%                 | 17.6%      | 25.1%      | 0.9%              |
| Soltanifar, 2018 <sup>89</sup>                | 11.7%                 | 5.5%       | 21.0%      | 0.7%              |
| Ahmadpanah, 2015 <sup>90</sup>                | 15.0%                 | 8.7%       | 23.5%      | 0.8%              |
| Kushnir, 2014 <sup>91</sup>                   | 36.0%                 | 28.0%      | 44.7%      | 0.9%              |
| Al-Shoraian, 2011 <sup>92</sup>               | 45.5%                 | 38.5%      | 52.7%      | 0.9%              |
| Hamdan, 2017 <sup>93</sup>                    | 32.1%                 | 24.5%      | 40.6%      | 0.9%              |
| Amanullah, 2017 <sup>96</sup>                 | 49.1%                 | 35.4%      | 62.9%      | 0.8%              |
| Helewa, 2013 <sup>98</sup>                    | 38.9%                 | 17.3%      | 64.3%      | 0.6%              |
| Lee, 2008 <sup>99</sup>                       | 46.3%                 | 37.3%      | 55.6%      | 0.9%              |
| Lloyd, 1994 <sup>100</sup>                    | 60.8%                 | 54.7%      | 66.7%      | 0.9%              |
| Elit, 2004 <sup>101</sup>                     | 14.3%                 | 4.8%       | 30.3%      | 0.6%              |
| Viviers, 2008 <sup>102</sup>                  | 40.7%                 | 31.9%      | 49.9%      | 0.9%              |
| Dyrbye, 2009 <sup>103</sup>                   | 41.3%                 | 30.1%      | 53.3%      | 0.8%              |
| Johns, 2005 <sup>105</sup>                    | 13.1%                 | 7.3%       | 21.0%      | 0.8%              |
| Gabbe, 2002 <sup>106</sup>                    | 36.1%                 | 27.5%      | 45.5%      | 0.8%              |
| Cruz OA, 2007 <sup>107</sup>                  | 13.9%                 | 7.8%       | 22.2%      | 0.8%              |
| Garcia, 2015 <sup>109</sup>                   | 89.9%                 | 82.7%      | 94.9%      | 0.7%              |
| Shenoi, 2018 <sup>111</sup>                   | 19.8%                 | 15.1%      | 25.3%      | 0.9%              |
| Aggarwal, 2015 <sup>112</sup>                 | 14.9%                 | 6.2%       | 28.3%      | 0.6%              |
| Lu, 2015 <sup>113</sup>                       | 38.9%                 | 25.9%      | 53.1%      | 0.8%              |
| Rath, 2015 <sup>114</sup>                     | 10.0%                 | 7.2%       | 13.6%      | 0.9%              |
| Kroll, 2016 <sup>115</sup>                    | 35.8%                 | 29.2%      | 42.7%      | 0.9%              |
| Streu, 2014 <sup>116</sup>                    | 16.2%                 | 13.1%      | 19.7%      | 0.9%              |
| Jesse, 2015 <sup>117</sup>                    | 17.1%                 | 12.3%      | 22.7%      | 0.9%              |
| Bertges Yost, 2005 <sup>118</sup>             | 26.3%                 | 20.5%      | 32.8%      | 0.9%              |
| Fletcher, 2012 <sup>121</sup>                 | 20.9%                 | 13.9%      | 29.4%      | 0.8%              |
| Simons, 2016 <sup>122</sup>                   | 25.0%                 | 5.5%       | 57.2%      | 0.4%              |
| Klimo, 2013 <sup>127</sup>                    | 27.2%                 | 17.9%      | 38.2%      | 0.8%              |

| <b>Study</b>                        | <b>Prevalence (%)</b> | <b>LCI</b> | <b>UCI</b>     | <b>%W(random)</b> |
|-------------------------------------|-----------------------|------------|----------------|-------------------|
| McPhillips, 2007 <sup>128</sup>     | 13.1%                 | 8.0%       | 20.0%          | 0.8%              |
| Contag, 2010 <sup>129</sup>         | 21.7%                 | 12.1%      | 34.2%          | 0.7%              |
| Guest, 2011 <sup>130</sup>          | 11.3%                 | 5.0%       | 21.0%          | 0.7%              |
| Evans, 2015 <sup>131</sup>          | 21.3%                 | 14.5%      | 29.4%          | 0.8%              |
| Saleh, 2007 <sup>133</sup>          | 26.9%                 | 20.8%      | 33.8%          | 0.9%              |
| De Stefano, 2018 <sup>137</sup>     | 26.1%                 | 10.2%      | 48.4%          | 0.6%              |
| Guntupalli, 1996 <sup>139</sup>     | 20.6%                 | 15.8%      | 26.1%          | 0.9%              |
| West, 2013 <sup>140</sup>           | 10.3%                 | 7.0%       | 14.4%          | 0.8%              |
| West, 2014 <sup>141</sup>           | 11.1%                 | 8.3%       | 14.5%          | 0.9%              |
| Balch, 2011 <sup>142</sup>          | 14.9%                 | 14.1%      | 15.8%          | 0.9%              |
| Gorelick, 2016 <sup>143</sup>       | 12.5%                 | 10.4%      | 14.9%          | 0.9%              |
| Chew, 2017 <sup>149</sup>           | 53.3%                 | 48.3%      | 58.2%          | 0.9%              |
| Deckard, 1992 <sup>150</sup>        | 40.3%                 | 37.8%      | 42.8%          | 0.9%              |
| Deckard, 1994 <sup>151</sup>        | 60.0%                 | 51.2%      | 68.3%          | 0.9%              |
| Stafford, 2010 <sup>169</sup>       | 10.7%                 | 2.3%       | 28.2%          | 0.5%              |
| Ifediora, 2016 <sup>170</sup>       | 6.0%                  | 2.9%       | 10.7%          | 0.7%              |
| Dunwoodie, 2007 <sup>171</sup>      | 7.5%                  | 1.6%       | 20.4%          | 0.5%              |
| Leung, 2015 <sup>175</sup>          | 19.1%                 | 14.1%      | 24.9%          | 0.9%              |
| Surgenor, 2009 <sup>176</sup>       | 24.3%                 | 19.3%      | 30.0%          | 0.9%              |
| Bruce, 2005 <sup>177</sup>          | 28.0%                 | 16.2%      | 42.5%          | 0.7%              |
| Kumar, 2007 <sup>178</sup>          | 13.0%                 | 9.0%       | 17.9%          | 0.8%              |
| Gil-Monte, 2008 <sup>179</sup>      | 22.8%                 | 15.7%      | 31.2%          | 0.8%              |
| Barbosa, 2017 <sup>180</sup>        | 44.2%                 | 29.1%      | 60.1%          | 0.7%              |
| Barbosa, 2012 <sup>181</sup>        | 37.3%                 | 25.8%      | 50.0%          | 0.8%              |
| Garcia, 2014 <sup>182</sup>         | 24.3%                 | 14.8%      | 36.0%          | 0.8%              |
| Barros, 2008 <sup>183</sup>         | 24.6%                 | 19.8%      | 29.9%          | 0.9%              |
| Tironi, 2010 <sup>184</sup>         | 24.7%                 | 19.9%      | 30.0%          | 0.9%              |
| Zanatta, 2015 <sup>185</sup>        | 25.0%                 | 12.1%      | 42.2%          | 0.7%              |
| Govêia, 2018 <sup>186</sup>         | 29.3%                 | 16.1%      | 45.5%          | 0.7%              |
| Aguirre Roldan, 2015 <sup>187</sup> | 18.9%                 | 11.9%      | 27.6%          | 0.8%              |
|                                     |                       |            |                |                   |
| Number of studies combined:         | k = 124               |            |                |                   |
|                                     |                       |            |                |                   |
| Random effects model                | 25.8%                 | 23.7%      | 28.0%          |                   |
|                                     |                       |            |                |                   |
| Quantifying heterogeneity:          | $\tau^2 = 0.36$       | H = 5.86   | $I^2 = 97.1\%$ |                   |
|                                     |                       |            |                |                   |
| Test of heterogeneity:              |                       |            |                |                   |
|                                     | Q                     | d.f.       | p-value        |                   |
|                                     | 4224                  | 123        | <0.0001        |                   |



**eTable 12.** Meta-analysis of the Prevalence of Depersonalization Stratified by Assessment Method

| Definition of Depersonalization           | k   | Prevalence (%) | LCI     | UCI   | Q    | $\tau^2$ | $I^2$ |
|-------------------------------------------|-----|----------------|---------|-------|------|----------|-------|
| aMBI-DP $\geq$ 10                         | 2   | 22.9%          | 7.5%    | 52.1% | 15   | 0.8      | 93.2% |
| aMBI-DP $\geq$ 13                         | 2   | 36.2%          | 4.7%    | 86.7% | 67   | 3.1      | 98.5% |
| CESQT-DP>Top Tertile                      | 1   | 18.9%          | 12.5%   | 27.5% | 0    | --       | --    |
| MBI-CY High                               | 1   | 49.1%          | 36.2%   | 62.1% | 0    | --       | --    |
| MBI-CY $\geq$ 12                          | 1   | 89.9%          | 82.7%   | 94.3% | 0    | --       | --    |
| MBI-CY>1.6                                | 1   | 12.9%          | 9.8%    | 16.7% | 0    | --       | --    |
| MBI-CY>2.2                                | 1   | 52.0%          | 47.7%   | 56.2% | 0    | --       | --    |
| MBI-CY>Top Tertile                        | 2   | 25.3%          | 13.0%   | 43.6% | 3    | 0.3      | 67.1% |
| MBI-DP High                               | 21  | 25.2%          | 20.2%   | 31.0% | 262  | 0.4      | 92.4% |
| MBI-DP High Frequency Percentage          | 1   | 6.0%           | 3.2%    | 10.7% | 0    | --       | --    |
| MBI-DP $\geq$ 10                          | 41  | 26.0%          | 22.9%   | 29.4% | 1352 | 0.3      | 97.0% |
| MBI-DP $\geq$ 11                          | 5   | 27.7%          | 21.5%   | 34.8% | 68   | 0.1      | 94.1% |
| MBI-DP $\geq$ 12                          | 4   | 20.5%          | 3.6%    | 64.2% | 187  | 3.5      | 98.4% |
| MBI-DP $\geq$ 13                          | 17  | 22.1%          | 18.3%   | 26.5% | 174  | 0.2      | 90.8% |
| MBI-DP $\geq$ 14                          | 2   | 36.4%          | 22.2%   | 53.5% | 2    | 0.1      | 48.6% |
| MBI-DP $\geq$ 15                          | 1   | 60.8%          | 54.9%   | 66.5% | 0    | --       | --    |
| MBI-DP $\geq$ 6                           | 1   | 39.5%          | 29.5%   | 50.5% | 0    | --       | --    |
| MBI-DP $\geq$ 9                           | 3   | 36.3%          | 23.4%   | 51.5% | 6    | 0.2      | 68.6% |
| MBI-DP>Top Quartile                       | 3   | 17.6%          | 9.7%    | 29.9% | 9    | 0.3      | 77.9% |
| MBI-DP>Top Tertile                        | 1   | 25.6%          | 21.2%   | 30.6% | 0    | --       | --    |
| Mean MBI-DP $\geq$ 4                      | 1   | 15.0%          | 9.3%    | 23.4% | 0    | --       | --    |
| Mean MBI-DP>3                             | 1   | 8.5%           | 6.9%    | 10.5% | 0    | --       | --    |
| Modified MBI-DP $\geq$ 26                 | 2   | 49.7%          | 31.2%   | 68.4% | 19   | 0.3      | 94.7% |
| Single-item Measure of MBI-DP $\geq$ 10   | 1   | 53.3%          | 48.5%   | 58.1% | 0    | --       | --    |
| Single-item Measure of MBI-DP $\geq$ 4    | 4   | 12.6%          | 10.5%   | 15.0% | 12   | 0.0      | 74.1% |
| UBOS-DP High                              | 2   | 33.9%          | 22.2%   | 48.0% | 3    | 0.1      | 66.4% |
| DP $\geq$ 1.6 (women)/DP $\geq$ 1.8 (men) | 2   | 15.2%          | 4.0%    | 43.6% | 40   | 1.1      | 97.5% |
|                                           |     |                |         |       |      |          |       |
| Test for subgroup differences:            |     |                |         |       |      |          |       |
|                                           | Q   | d.f.           | p-value |       |      |          |       |
| Between groups                            | 832 | 26             | <0.0001 |       |      |          |       |

**eTable 13.** Meta-analysis of the Prevalence of a Diminished Sense of Personal Accomplishment

| <b>Study</b>                              | <b>Prevalence (%)</b> | <b>LCI</b> | <b>UCI</b> | <b>%W(random)</b> |
|-------------------------------------------|-----------------------|------------|------------|-------------------|
| Asai, 2007 <sup>20</sup>                  | 62.0%                 | 58.3%      | 65.6%      | 0.9%              |
| Chen, 2013 <sup>25</sup>                  | 73.3%                 | 69.3%      | 77.0%      | 0.9%              |
| Vandenbroeck, 2017 <sup>29</sup>          | 15.1%                 | 13.1%      | 17.2%      | 0.9%              |
| Pedersen, 2013 <sup>33</sup>              | 37.7%                 | 32.7%      | 43.0%      | 0.9%              |
| Pedersen, 2016 <sup>34</sup>              | 29.0%                 | 26.4%      | 31.7%      | 0.9%              |
| Pedersen, 2018 <sup>35</sup>              | 34.8%                 | 30.9%      | 38.8%      | 0.9%              |
| Lesage, 2013 <sup>37</sup>                | 63.9%                 | 61.4%      | 66.4%      | 0.9%              |
| Dreano-Hartz, 2015 <sup>38</sup>          | 23.0%                 | 18.4%      | 28.1%      | 0.9%              |
| Pantenburg, 2016 <sup>43</sup>            | 35.9%                 | 33.7%      | 38.2%      | 1.0%              |
| O'Kelly, 2016 <sup>45</sup>               | 31.3%                 | 27.5%      | 35.3%      | 0.9%              |
| Grassi, 2000 <sup>49</sup>                | 13.1%                 | 9.7%       | 17.3%      | 0.9%              |
| Chivato-Perez, 2011 <sup>72</sup>         | 9.7%                  | 7.0%       | 13.0%      | 0.9%              |
| Riquelme, 2018 <sup>77</sup>              | 24.9%                 | 20.1%      | 30.2%      | 0.9%              |
| Arigoni, 2009 <sup>80</sup>               | 19.6%                 | 15.6%      | 24.0%      | 0.9%              |
| Goehring, 2005 <sup>81</sup>              | 16.3%                 | 14.6%      | 18.1%      | 0.9%              |
| Al-Dubai, 2010 <sup>95</sup>              | 33.0%                 | 29.2%      | 37.1%      | 0.9%              |
| Shanafelt, 2014 <sup>119</sup>            | 13.2%                 | 11.2%      | 15.4%      | 0.9%              |
| Golub, 2008 <sup>120</sup>                | 11.1%                 | 8.0%       | 14.9%      | 0.9%              |
| Shanafelt, 2012 <sup>123</sup>            | 12.4%                 | 11.7%      | 13.2%      | 1.0%              |
| Shanafelt, 2015 <sup>124</sup>            | 16.3%                 | 15.5%      | 17.2%      | 1.0%              |
| Shanafelt, 2009 <sup>125</sup>            | 13.2%                 | 10.2%      | 16.6%      | 0.9%              |
| Busis, 2017 <sup>126</sup>                | 21.2%                 | 19.2%      | 23.3%      | 0.9%              |
| Campbell, 2001 <sup>132</sup>             | 4.4%                  | 2.8%       | 6.5%       | 0.9%              |
| Shanafelt, 2009 <sup>135</sup>            | 12.8%                 | 12.0%      | 13.5%      | 1.0%              |
| Qureshi, 2014 <sup>136</sup>              | 8.3%                  | 7.0%       | 9.8%       | 0.9%              |
| Kluger, 2003 <sup>172</sup>               | 37.0%                 | 32.4%      | 41.8%      | 0.9%              |
| Winefield, 1991 <sup>173</sup>            | 7.4%                  | 5.8%       | 9.3%       | 0.9%              |
| Maticorena-Quevedo J, 2014 <sup>188</sup> | 18.1%                 | 16.5%      | 19.8%      | 0.9%              |
| Margaryan, 2010 <sup>10</sup>             | 50.0%                 | 41.1%      | 58.9%      | 0.9%              |
| Siu, 2012 <sup>14</sup>                   | 55.3%                 | 48.6%      | 61.9%      | 0.9%              |
| Das, 2016 <sup>16</sup>                   | 50.0%                 | 6.8%       | 93.2%      | 0.4%              |
| Langade, 2016 <sup>17</sup>               | 87.1%                 | 83.8%      | 90.0%      | 0.9%              |
| Sadat-Ali, 2005 <sup>22</sup>             | 17.4%                 | 9.3%       | 28.4%      | 0.8%              |
| Schooley, 2016 <sup>26</sup>              | 29.0%                 | 15.4%      | 45.9%      | 0.8%              |
| Eelen, 2014 <sup>28</sup>                 | 7.1%                  | 2.4%       | 15.9%      | 0.7%              |
| Selmanovic, 2011 <sup>30</sup>            | 50.3%                 | 42.0%      | 58.7%      | 0.9%              |
| Stanetic, 2013 <sup>31</sup>              | 43.1%                 | 36.7%      | 49.6%      | 0.9%              |
| Ozvacic Adzic Z, 2013 <sup>32</sup>       | 60.0%                 | 50.9%      | 68.7%      | 0.9%              |
| Bohle, 2001 <sup>41</sup>                 | 9.8%                  | 3.3%       | 21.4%      | 0.7%              |
| Bressi, 2009 <sup>46</sup>                | 22.2%                 | 13.7%      | 32.8%      | 0.9%              |
| Bressi, 2008 <sup>47</sup>                | 12.4%                 | 7.1%       | 19.6%      | 0.9%              |
| Raggio, 2007 <sup>48</sup>                | 20.0%                 | 6.8%       | 40.7%      | 0.7%              |
| Travado, 2005 <sup>52</sup>               | 21.5%                 | 14.5%      | 29.9%      | 0.9%              |
| Pranckeviciene, 2016 <sup>53</sup>        | 25.8%                 | 11.9%      | 44.6%      | 0.8%              |
| Mikalauskas, 2018 <sup>54</sup>           | 38.6%                 | 32.2%      | 45.4%      | 0.9%              |

| <b>Study</b>                                  | <b>Prevalence (%)</b> | <b>LCI</b> | <b>UCI</b> | <b>%W(random)</b> |
|-----------------------------------------------|-----------------------|------------|------------|-------------------|
| Mikalauskas, 2012 <sup>55</sup>               | 42.4%                 | 29.6%      | 55.9%      | 0.9%              |
| van der Ploeg, 2003 <sup>57</sup>             | 20.2%                 | 12.3%      | 30.4%      | 0.9%              |
| Meyenaar, 2015 <sup>58</sup>                  | 13.2%                 | 9.4%       | 17.9%      | 0.9%              |
| Marcelino, 2012 <sup>63</sup>                 | 16.7%                 | 11.1%      | 23.6%      | 0.9%              |
| Hagau, 2012 <sup>65</sup>                     | 47.1%                 | 34.8%      | 59.6%      | 0.9%              |
| Stojanovic-Tasic, 2018 <sup>66</sup>          | 16.7%                 | 11.9%      | 22.4%      | 0.9%              |
| Vicentic, 2013 <sup>67</sup>                  | 0.0%                  | 0.0%       | 3.0%       | 0.3%              |
| Milenovic, 2016 <sup>68</sup>                 | 28.8%                 | 22.7%      | 35.5%      | 0.9%              |
| Putnik, 2011 <sup>69</sup>                    | 5.1%                  | 3.1%       | 7.8%       | 0.9%              |
| Yuguero Torres, 2015 <sup>70</sup>            | 11.1%                 | 5.9%       | 18.6%      | 0.9%              |
| Yuguero, 2017 <sup>71</sup>                   | 11.0%                 | 6.3%       | 17.5%      | 0.9%              |
| Frutos-Llanes, 2014 <sup>73</sup>             | 41.8%                 | 33.6%      | 50.4%      | 0.9%              |
| Martínez de la Casa Muñoz, 2003 <sup>74</sup> | 42.4%                 | 34.2%      | 50.9%      | 0.9%              |
| Vila Falgueras, 2014 <sup>75</sup>            | 7.9%                  | 5.0%       | 11.6%      | 0.9%              |
| Atalaya, 2008 <sup>76</sup>                   | 14.3%                 | 3.1%       | 36.3%      | 0.6%              |
| Orton, 2012 <sup>85</sup>                     | 33.7%                 | 29.8%      | 37.8%      | 0.9%              |
| Sharma, 2008 <sup>88</sup>                    | 28.8%                 | 24.8%      | 33.1%      | 0.9%              |
| Soltanifar, 2018 <sup>89</sup>                | 55.8%                 | 44.1%      | 67.2%      | 0.9%              |
| Ahmadpanah, 2015 <sup>90</sup>                | 10.0%                 | 4.9%       | 17.6%      | 0.8%              |
| Kushnir, 2014 <sup>91</sup>                   | 31.6%                 | 23.9%      | 40.1%      | 0.9%              |
| Al-Shoraian, 2011 <sup>92</sup>               | 46.5%                 | 39.4%      | 53.7%      | 0.9%              |
| Hamdan, 2017 <sup>93</sup>                    | 32.1%                 | 24.5%      | 40.6%      | 0.9%              |
| Amanullah, 2017 <sup>96</sup>                 | 23.6%                 | 13.2%      | 37.0%      | 0.8%              |
| Helewa, 2013 <sup>98</sup>                    | 27.8%                 | 9.7%       | 53.5%      | 0.7%              |
| Lee, 2008 <sup>99</sup>                       | 17.1%                 | 10.9%      | 24.9%      | 0.9%              |
| Lloyd, 1994 <sup>100</sup>                    | 44.0%                 | 38.0%      | 50.2%      | 0.9%              |
| Elit, 2004 <sup>101</sup>                     | 31.4%                 | 16.9%      | 49.3%      | 0.8%              |
| Viviers, 2008 <sup>102</sup>                  | 25.0%                 | 17.7%      | 33.6%      | 0.9%              |
| Dyrbye, 2009 <sup>103</sup>                   | 4.1%                  | 0.8%       | 11.4%      | 0.7%              |
| Johns, 2005 <sup>105</sup>                    | 46.7%                 | 37.0%      | 56.6%      | 0.9%              |
| Gabbe, 2002 <sup>106</sup>                    | 20.2%                 | 13.4%      | 28.5%      | 0.9%              |
| Cruz OA, 2007 <sup>107</sup>                  | 63.4%                 | 53.2%      | 72.7%      | 0.9%              |
| Garcia, 2015 <sup>109</sup>                   | 5.5%                  | 2.1%       | 11.6%      | 0.8%              |
| Shenoi, 2018 <sup>111</sup>                   | 21.4%                 | 16.5%      | 27.0%      | 0.9%              |
| Aggarwal, 2015 <sup>112</sup>                 | 31.9%                 | 19.1%      | 47.1%      | 0.8%              |
| Lu, 2015 <sup>113</sup>                       | 11.1%                 | 4.2%       | 22.6%      | 0.8%              |
| Rath, 2015 <sup>114</sup>                     | 11.1%                 | 8.1%       | 14.8%      | 0.9%              |
| Kroll, 2016 <sup>115</sup>                    | 19.3%                 | 14.2%      | 25.4%      | 0.9%              |
| Streu, 2014 <sup>116</sup>                    | 4.9%                  | 3.2%       | 7.2%       | 0.9%              |
| Jesse, 2015 <sup>117</sup>                    | 46.5%                 | 39.8%      | 53.4%      | 0.9%              |
| Bertges Yost, 2005 <sup>118</sup>             | 14.4%                 | 9.9%       | 19.9%      | 0.9%              |
| Fletcher, 2012 <sup>121</sup>                 | 10.4%                 | 5.5%       | 17.5%      | 0.9%              |
| Simons, 2016 <sup>122</sup>                   | 33.3%                 | 9.9%       | 65.1%      | 0.6%              |
| Klimo, 2013 <sup>127</sup>                    | 27.2%                 | 17.9%      | 38.2%      | 0.9%              |
| McPhillips, 2007 <sup>128</sup>               | 32.1%                 | 24.4%      | 40.6%      | 0.9%              |
| Contag, 2010 <sup>129</sup>                   | 10.0%                 | 3.8%       | 20.5%      | 0.8%              |
| Guest, 2011 <sup>130</sup>                    | 11.3%                 | 5.0%       | 21.0%      | 0.8%              |
| Evans, 2015 <sup>131</sup>                    | 11.8%                 | 6.8%       | 18.7%      | 0.9%              |

| <b>Study</b>                        | <b>Prevalence (%)</b> | <b>LCI</b> | <b>UCI</b>     | <b>%W(random)</b> |
|-------------------------------------|-----------------------|------------|----------------|-------------------|
| Saleh, 2007 <sup>133</sup>          | 2.6%                  | 0.9%       | 5.9%           | 0.8%              |
| De Stefano, 2018 <sup>137</sup>     | 56.5%                 | 34.5%      | 76.8%          | 0.8%              |
| Guntupalli, 1996 <sup>139</sup>     | 58.9%                 | 52.6%      | 65.0%          | 0.9%              |
| Chew, 2017 <sup>149</sup>           | 39.6%                 | 34.8%      | 44.5%          | 0.9%              |
| Deckard, 1992 <sup>150</sup>        | 8.2%                  | 6.9%       | 9.7%           | 0.9%              |
| Deckard, 1994 <sup>151</sup>        | 7.2%                  | 4.3%       | 11.3%          | 0.9%              |
| Stafford, 2010 <sup>169</sup>       | 3.7%                  | 0.1%       | 19.0%          | 0.4%              |
| Ifediora, 2016 <sup>170</sup>       | 4.2%                  | 1.7%       | 8.4%           | 0.8%              |
| Dunwoodie, 2007 <sup>171</sup>      | 2.5%                  | 0.1%       | 13.2%          | 0.4%              |
| Leung, 2015 <sup>175</sup>          | 24.1%                 | 18.6%      | 30.3%          | 0.9%              |
| Surgenor, 2009 <sup>176</sup>       | 32.2%                 | 26.6%      | 38.2%          | 0.9%              |
| Bruce, 2005 <sup>177</sup>          | 38.0%                 | 24.7%      | 52.8%          | 0.9%              |
| Kumar, 2007 <sup>178</sup>          | 23.9%                 | 18.6%      | 29.8%          | 0.9%              |
| Gil-Monte, 2008 <sup>179</sup>      | 34.2%                 | 25.8%      | 43.2%          | 0.9%              |
| Barbosa, 2017 <sup>180</sup>        | 51.2%                 | 35.5%      | 66.7%          | 0.9%              |
| Barbosa, 2012 <sup>181</sup>        | 58.2%                 | 45.5%      | 70.2%          | 0.9%              |
| Garcia, 2014 <sup>182</sup>         | 17.1%                 | 9.2%       | 28.0%          | 0.8%              |
| Barros, 2008 <sup>183</sup>         | 28.3%                 | 23.2%      | 33.8%          | 0.9%              |
| Tironi, 2010 <sup>184</sup>         | 28.4%                 | 23.3%      | 33.9%          | 0.9%              |
| Zanatta, 2015 <sup>185</sup>        | 27.8%                 | 14.2%      | 45.2%          | 0.8%              |
| Govêia, 2018 <sup>186</sup>         | 34.2%                 | 20.1%      | 50.6%          | 0.8%              |
| Aguirre Roldan, 2015 <sup>187</sup> | 26.4%                 | 18.3%      | 35.9%          | 0.9%              |
|                                     |                       |            |                |                   |
| Number of studies combined:         | k = 115               |            |                |                   |
|                                     |                       |            |                |                   |
| Random effects model                | 23.5%                 | 20.6%      | 26.7%          |                   |
|                                     |                       |            |                |                   |
| Quantifying heterogeneity:          | $\tau^2 = 0.793$      | H = 7.48   | $I^2 = 98.2\%$ |                   |
|                                     |                       |            |                |                   |
| Test of heterogeneity:              |                       |            |                |                   |
|                                     | Q                     | d.f.       | p-value        |                   |
|                                     | 6378                  | 114        | <0.0001        |                   |

**eTable 14.** Meta-analysis of the Prevalence of a Diminished Sense of Personal Accomplishment Stratified by Assessment Method

| Definition of Low PA               | k        | Prevalence (%) | LCI         | UCI   | Q        | $\tau^2$ | $I^2$ |
|------------------------------------|----------|----------------|-------------|-------|----------|----------|-------|
| 5-item Measure of MBI-PA $\leq$ 33 | 1        | 39.6%          | 34.9%       | 44.4% | 0        | --       | --    |
| aMBI-PA $\leq$ 31                  | 1        | 63.4%          | 53.6%       | 72.2% | 0        | --       | --    |
| aMBI-PA $\leq$ 33                  | 2        | 32.1%          | 12.3%       | 61.6% | 17       | 0.7      | 94.2% |
| aMBI-PA $\leq$ 6                   | 1        | 87.1%          | 83.8%       | 89.8% | 0        | --       | --    |
| CESQT-PA<Lowest Tertile            | 1        | 26.4%          | 18.9%       | 35.6% | 0        | --       | --    |
| MBI-PA High Frequency Percentage   | 1        | 4.2%           | 2.0%        | 8.5%  | 0        | --       | --    |
| MBI-PA Low                         | 20       | 17.8%          | 13.4%       | 23.2% | 274      | 0.5      | 93.1% |
| MBI-PA $\leq$ 29                   | 4        | 31.9%          | 13.0%       | 59.5% | 44       | 1.2      | 93.2% |
| MBI-PA $\leq$ 30                   | 3        | 27.6%          | 13.5%       | 48.2% | 17       | 0.5      | 87.9% |
| MBI-PA $\leq$ 31                   | 14       | 21.4%          | 14.0%       | 31.3% | 702      | 0.9      | 98.1% |
| MBI-PA $\leq$ 32                   | 8        | 19.5%          | 13.4%       | 27.4% | 253      | 0.4      | 97.2% |
| MBI-PA $\leq$ 33                   | 40       | 29.0%          | 24.2%       | 34.3% | 216<br>7 | 0.6      | 98.2% |
| MBI-PA $\leq$ 36                   | 1        | 44.0%          | 38.2%       | 50.0% | 0        | --       | --    |
| MBI-PA $\leq$ 38                   | 1        | 23.0%          | 18.6%       | 28.0% | 0        | --       | --    |
| MBI-PA $\leq$ 39                   | 1        | 37.0%          | 32.5%       | 41.7% | 0        | --       | --    |
| MBI-PA<Lowest Quartile             | 2        | 25.2%          | 20.9%       | 30.2% | 0        | 0.0      | 0.0%  |
| MBI-PA<Lowest Tertile              | 1        | 13.1%          | 9.9%        | 17.2% | 0        | --       | --    |
| MBI-PE Low                         | 1        | 23.6%          | 14.3%       | 36.6% | 0        | --       | --    |
| MBI-PE $\leq$ 3.7                  | 1        | 5.1%           | 3.3%        | 7.9%  | 0        | --       | --    |
| MBI-PE $\leq$ 4.0                  | 1        | 73.3%          | 69.3%       | 76.9% | 0        | --       | --    |
| MBI-PE $\leq$ 9                    | 1        | 5.5%           | 2.5%        | 11.7% | 0        | --       | --    |
| MBI-PE<Lowest Tertile              | 1        | 25.8%          | 13.5%       | 43.7% | 0        | --       | --    |
| Mean MBI-PA $\leq$ 4               | 1        | 10.0%          | 5.5%        | 17.6% | 0        | --       | --    |
| Mean MBI-PA<3                      | 1        | 7.4%           | 5.9%        | 9.3%  | 0        | --       | --    |
| Modified MBI-PA $\leq$ 22          | 2        | 8.1%           | 6.9%        | 9.5%  | 0        | 0.0      | 0.0%  |
| UBOS-PA Low                        | 2        | 12.9%          | 4.4%        | 32.2% | 5        | 0.6      | 79.7% |
| UBOS-PA $\leq$ 3.7                 | 2        | 14.7%          | 13.0%       | 16.7% | 1        | 0.0      | 0.0%  |
|                                    |          |                |             |       |          |          |       |
| Test for subgroup differences:     |          |                |             |       |          |          |       |
|                                    | Q        | d.f.           | p-value     |       |          |          |       |
| Between groups                     | 17<br>19 | 26             | <0.000<br>1 |       |          |          |       |

**eTable 15.** Meta-analysis of the Prevalence of Overall Burnout Stratified by Country and Continent or Region

**A. By Country:**

|                                | <b>k</b> | <b>Prevalence (%)</b> | <b>LCI</b> | <b>UCI</b> | <b>Q</b> | <b><math>\tau^2</math></b> | <b><math>I^2</math></b> |
|--------------------------------|----------|-----------------------|------------|------------|----------|----------------------------|-------------------------|
| Argentina                      | 1        | 10.6%                 | 6.2%       | 17.4%      | 0        | --                         | --                      |
| Armenia                        | 1        | 18.3%                 | 12.4%      | 26.3%      | 0        | --                         | --                      |
| Australia                      | 1        | 25.0%                 | 14.0%      | 40.5%      | 0        | --                         | --                      |
| Australia, New Zealand         | 1        | 2.7%                  | 1.2%       | 5.9%       | 0        | --                         | --                      |
| Austria                        | 1        | 50.7%                 | 49.4%      | 52.0%      | 0        | --                         | --                      |
| Belgium                        | 1        | 5.1%                  | 4.0%       | 6.6%       | 0        | --                         | --                      |
| Brazil                         | 7        | 11.2%                 | 4.7%       | 24.3%      | 85       | 1.4                        | 93.0%                   |
| Canada                         | 1        | 61.1%                 | 37.9%      | 80.2%      | 0        | --                         | --                      |
| Canada, United States          | 1        | 61.8%                 | 50.5%      | 72.0%      | 0        | --                         | --                      |
| China                          | 5        | 24.0%                 | 6.7%       | 58.3%      | 1003     | 2.9                        | 99.6%                   |
| Colombia                       | 1        | 3.8%                  | 1.4%       | 9.6%       | 0        | --                         | --                      |
| Denmark                        | 4        | 5.7%                  | 1.5%       | 19.1%      | 191      | 1.9                        | 98.4%                   |
| France                         | 3        | 9.4%                  | 5.9%       | 14.5%      | 20       | 0.2                        | 89.8%                   |
| Germany                        | 1        | 10.9%                 | 9.6%       | 12.5%      | 0        | --                         | --                      |
| India                          | 1        | 10.0%                 | 0.6%       | 67.4%      | 0        | --                         | --                      |
| Ireland, United Kingdom        | 1        | 28.9%                 | 25.3%      | 32.7%      | 0        | --                         | --                      |
| Israel                         | 1        | 55.9%                 | 47.5%      | 64.0%      | 0        | --                         | --                      |
| Italy                          | 2        | 39.5%                 | 19.7%      | 63.4%      | 7        | 0.4                        | 85.5%                   |
| Japan                          | 2        | 21.7%                 | 20.2%      | 23.1%      | 0        | 0.0                        | 0.0%                    |
| Kuwait                         | 1        | 20.5%                 | 15.5%      | 26.7%      | 0        | --                         | --                      |
| Lithuania                      | 2        | 31.1%                 | 3.4%       | 85.5%      | 58       | 3.4                        | 98.3%                   |
| Morocco                        | 1        | 52.9%                 | 39.4%      | 66.1%      | 0        | --                         | --                      |
| Netherlands                    | 5        | 12.5%                 | 7.5%       | 20.2%      | 47       | 0.4                        | 91.5%                   |
| New Zealand                    | 2        | 15.7%                 | 8.3%       | 27.7%      | 2        | 0.2                        | 59.3%                   |
| Palestine                      | 1        | 9.9%                  | 5.9%       | 16.0%      | 0        | --                         | --                      |
| Peru                           | 1        | 3.7%                  | 3.0%       | 4.6%       | 0        | --                         | --                      |
| Portugal                       | 3        | 16.5%                 | 4.5%       | 45.1%      | 45       | 1.5                        | 95.6%                   |
| Qatar                          | 1        | 12.6%                 | 8.5%       | 18.2%      | 0        | --                         | --                      |
| Serbia                         | 1        | 6.3%                  | 3.7%       | 10.6%      | 0        | --                         | --                      |
| Singapore                      | 1        | 31.1%                 | 19.4%      | 45.9%      | 0        | --                         | --                      |
| Spain                          | 7        | 22.1%                 | 8.5%       | 46.2%      | 267      | 2.2                        | 97.8%                   |
| Switzerland                    | 4        | 12.9%                 | 3.3%       | 39.5%      | 267      | 2.2                        | 98.9%                   |
| United Kingdom                 | 2        | 32.3%                 | 11.4%      | 64.1%      | 24       | 0.9                        | 95.9%                   |
| United States                  | 51       | 28.3%                 | 24.8%      | 32.1%      | 4283     | 0.4                        | 98.8%                   |
| Uruguay                        | 1        | 51.2%                 | 40.5%      | 61.8%      | 0        | --                         | --                      |
| Venezuela                      | 1        | 55.9%                 | 39.2%      | 71.4%      | 0        | --                         | --                      |
| Yemen                          | 1        | 11.7%                 | 9.3%       | 14.7%      | 0        | --                         | --                      |
|                                |          |                       |            |            |          |                            |                         |
| Test for subgroup differences: |          |                       |            |            |          |                            |                         |
|                                | Q        | d.f.                  | p-value    |            |          |                            |                         |
| Between groups                 | 2618     | 36                    | <0.0001    |            |          |                            |                         |

**B. By Continent or Region:**

|                                | <b>k</b> | <b>Prevalence (%)</b> | <b>LCI</b> | <b>UCI</b> | <b>Q</b> | <b><math>\tau^2</math></b> | <b><math>I^2</math></b> |
|--------------------------------|----------|-----------------------|------------|------------|----------|----------------------------|-------------------------|
| Africa                         | 1        | 52.9%                 | 39.4%      | 66.1%      | 0        | --                         | --                      |
| Asia                           | 10       | 22.7%                 | 11.5%      | 39.9%      | 1362     | 1.6                        | 99.3%                   |
| Europe                         | 37       | 15.8%                 | 11.1%      | 21.8%      | 3424     | 1.5                        | 98.9%                   |
| Middle East                    | 5        | 19.0%                 | 8.6%       | 36.8%      | 126      | 1.0                        | 96.8%                   |
| North America                  | 53       | 29.3%                 | 25.7%      | 33.1%      | 4302     | 0.4                        | 98.8%                   |
| Oceania                        | 4        | 11.6%                 | 4.7%       | 25.7%      | 27       | 0.9                        | 89.1%                   |
| South America                  | 12       | 12.9%                 | 5.9%       | 25.9%      | 343      | 2.1                        | 96.8%                   |
|                                |          |                       |            |            |          |                            |                         |
| Test for subgroup differences: |          |                       |            |            |          |                            |                         |
|                                | Q        | d.f.                  | p-value    |            |          |                            |                         |
| Between groups                 | 38       | 6                     | <0.0001    |            |          |                            |                         |

**eTable 16.** Meta-analysis of the Prevalence of Emotional Exhaustion Stratified by Country and Continent or Region

**A. By Country:**

|                                | <b>k</b> | <b>Prevalence (%)</b> | <b>LCI</b> | <b>UCI</b> | <b>Q</b> | <b><math>\tau^2</math></b> | <b>I<sup>2</sup></b> |
|--------------------------------|----------|-----------------------|------------|------------|----------|----------------------------|----------------------|
| Argentina                      | 1        | 47.2%                 | 38.5%      | 56.0%      | 0        | --                         | --                   |
| Armenia                        | 1        | 34.4%                 | 26.7%      | 43.0%      | 0        | --                         | --                   |
| Australia                      | 6        | 24.6%                 | 19.7%      | 30.4%      | 20       | 0.1                        | 75.1%                |
| Australia, New Zealand         | 1        | 28.2%                 | 22.6%      | 34.5%      | 0        | --                         | --                   |
| Belgium                        | 2        | 38.7%                 | 36.0%      | 41.4%      | 0        | 0.0                        | 0.0%                 |
| Bosnia and Herzegovina         | 2        | 42.1%                 | 33.9%      | 50.7%      | 3        | 0.0                        | 63.6%                |
| Brazil                         | 7        | 39.1%                 | 32.4%      | 46.2%      | 20       | 0.1                        | 69.6%                |
| Canada                         | 6        | 33.8%                 | 20.5%      | 50.3%      | 63       | 0.6                        | 92.1%                |
| Canada, United States          | 1        | 46.2%                 | 35.5%      | 57.2%      | 0        | --                         | --                   |
| China                          | 1        | 50.9%                 | 44.4%      | 57.4%      | 0        | --                         | --                   |
| Colombia                       | 1        | 45.3%                 | 36.1%      | 54.8%      | 0        | --                         | --                   |
| Croatia                        | 1        | 42.4%                 | 34.1%      | 51.2%      | 0        | --                         | --                   |
| Denmark                        | 3        | 15.0%                 | 11.1%      | 20.1%      | 15       | 0.1                        | 86.8%                |
| France                         | 2        | 18.4%                 | 4.1%       | 54.4%      | 66       | 1.4                        | 98.5%                |
| Germany                        | 3        | 30.7%                 | 28.8%      | 32.7%      | 2        | 0.0                        | 0.0%                 |
| Greece                         | 1        | 16.5%                 | 10.5%      | 25.0%      | 0        | --                         | --                   |
| India                          | 2        | 34.4%                 | 9.3%       | 72.8%      | 2        | 0.9                        | 44.1%                |
| Iran                           | 2        | 26.9%                 | 8.2%       | 60.2%      | 16       | 1.0                        | 93.7%                |
| Ireland, United Kingdom        | 1        | 28.5%                 | 25.0%      | 32.4%      | 0        | --                         | --                   |
| Israel                         | 1        | 44.1%                 | 36.0%      | 52.6%      | 0        | --                         | --                   |
| Italy                          | 4        | 35.4%                 | 25.9%      | 46.2%      | 14       | 0.2                        | 78.6%                |
| Italy, Portugal, Spain         | 1        | 25.6%                 | 18.6%      | 34.1%      | 0        | --                         | --                   |
| Japan                          | 1        | 22.0%                 | 19.0%      | 25.2%      | 0        | --                         | --                   |
| Kuwait                         | 1        | 40.0%                 | 33.4%      | 46.9%      | 0        | --                         | --                   |
| Lithuania                      | 3        | 27.0%                 | 17.8%      | 38.7%      | 5        | 0.1                        | 63.1%                |
| Netherlands                    | 2        | 16.5%                 | 6.7%       | 35.0%      | 10       | 0.5                        | 90.3%                |
| New Zealand                    | 3        | 31.5%                 | 27.8%      | 35.5%      | 1        | 0.0                        | 0.0%                 |
| Pakistan                       | 1        | 42.4%                 | 35.1%      | 50.1%      | 0        | --                         | --                   |
| Palestine                      | 1        | 72.3%                 | 64.4%      | 79.1%      | 0        | --                         | --                   |
| Peru                           | 1        | 14.2%                 | 12.8%      | 15.7%      | 0        | --                         | --                   |
| Poland                         | 1        | 33.3%                 | 21.5%      | 47.7%      | 0        | --                         | --                   |
| Portugal                       | 1        | 25.3%                 | 19.0%      | 32.9%      | 0        | --                         | --                   |
| Romania                        | 1        | 38.2%                 | 27.5%      | 50.2%      | 0        | --                         | --                   |
| Saudi Arabia                   | 1        | 50.7%                 | 39.1%      | 62.3%      | 0        | --                         | --                   |
| Serbia                         | 4        | 47.6%                 | 37.7%      | 57.7%      | 26       | 0.2                        | 88.6%                |
| Spain                          | 9        | 34.3%                 | 29.6%      | 39.4%      | 36       | 0.1                        | 78.0%                |
| Switzerland                    | 2        | 25.4%                 | 13.9%      | 41.7%      | 36       | 0.3                        | 97.2%                |
| Taiwan                         | 1        | 49.2%                 | 44.9%      | 53.4%      | 0        | --                         | --                   |
| Turkey                         | 1        | 71.1%                 | 54.9%      | 83.2%      | 0        | --                         | --                   |
| United Kingdom                 | 4        | 38.0%                 | 32.0%      | 44.4%      | 30       | 0.1                        | 90.0%                |
| United States                  | 42       | 35.9%                 | 32.4%      | 39.5%      | 2052     | 0.2                        | 98.0%                |
| Yemen                          | 1        | 63.2%                 | 59.2%      | 67.1%      | 0        | --                         | --                   |
| Test for subgroup differences: |          |                       |            |            |          |                            |                      |
|                                | Q        | d.f.                  | p-value    |            |          |                            |                      |
| Between groups                 | 929      | 41                    | <0.0001    |            |          |                            |                      |



**B. By Continent or Region:**

|                                | <b>k</b> | <b>Prevalence (%)</b> | <b>LCI</b> | <b>UCI</b> | <b>Q</b> | <b><math>\tau^2</math></b> | <b><math>I^2</math></b> |
|--------------------------------|----------|-----------------------|------------|------------|----------|----------------------------|-------------------------|
| Asia                           | 9        | 43.6%                 | 33.9%      | 53.7%      | 143      | 0.3                        | 94.4%                   |
| Europe                         | 47       | 31.4%                 | 28.3%      | 34.6%      | 827      | 0.2                        | 94.4%                   |
| Middle East                    | 6        | 45.8%                 | 31.6%      | 60.7%      | 107      | 0.5                        | 95.3%                   |
| North America                  | 49       | 35.9%                 | 32.6%      | 39.2%      | 2121     | 0.2                        | 97.7%                   |
| Oceania                        | 10       | 27.2%                 | 23.8%      | 30.9%      | 26       | 0.0                        | 66.0%                   |
| South America                  | 10       | 35.3%                 | 22.8%      | 50.3%      | 353      | 0.9                        | 97.4%                   |
|                                |          |                       |            |            |          |                            |                         |
| Test for subgroup differences: |          |                       |            |            |          |                            |                         |
|                                | Q        | d.f.                  | p-value    |            |          |                            |                         |
| Between groups                 | 21       | 5                     | <0.0001    |            |          |                            |                         |

**eTable 17.** Meta-analysis of the Prevalence of Depersonalization Stratified by Country and Continent or Region

**A. By Country:**

|                                | <b>k</b> | <b>Prevalence (%)</b> | <b>LCI</b> | <b>UCI</b> | <b>Q</b> | <b><math>\tau^2</math></b> | <b>I<sup>2</sup></b> |
|--------------------------------|----------|-----------------------|------------|------------|----------|----------------------------|----------------------|
| Argentina                      | 1        | 22.8%                 | 16.2%      | 31.0%      | 0        | --                         | --                   |
| Armenia                        | 1        | 51.2%                 | 42.6%      | 59.7%      | 0        | --                         | --                   |
| Australia                      | 5        | 10.1%                 | 5.6%       | 17.6%      | 41       | 0.4                        | 90.3%                |
| Australia, New Zealand         | 1        | 19.1%                 | 14.4%      | 24.8%      | 0        | --                         | --                   |
| Belgium                        | 2        | 27.1%                 | 24.7%      | 29.7%      | 0        | 0.0                        | 0.0%                 |
| Bosnia and Herzegovina         | 2        | 32.3%                 | 13.6%      | 59.0%      | 24       | 0.6                        | 95.9%                |
| Brazil                         | 7        | 28.5%                 | 23.8%      | 33.6%      | 12       | 0.0                        | 49.3%                |
| Canada                         | 6        | 43.1%                 | 32.3%      | 54.7%      | 32       | 0.3                        | 84.3%                |
| Canada, United States          | 1        | 41.3%                 | 30.8%      | 52.7%      | 0        | --                         | --                   |
| China                          | 1        | 53.1%                 | 46.6%      | 59.5%      | 0        | --                         | --                   |
| Colombia                       | 1        | 18.9%                 | 12.5%      | 27.5%      | 0        | --                         | --                   |
| Croatia                        | 1        | 16.0%                 | 10.6%      | 23.5%      | 0        | --                         | --                   |
| Denmark                        | 3        | 15.1%                 | 13.4%      | 17.1%      | 3        | 0.0                        | 25.9%                |
| France                         | 2        | 9.3%                  | 1.7%       | 38.2%      | 37       | 1.6                        | 97.3%                |
| Germany                        | 2        | 38.3%                 | 20.9%      | 59.4%      | 8        | 0.3                        | 87.0%                |
| Greece                         | 1        | 8.7%                  | 4.6%       | 16.0%      | 0        | --                         | --                   |
| India                          | 2        | 40.6%                 | 4.4%       | 91.0%      | 4        | 3.0                        | 72.7%                |
| Iran                           | 2        | 13.7%                 | 9.3%       | 19.6%      | 0        | 0.0                        | 0.0%                 |
| Ireland, United Kingdom        | 1        | 27.0%                 | 23.5%      | 30.7%      | 0        | --                         | --                   |
| Israel                         | 1        | 36.0%                 | 28.4%      | 44.4%      | 0        | --                         | --                   |
| Italy                          | 4        | 34.8%                 | 25.4%      | 45.5%      | 14       | 0.2                        | 78.1%                |
| Italy, Portugal, Spain         | 1        | 22.3%                 | 15.8%      | 30.6%      | 0        | --                         | --                   |
| Japan                          | 1        | 11.1%                 | 8.9%       | 13.6%      | 0        | --                         | --                   |
| Kuwait                         | 1        | 45.5%                 | 38.7%      | 52.4%      | 0        | --                         | --                   |
| Lithuania                      | 3        | 25.0%                 | 20.5%      | 30.1%      | 1        | 0.0                        | 0.0%                 |
| Netherlands                    | 2        | 19.3%                 | 3.0%       | 65.0%      | 43       | 2.1                        | 97.7%                |
| New Zealand                    | 3        | 20.6%                 | 12.7%      | 31.6%      | 12       | 0.2                        | 83.6%                |
| Pakistan                       | 1        | 72.9%                 | 65.8%      | 79.1%      | 0        | --                         | --                   |
| Palestine                      | 1        | 32.1%                 | 24.9%      | 40.3%      | 0        | --                         | --                   |
| Peru                           | 1        | 16.8%                 | 15.3%      | 18.4%      | 0        | --                         | --                   |
| Poland                         | 1        | 35.4%                 | 23.3%      | 49.8%      | 0        | --                         | --                   |
| Portugal                       | 1        | 16.0%                 | 11.0%      | 22.8%      | 0        | --                         | --                   |
| Romania                        | 1        | 42.7%                 | 31.5%      | 54.6%      | 0        | --                         | --                   |
| Saudi Arabia                   | 1        | 59.4%                 | 47.5%      | 70.3%      | 0        | --                         | --                   |
| Serbia                         | 4        | 12.6%                 | 9.1%       | 17.2%      | 7        | 0.1                        | 58.2%                |
| Spain                          | 8        | 29.7%                 | 22.5%      | 38.0%      | 69       | 0.2                        | 89.8%                |
| Switzerland                    | 2        | 24.3%                 | 19.2%      | 30.2%      | 6        | 0.0                        | 82.1%                |
| Taiwan                         | 1        | 52.0%                 | 47.7%      | 56.2%      | 0        | --                         | --                   |
| Turkey                         | 1        | 79.0%                 | 63.2%      | 89.1%      | 0        | --                         | --                   |
| United Kingdom                 | 3        | 31.0%                 | 19.8%      | 45.0%      | 50       | 0.3                        | 96.0%                |
| United States                  | 39       | 23.7%                 | 20.7%      | 26.9%      | 1796     | 0.3                        | 97.9%                |
| Yemen                          | 1        | 19.4%                 | 16.3%      | 22.8%      | 0        | --                         | --                   |
|                                |          |                       |            |            |          |                            |                      |
| Test for subgroup differences: |          |                       |            |            |          |                            |                      |
|                                | Q        | d.f.                  | p-value    |            |          |                            |                      |
| Between groups                 | 937      | 41                    | <0.0001    |            |          |                            |                      |

**B. By Continent or Region:**

|                                | <b>k</b> | <b>Prevalence (%)</b> | <b>LCI</b> | <b>UCI</b> | <b>Q</b> | <b><math>\tau^2</math></b> | <b>I<sup>2</sup></b> |
|--------------------------------|----------|-----------------------|------------|------------|----------|----------------------------|----------------------|
| Asia                           | 9        | 51.9%                 | 34.7%      | 68.7%      | 396      | 1.1                        | 98.0%                |
| Europe                         | 44       | 24.0%                 | 20.7%      | 27.7%      | 990      | 0.4                        | 95.7%                |
| Middle East                    | 6        | 25.5%                 | 16.6%      | 36.9%      | 72       | 0.4                        | 93.0%                |
| North America                  | 46       | 25.9%                 | 22.9%      | 29.2%      | 1980     | 0.3                        | 97.7%                |
| Oceania                        | 9        | 14.5%                 | 10.1%      | 20.3%      | 77       | 0.3                        | 89.6%                |
| South America                  | 10       | 25.4%                 | 20.5%      | 30.9%      | 52       | 0.1                        | 82.8%                |
|                                |          |                       |            |            |          |                            |                      |
| Test for subgroup differences: |          |                       |            |            |          |                            |                      |
|                                | Q        | d.f.                  | p-value    |            |          |                            |                      |
| Between groups                 | 22       | 5                     | <0.0001    |            |          |                            |                      |

**eTable 18.** Meta-analysis of the Prevalence of a Diminished Sense of Personal Accomplishment Stratified by Country and Continent or Region

**A. By Country:**

|                                | <b>k</b> | <b>Prevalence (%)</b> | <b>LCI</b> | <b>UCI</b> | <b>Q</b> | <b><math>\tau^2</math></b> | <b><math>I^2</math></b> |
|--------------------------------|----------|-----------------------|------------|------------|----------|----------------------------|-------------------------|
| Argentina                      | 1        | 34.2%                 | 26.3%      | 42.9%      | 0        | --                         | --                      |
| Armenia                        | 1        | 50.0%                 | 41.5%      | 58.5%      | 0        | --                         | --                      |
| Australia                      | 5        | 7.7%                  | 2.1%       | 24.2%      | 183      | 2.0                        | 97.8%                   |
| Australia, New Zealand         | 1        | 24.1%                 | 18.9%      | 30.2%      | 0        | --                         | --                      |
| Belgium                        | 2        | 11.7%                 | 5.7%       | 22.4%      | 3        | 0.2                        | 68.1%                   |
| Bosnia and Herzegovina         | 2        | 46.3%                 | 39.3%      | 53.4%      | 2        | 0.0                        | 47.9%                   |
| Brazil                         | 7        | 33.9%                 | 25.4%      | 43.7%      | 37       | 0.2                        | 83.7%                   |
| Canada                         | 6        | 27.7%                 | 18.5%      | 39.2%      | 34       | 0.3                        | 85.2%                   |
| Canada, United States          | 1        | 4.1%                  | 1.3%       | 11.8%      | 0        | --                         | --                      |
| China                          | 1        | 55.3%                 | 48.8%      | 61.7%      | 0        | --                         | --                      |
| Colombia                       | 1        | 26.4%                 | 18.9%      | 35.6%      | 0        | --                         | --                      |
| Croatia                        | 1        | 60.0%                 | 51.2%      | 68.2%      | 0        | --                         | --                      |
| Denmark                        | 3        | 33.5%                 | 28.4%      | 39.0%      | 12       | 0.0                        | 83.5%                   |
| France                         | 2        | 42.2%                 | 11.3%      | 80.7%      | 149      | 1.6                        | 99.3%                   |
| Germany                        | 2        | 20.9%                 | 5.1%       | 56.7%      | 12       | 1.2                        | 91.7%                   |
| India                          | 2        | 77.1%                 | 35.6%      | 95.3%      | 4        | 1.3                        | 72.2%                   |
| Iran                           | 2        | 27.5%                 | 3.4%       | 80.4%      | 36       | 2.9                        | 97.2%                   |
| Ireland, United Kingdom        | 1        | 31.3%                 | 27.6%      | 35.2%      | 0        | --                         | --                      |
| Israel                         | 1        | 31.6%                 | 24.4%      | 39.9%      | 0        | --                         | --                      |
| Italy                          | 4        | 15.6%                 | 11.5%      | 20.7%      | 5        | 0.1                        | 43.3%                   |
| Italy, Portugal, Spain         | 1        | 21.5%                 | 15.1%      | 29.7%      | 0        | --                         | --                      |
| Japan                          | 1        | 62.0%                 | 58.3%      | 65.5%      | 0        | --                         | --                      |
| Kuwait                         | 1        | 46.5%                 | 39.7%      | 53.4%      | 0        | --                         | --                      |
| Lithuania                      | 3        | 38.0%                 | 31.6%      | 44.8%      | 2        | 0.0                        | 17.2%                   |
| Netherlands                    | 2        | 15.9%                 | 10.4%      | 23.6%      | 2        | 0.1                        | 59.2%                   |
| New Zealand                    | 3        | 30.1%                 | 23.1%      | 38.1%      | 6        | 0.1                        | 68.2%                   |
| Palestine                      | 1        | 32.1%                 | 24.9%      | 40.3%      | 0        | --                         | --                      |
| Peru                           | 1        | 18.1%                 | 16.5%      | 19.7%      | 0        | --                         | --                      |
| Portugal                       | 1        | 16.7%                 | 11.5%      | 23.5%      | 0        | --                         | --                      |
| Romania                        | 1        | 47.1%                 | 35.6%      | 58.9%      | 0        | --                         | --                      |
| Saudi Arabia                   | 1        | 17.4%                 | 10.2%      | 28.2%      | 0        | --                         | --                      |
| Serbia                         | 4        | 10.2%                 | 3.7%       | 25.1%      | 59       | 1.0                        | 94.9%                   |
| Spain                          | 8        | 17.8%                 | 10.2%      | 29.3%      | 144      | 0.8                        | 95.1%                   |
| Switzerland                    | 2        | 17.4%                 | 14.6%      | 20.7%      | 2        | 0.0                        | 56.7%                   |
| Taiwan                         | 1        | 73.3%                 | 69.3%      | 76.9%      | 0        | --                         | --                      |
| Turkey                         | 1        | 29.0%                 | 16.8%      | 45.1%      | 0        | --                         | --                      |
| United Kingdom                 | 2        | 31.3%                 | 26.7%      | 36.3%      | 3        | 0.0                        | 65.3%                   |
| United States                  | 34       | 17.3%                 | 14.4%      | 20.6%      | 1208     | 0.4                        | 97.3%                   |
| Yemen                          | 1        | 33.0%                 | 29.3%      | 37.0%      | 0        | --                         | --                      |
|                                |          |                       |            |            |          |                            |                         |
| Test for subgroup differences: |          |                       |            |            |          |                            |                         |
|                                | Q        | d.f.                  | p-value    |            |          |                            |                         |
| Between groups                 | 1158     | 38                    | <0.0001    |            |          |                            |                         |

**B. By Continent or Region:**

|                                | <b>k</b> | <b>Prevalence (%)</b> | <b>LCI</b> | <b>UCI</b> | <b>Q</b> | <b><math>\tau^2</math></b> | <b><math>I^2</math></b> |
|--------------------------------|----------|-----------------------|------------|------------|----------|----------------------------|-------------------------|
| Asia                           | 8        | 55.3%                 | 41.2%      | 68.6%      | 196      | 0.6                        | 96.4%                   |
| Europe                         | 41       | 23.5%                 | 19.3%      | 28.2%      | 1546     | 0.6                        | 97.4%                   |
| Middle East                    | 6        | 33.8%                 | 25.1%      | 43.9%      | 50       | 0.2                        | 89.9%                   |
| North America                  | 41       | 18.2%                 | 15.3%      | 21.5%      | 1373     | 0.4                        | 97.1%                   |
| Oceania                        | 9        | 16.7%                 | 9.7%       | 27.4%      | 209      | 0.8                        | 96.2%                   |
| South America                  | 10       | 31.0%                 | 23.7%      | 39.3%      | 109      | 0.3                        | 91.7%                   |
|                                |          |                       |            |            |          |                            |                         |
| Test for subgroup differences: |          |                       |            |            |          |                            |                         |
|                                | Q        | d.f.                  | p-value    |            |          |                            |                         |
| Between groups                 | 44       | 5                     | <0.0001    |            |          |                            |                         |

**eTable 19.** Meta-analysis of the Prevalence of Overall Burnout Stratified by Specialty

|                                | <b>k</b> | <b>Prevalence (%)</b> | <b>LCI</b> | <b>UCI</b> | <b>Q</b> | <b><math>\tau^2</math></b> | <b><math>I^2</math></b> |
|--------------------------------|----------|-----------------------|------------|------------|----------|----------------------------|-------------------------|
| Anesthesia                     | 8        | 18.7%                 | 6.6%       | 42.8%      | 640      | 2.7                        | 98.9%                   |
| Emergency Medicine             | 8        | 25.0%                 | 18.3%      | 33.2%      | 39       | 0.2                        | 81.8%                   |
| ENT                            | 5        | 5.3%                  | 1.1%       | 22.2%      | 118      | 3.1                        | 96.6%                   |
| Family Medicine                | 1        | 20.5%                 | 15.5%      | 26.7%      | 0        | --                         | --                      |
| Forensics                      | 1        | 21.4%                 | 13.9%      | 31.5%      | 0        | --                         | --                      |
| General Practice               | 9        | 7.8%                  | 4.2%       | 13.9%      | 157      | 0.9                        | 94.9%                   |
| Headache Medicine              | 1        | 57.5%                 | 48.7%      | 65.8%      | 0        | --                         | --                      |
| Hospitalist Medicine           | 2        | 27.0%                 | 21.0%      | 34.0%      | 4        | 0.0                        | 76.5%                   |
| Intensive Care                 | 8        | 27.6%                 | 17.1%      | 41.4%      | 157      | 0.7                        | 95.5%                   |
| Internal Medicine              | 5        | 35.8%                 | 28.0%      | 44.4%      | 31       | 0.1                        | 87.0%                   |
| Multiple Specialties           | 34       | 19.1%                 | 14.8%      | 24.2%      | 5454     | 0.8                        | 99.4%                   |
| Neonatology                    | 1        | 20.8%                 | 17.2%      | 24.9%      | 0        | --                         | --                      |
| Neurology                      | 1        | 60.1%                 | 57.7%      | 62.5%      | 0        | --                         | --                      |
| Neurosurgery                   | 1        | 27.2%                 | 18.6%      | 37.8%      | 0        | --                         | --                      |
| Obstetrics and Gynecology      | 2        | 13.0%                 | 1.5%       | 60.4%      | 25       | 2.7                        | 96.1%                   |
| Occupational Medicine          | 1        | 11.8%                 | 10.2%      | 13.6%      | 0        | --                         | --                      |
| Oncology                       | 3        | 54.3%                 | 43.3%      | 64.9%      | 77       | 0.1                        | 97.4%                   |
| Ophthalmology                  | 1        | 8.9%                  | 4.7%       | 16.3%      | 0        | --                         | --                      |
| Orthopedic Surgery             | 1        | 16.7%                 | 4.2%       | 47.7%      | 0        | --                         | --                      |
| Palliative Care                | 3        | 31.6%                 | 8.5%       | 69.8%      | 74       | 1.9                        | 97.3%                   |
| Pediatric Critical Care        | 2        | 17.5%                 | 11.4%      | 25.7%      | 6        | 0.1                        | 82.4%                   |
| Pediatrics                     | 5        | 21.8%                 | 12.6%      | 35.0%      | 45       | 0.5                        | 91.1%                   |
| Primary Care                   | 8        | 20.6%                 | 10.9%      | 35.5%      | 703      | 1.0                        | 99.0%                   |
| Psychiatry                     | 1        | 52.0%                 | 38.4%      | 65.4%      | 0        | --                         | --                      |
| Radiation Oncology             | 2        | 3.8%                  | 1.7%       | 8.4%       | 2        | 0.1                        | 33.2%                   |
| Radiology                      | 1        | 80.5%                 | 76.3%      | 84.1%      | 0        | --                         | --                      |
| Surgery                        | 6        | 32.8%                 | 25.9%      | 40.6%      | 319      | 0.1                        | 98.4%                   |
| Urology                        | 1        | 28.9%                 | 25.3%      | 32.7%      | 0        | --                         | --                      |
|                                |          |                       |            |            |          |                            |                         |
| Test for subgroup differences: |          |                       |            |            |          |                            |                         |
|                                | Q        | d.f.                  | p-value    |            |          |                            |                         |
| Between groups                 | 1238     | 27                    | <0.0001    |            |          |                            |                         |

**eTable 20.** Meta-analysis of the Prevalence of Emotional Exhaustion Stratified by Specialty

|                                | <b>k</b> | <b>Prevalence (%)</b> | <b>LCI</b> | <b>UCI</b> | <b>Q</b> | <b><math>\tau^2</math></b> | <b>I<sup>2</sup></b> |
|--------------------------------|----------|-----------------------|------------|------------|----------|----------------------------|----------------------|
| Allergy and Immunology         | 1        | 33.4%                 | 29.0%      | 38.2%      | 0        | --                         | --                   |
| Anesthesia                     | 6        | 32.0%                 | 21.3%      | 45.1%      | 69       | 0.4                        | 92.7%                |
| Concierge Medicine             | 1        | 19.6%                 | 14.3%      | 26.3%      | 0        | --                         | --                   |
| Emergency Medicine             | 10       | 34.0%                 | 21.6%      | 49.1%      | 246      | 0.9                        | 96.3%                |
| ENT                            | 4        | 23.3%                 | 20.2%      | 26.8%      | 2        | 0.0                        | 0.0%                 |
| Family Medicine                | 2        | 40.9%                 | 35.7%      | 46.4%      | 0        | 0.0                        | 0.0%                 |
| Forensics                      | 1        | 25.0%                 | 16.9%      | 35.3%      | 0        | --                         | --                   |
| General Practice               | 9        | 24.8%                 | 17.5%      | 33.9%      | 183      | 0.4                        | 95.6%                |
| Gynecologic Oncology           | 2        | 34.9%                 | 24.2%      | 47.4%      | 0        | 0.0                        | 0.0%                 |
| Headache Medicine              | 1        | 52.8%                 | 44.1%      | 61.3%      | 0        | --                         | --                   |
| Hematology/Oncology            | 1        | 32.2%                 | 24.5%      | 41.1%      | 0        | --                         | --                   |
| Infectious Disease             | 1        | 43.5%                 | 41.0%      | 46.1%      | 0        | --                         | --                   |
| Intensive Care                 | 4        | 38.3%                 | 27.6%      | 50.4%      | 21       | 0.2                        | 85.5%                |
| Internal Medicine              | 6        | 28.6%                 | 24.1%      | 33.4%      | 20       | 0.1                        | 74.7%                |
| Multiple Specialties           | 27       | 35.8%                 | 31.2%      | 40.7%      | 1375     | 0.3                        | 98.1%                |
| Neurology                      | 1        | 53.4%                 | 51.0%      | 55.9%      | 0        | --                         | --                   |
| Neurosurgery                   | 2        | 18.7%                 | 9.9%       | 32.3%      | 2        | 0.1                        | 51.3%                |
| Obstetrics and Gynecology      | 4        | 40.0%                 | 31.0%      | 49.8%      | 24       | 0.1                        | 87.7%                |
| Occupational Medicine          | 1        | 34.3%                 | 31.9%      | 36.8%      | 0        | --                         | --                   |
| Oncology                       | 3        | 34.3%                 | 26.6%      | 43.0%      | 7        | 0.1                        | 72.9%                |
| Ophthalmology                  | 2        | 38.3%                 | 26.4%      | 51.7%      | 4        | 0.1                        | 74.6%                |
| Orthopedic Surgery             | 4        | 42.1%                 | 37.1%      | 47.3%      | 3        | 0.0                        | 1.8%                 |
| Pain Medicine                  | 1        | 60.4%                 | 53.6%      | 66.8%      | 0        | --                         | --                   |
| Palliative Care                | 3        | 25.9%                 | 4.4%       | 72.6%      | 174      | 3.1                        | 98.8%                |
| Pediatric Critical Care        | 1        | 34.4%                 | 28.8%      | 40.5%      | 0        | --                         | --                   |
| Pediatrics                     | 4        | 32.2%                 | 18.2%      | 50.4%      | 30       | 0.5                        | 90.1%                |
| Primary Care                   | 10       | 37.9%                 | 29.2%      | 47.3%      | 324      | 0.4                        | 97.2%                |
| Psychiatry                     | 3        | 58.7%                 | 26.7%      | 84.7%      | 68       | 1.4                        | 97.0%                |
| Radiation Oncology             | 2        | 28.1%                 | 23.0%      | 33.8%      | 0        | 0.0                        | 0.0%                 |
| Radiology                      | 1        | 61.7%                 | 57.0%      | 66.3%      | 0        | --                         | --                   |
| Surgery                        | 11       | 31.4%                 | 27.8%      | 35.4%      | 194      | 0.1                        | 94.8%                |
| Urology                        | 2        | 30.7%                 | 23.9%      | 38.4%      | 2        | 0.0                        | 41.5%                |
|                                |          |                       |            |            |          |                            |                      |
| Test for subgroup differences: |          |                       |            |            |          |                            |                      |
|                                | Q        | d.f.                  | p-value    |            |          |                            |                      |
| Between groups                 | 466      | 31                    | <0.0001    |            |          |                            |                      |

**eTable 21.** Meta-analysis of the Prevalence of Depersonalization Stratified by Specialty

|                                | <b>k</b> | <b>Prevalence (%)</b> | <b>LCI</b> | <b>UCI</b> | <b>Q</b> | <b><math>\tau^2</math></b> | <b>I<sup>2</sup></b> |
|--------------------------------|----------|-----------------------|------------|------------|----------|----------------------------|----------------------|
| Allergy and Immunology         | 1        | 28.5%                 | 24.3%      | 33.1%      | 0        | --                         | --                   |
| Anesthesia                     | 6        | 26.8%                 | 18.6%      | 37.0%      | 41       | 0.3                        | 87.7%                |
| Concierge Medicine             | 1        | 6.0%                  | 3.2%       | 10.7%      | 0        | --                         | --                   |
| Emergency Medicine             | 9        | 37.1%                 | 18.7%      | 60.1%      | 373      | 1.9                        | 97.9%                |
| ENT                            | 4        | 18.2%                 | 15.3%      | 21.4%      | 3        | 0.0                        | 0.0%                 |
| Family Medicine                | 2        | 28.8%                 | 8.7%       | 63.2%      | 27       | 1.1                        | 96.4%                |
| Forensics                      | 1        | 40.5%                 | 30.6%      | 51.3%      | 0        | --                         | --                   |
| General Practice               | 8        | 18.9%                 | 11.1%      | 30.2%      | 242      | 0.8                        | 97.1%                |
| Gynecologic Oncology           | 2        | 12.8%                 | 6.5%       | 23.6%      | 0        | 0.0                        | 0.0%                 |
| Headache Medicine              | 1        | 21.3%                 | 15.0%      | 29.2%      | 0        | --                         | --                   |
| Hematology/Oncology            | 1        | 29.8%                 | 22.3%      | 38.5%      | 0        | --                         | --                   |
| Infectious Disease             | 1        | 40.3%                 | 37.8%      | 42.8%      | 0        | --                         | --                   |
| Intensive Care                 | 4        | 31.1%                 | 21.4%      | 42.7%      | 19       | 0.2                        | 84.0%                |
| Internal Medicine              | 6        | 16.3%                 | 10.2%      | 25.1%      | 73       | 0.4                        | 93.1%                |
| Multiple Specialties           | 25       | 31.2%                 | 26.4%      | 36.5%      | 1347     | 0.3                        | 98.2%                |
| Neurology                      | 1        | 41.4%                 | 39.0%      | 43.9%      | 0        | --                         | --                   |
| Neurosurgery                   | 2        | 23.4%                 | 14.4%      | 35.7%      | 1        | 0.1                        | 31.4%                |
| Obstetrics and Gynecology      | 3        | 23.6%                 | 8.3%       | 51.4%      | 42       | 1.1                        | 95.3%                |
| Occupational Medicine          | 1        | 20.1%                 | 18.1%      | 22.2%      | 0        | --                         | --                   |
| Oncology                       | 3        | 24.8%                 | 22.5%      | 27.2%      | 1        | 0.0                        | 0.0%                 |
| Ophthalmology                  | 2        | 25.2%                 | 7.6%       | 58.3%      | 18       | 1.0                        | 94.4%                |
| Orthopedic Surgery             | 3        | 37.4%                 | 16.8%      | 63.8%      | 23       | 0.8                        | 91.1%                |
| Pain Medicine                  | 1        | 35.8%                 | 29.5%      | 42.5%      | 0        | --                         | --                   |
| Palliative Care                | 3        | 9.4%                  | 2.1%       | 33.3%      | 49       | 1.8                        | 95.9%                |
| Pediatric Critical Care        | 1        | 19.8%                 | 15.4%      | 25.2%      | 0        | --                         | --                   |
| Pediatrics                     | 4        | 20.4%                 | 15.0%      | 27.2%      | 6        | 0.1                        | 49.0%                |
| Primary Care                   | 9        | 25.1%                 | 19.1%      | 32.2%      | 114      | 0.3                        | 93.0%                |
| Psychiatry                     | 3        | 48.5%                 | 10.1%      | 88.8%      | 123      | 3.5                        | 98.4%                |
| Radiation Oncology             | 2        | 18.4%                 | 14.2%      | 23.5%      | 0        | 0.0                        | 0.0%                 |
| Radiology                      | 1        | 53.3%                 | 48.5%      | 58.1%      | 0        | --                         | --                   |
| Surgery                        | 11       | 20.2%                 | 16.3%      | 24.7%      | 335      | 0.2                        | 97.0%                |
| Urology                        | 2        | 27.0%                 | 23.7%      | 30.6%      | 0        | 0.0                        | 0.0%                 |
|                                |          |                       |            |            |          |                            |                      |
| Test for subgroup differences: |          |                       |            |            |          |                            |                      |
|                                | Q        | d.f.                  | p-value    |            |          |                            |                      |
| Between groups                 | 520      | 31                    | <0.0001    |            |          |                            |                      |



**eTable 22.** Meta-analysis of the Prevalence of a Diminished Sense of Personal Accomplishment Stratified by Specialty

|                                | <b>k</b> | <b>Prevalence (%)</b> | <b>LCI</b> | <b>UCI</b> | <b>Q</b> | <b><math>\tau^2</math></b> | <b>I<sup>2</sup></b> |
|--------------------------------|----------|-----------------------|------------|------------|----------|----------------------------|----------------------|
| Allergy and Immunology         | 1        | 9.7%                  | 7.1%       | 12.9%      | 0        | --                         | --                   |
| Anesthesia                     | 6        | 38.0%                 | 32.7%      | 43.7%      | 13       | 0.0                        | 60.9%                |
| Concierge Medicine             | 1        | 4.2%                  | 2.0%       | 8.5%       | 0        | --                         | --                   |
| Emergency Medicine             | 7        | 37.8%                 | 27.3%      | 49.4%      | 33       | 0.3                        | 81.6%                |
| ENT                            | 4        | 16.5%                 | 5.9%       | 38.4%      | 68       | 1.3                        | 95.6%                |
| Family Medicine                | 2        | 53.0%                 | 39.8%      | 65.8%      | 6        | 0.1                        | 82.1%                |
| Forensics                      | 1        | 20.2%                 | 13.0%      | 30.2%      | 0        | --                         | --                   |
| General Practice               | 8        | 20.2%                 | 12.3%      | 31.3%      | 245      | 0.7                        | 97.1%                |
| Gynecologic Oncology           | 2        | 13.8%                 | 1.4%       | 63.8%      | 5        | 2.5                        | 80.9%                |
| Headache Medicine              | 1        | 11.8%                 | 7.3%       | 18.7%      | 0        | --                         | --                   |
| Hematology/Oncology            | 1        | 12.4%                 | 7.6%       | 19.6%      | 0        | --                         | --                   |
| Infectious Disease             | 1        | 8.2%                  | 6.9%       | 9.7%       | 0        | --                         | --                   |
| Intensive Care                 | 4        | 41.3%                 | 23.3%      | 62.1%      | 61       | 0.7                        | 95.1%                |
| Internal Medicine              | 3        | 11.9%                 | 8.6%       | 16.3%      | 5        | 0.1                        | 55.9%                |
| Multiple Specialties           | 24       | 31.3%                 | 23.8%      | 39.8%      | 2717     | 0.8                        | 99.2%                |
| Neurology                      | 1        | 21.2%                 | 19.3%      | 23.3%      | 0        | --                         | --                   |
| Neurosurgery                   | 2        | 26.8%                 | 19.4%      | 35.7%      | 0        | 0.0                        | 0.0%                 |
| Obstetrics and Gynecology      | 3        | 14.7%                 | 9.1%       | 23.0%      | 6        | 0.1                        | 67.9%                |
| Occupational Medicine          | 1        | 63.9%                 | 61.4%      | 66.3%      | 0        | --                         | --                   |
| Oncology                       | 3        | 14.1%                 | 8.8%       | 21.8%      | 9        | 0.2                        | 77.0%                |
| Ophthalmology                  | 2        | 43.2%                 | 13.1%      | 79.2%      | 32       | 1.3                        | 96.8%                |
| Orthopedic Surgery             | 3        | 12.1%                 | 2.8%       | 40.0%      | 19       | 1.7                        | 89.7%                |
| Pain Medicine                  | 1        | 19.3%                 | 14.5%      | 25.3%      | 0        | --                         | --                   |
| Palliative Care                | 2        | 9.7%                  | 1.0%       | 53.5%      | 6        | 2.5                        | 82.7%                |
| Pediatric Critical Care        | 1        | 21.4%                 | 16.8%      | 26.9%      | 0        | --                         | --                   |
| Pediatrics                     | 4        | 28.6%                 | 21.8%      | 36.5%      | 7        | 0.1                        | 54.9%                |
| Primary Care                   | 9        | 18.9%                 | 12.2%      | 28.2%      | 207      | 0.6                        | 96.1%                |
| Psychiatry                     | 3        | 15.9%                 | 7.9%       | 29.6%      | 14       | 0.4                        | 86.0%                |
| Radiation Oncology             | 2        | 26.0%                 | 20.1%      | 32.9%      | 1        | 0.0                        | 19.3%                |
| Radiology                      | 1        | 39.6%                 | 34.9%      | 44.4%      | 0        | --                         | --                   |
| Surgery                        | 9        | 14.0%                 | 8.8%       | 21.6%      | 356      | 0.6                        | 97.8%                |
| Urology                        | 2        | 19.3%                 | 5.6%       | 49.2%      | 9        | 0.9                        | 88.8%                |
|                                |          |                       |            |            |          |                            |                      |
| Test for subgroup differences: |          |                       |            |            |          |                            |                      |
|                                | Q        | d.f.                  | p-value    |            |          |                            |                      |
| Between groups                 | 1297     | 31                    | <0.0001    |            |          |                            |                      |

**eTable 23.** Associations Between Overall Burnout or Burnout Subcomponent Prevalence with Survey Year, Age, and Sex

|                                           | Range     | Slope  | SE    | Z    | LCI    | UCI   | <i>P</i> (mod) | Q (mod) | df(mod) | <i>P</i> (het) | Q (het) | df (het) |
|-------------------------------------------|-----------|--------|-------|------|--------|-------|----------------|---------|---------|----------------|---------|----------|
| <b>Overall Burnout</b>                    |           |        |       |      |        |       |                |         |         |                |         |          |
| Baseline Survey Year                      | 1989-2017 | 0.2%   | 0.4%  | 0.5  | -0.5%  | 0.9%  | 0.60           | 0.3     | 1       | <0.0001        | 23808   | 97       |
| Average Age                               | 29.8-56.9 | 0.2%   | 0.4%  | 0.7  | -0.5%  | 0.9%  | 0.49           | 0.5     | 1       | <0.0001        | 14012   | 63       |
| Percentage of Males                       | 10-97%    | 9.1%   | 10.4% | 0.9  | -11.4% | 29.5% | 0.39           | 0.8     | 1       | <0.0001        | 20044   | 91       |
| <b>Emotional Exhaustion</b>               |           |        |       |      |        |       |                |         |         |                |         |          |
| Baseline Survey Year                      | 1987-2017 | 0.2%   | 0.3%  | 0.8  | -0.3%  | 0.7%  | 0.41           | 0.7     | 1       | <0.0001        | 4838    | 93       |
| Average Age                               | 29.8-56.9 | 0.0%   | 0.3%  | 0.1  | -0.5%  | 0.5%  | 0.93           | 0.01    | 1       | <0.0001        | 3134    | 77       |
| Percentage of Males                       | 0-100%    | -14.4% | 5.7%  | -2.5 | -25.5% | -3.3% | 0.01           | 6.4     | 1       | <0.0001        | 4709    | 107      |
| <b>Depersonalization</b>                  |           |        |       |      |        |       |                |         |         |                |         |          |
| Baseline Survey Year                      | 1987-2017 | -0.04% | 0.3%  | -0.1 | -0.6%  | 0.5%  | 0.89           | 0.02    | 1       | <0.0001        | 4753    | 87       |
| Average Age                               | 29.8-56.9 | -0.1%  | 0.3%  | -0.3 | -0.7%  | 0.5%  | 0.76           | 0.1     | 1       | <0.0001        | 5211    | 76       |
| Percentage of Males                       | 0-100%    | -1.8%  | 6.9%  | -0.3 | -15.4% | 11.8% | 0.79           | 0.1     | 1       | <0.0001        | 6480    | 102      |
| <b>Diminished Personal Accomplishment</b> |           |        |       |      |        |       |                |         |         |                |         |          |
| Baseline Survey Year                      | 1987-2017 | 0.4%   | 0.3%  | 1.1  | -0.3%  | 1.1%  | 0.27           | 1.2     | 1       | <0.0001        | 7442    | 80       |
| Average Age                               | 29.8-56.9 | -0.4%  | 0.3%  | -1.3 | -1.1%  | 0.2%  | 0.20           | 1.7     | 1       | <0.0001        | 5340    | 72       |
| Percentage of Males                       | 0-100%    | -7.5%  | 7.8%  | -1.0 | -22.8% | 7.7%  | 0.33           | 0.9     | 1       | <0.0001        | 8567    | 95       |

**Abbreviations:** df, degrees of freedom; het, heterogeneity; LCI, lower 95% confidence interval; mod, moderators; SE, standard error; UCI, upper 95% confidence interval. Other abbreviations as per legend for eTable 6.

**eTable 24.** Meta-analysis of the Prevalence of Screening Positive for Depression

|                                 | Prevalence (%) | LCI   | UCI            | %W(random) |
|---------------------------------|----------------|-------|----------------|------------|
| Saijo, 2014 <sup>19</sup>       | 40.6%          | 36.2% | 45.1%          | 3.4%       |
| Asai, 2007 <sup>20</sup>        | 19.9%          | 17.0% | 23.1%          | 3.4%       |
| Wurm, 2016 <sup>27</sup>        | 10.3%          | 9.5%  | 11.1%          | 3.5%       |
| Grassi, 2000 <sup>49</sup>      | 22.3%          | 17.9% | 27.2%          | 3.3%       |
| van der Wal, 2016 <sup>59</sup> | 40.1%          | 35.8% | 44.5%          | 3.4%       |
| Arigoni, 2009 <sup>80</sup>     | 31.5%          | 26.8% | 36.5%          | 3.4%       |
| Taylor, 2005 <sup>86</sup>      | 32.0%          | 29.5% | 34.6%          | 3.5%       |
| Shanafelt, 2012 <sup>123</sup>  | 37.8%          | 36.7% | 38.9%          | 3.5%       |
| Shanafelt, 2015 <sup>124</sup>  | 39.8%          | 38.6% | 41.0%          | 3.5%       |
| Shanafelt, 2009 <sup>135</sup>  | 30.0%          | 29.0% | 31.0%          | 3.5%       |
| Xiao, 2014 <sup>11</sup>        | 37.1%          | 30.5% | 44.1%          | 3.3%       |
| Zafar, 2016 <sup>21</sup>       | 39.3%          | 31.9% | 47.1%          | 3.2%       |
| Bressi, 2009 <sup>46</sup>      | 23.5%          | 14.8% | 34.2%          | 2.8%       |
| Bressi, 2008 <sup>47</sup>      | 36.4%          | 27.8% | 45.6%          | 3.1%       |
| Volpe, 2014 <sup>51</sup>       | 6.0%           | 1.3%  | 16.6%          | 1.5%       |
| Mikalauskas, 2018 <sup>54</sup> | 24.6%          | 19.0% | 30.8%          | 3.2%       |
| Mikalauskas, 2012 <sup>55</sup> | 47.5%          | 34.3% | 60.9%          | 2.8%       |
| Ruitenburg, 2012 <sup>56</sup>  | 26.9%          | 21.1% | 33.3%          | 3.3%       |
| Sharma, 2008 <sup>88</sup>      | 32.9%          | 28.7% | 37.2%          | 3.4%       |
| Abdulla, 2011 <sup>94</sup>     | 67.9%          | 60.2% | 74.8%          | 3.2%       |
| Elit, 2004 <sup>101</sup>       | 25.7%          | 12.5% | 43.3%          | 2.3%       |
| Shenoi, 2018 <sup>111</sup>     | 30.8%          | 25.2% | 36.9%          | 3.3%       |
| Lu, 2015 <sup>113</sup>         | 18.5%          | 9.3%  | 31.4%          | 2.4%       |
| Rath, 2015 <sup>114</sup>       | 33.4%          | 28.8% | 38.3%          | 3.4%       |
| Guest, 2011 <sup>130</sup>      | 26.8%          | 16.9% | 38.6%          | 2.8%       |
| De Stefano, 2018 <sup>137</sup> | 26.1%          | 10.2% | 48.4%          | 1.9%       |
| West, 2013 <sup>140</sup>       | 27.3%          | 22.2% | 32.9%          | 3.3%       |
| West, 2014 <sup>141</sup>       | 29.7%          | 19.7% | 41.5%          | 2.8%       |
| Balch, 2011 <sup>142</sup>      | 39.1%          | 37.9% | 40.2%          | 3.5%       |
| Starmer, 2016 <sup>159</sup>    | 6.7%           | 5.1%  | 8.6%           | 3.3%       |
| Stafford, 2010 <sup>169</sup>   | 17.2%          | 5.9%  | 35.8%          | 1.8%       |
| Dunwoodie, 2007 <sup>171</sup>  | 27.5%          | 14.6% | 43.9%          | 2.4%       |
| Bruce, 2005 <sup>177</sup>      | 12.0%          | 4.5%  | 24.3%          | 2.1%       |
|                                 |                |       |                |            |
| Number of studies combined:     | k = 33         |       |                |            |
|                                 |                |       |                |            |
|                                 | Prevalence (%) | LCI   | UCI            |            |
| Random effects model            | 28.6%          | 24.9% | 32.6%          |            |
|                                 |                |       |                |            |
| Quantifying heterogeneity:      |                |       |                |            |
| $\tau^2 = 0.26$                 | H = 7.80       |       | $I^2 = 98.4\%$ |            |
|                                 |                |       |                |            |
| Test of heterogeneity:          |                |       |                |            |
|                                 | Q              | d.f.  | p-value        |            |
|                                 | 1947.32        | 32    | 0              |            |

**eTable 25.** Meta-analysis of the Prevalence of Screening Positive for Depression Stratified by Assessment Method

|                                | <b>k</b> | <b>Prevalence (%)</b> | <b>LCI</b> | <b>UCI</b> | <b>Q</b> | <b><math>\tau^2</math></b> | <b><math>I^2</math></b> |
|--------------------------------|----------|-----------------------|------------|------------|----------|----------------------------|-------------------------|
| BDI-II $\geq$ 14               | 1        | 6.0%                  | 2.0%       | 17.0%      | 0        | --                         | --                      |
| BDI $\geq$ 19                  | 1        | 26.1%                 | 12.2%      | 47.2%      | 0        | --                         | --                      |
| BSI $\geq$ 0.41                | 1        | 26.9%                 | 21.4%      | 33.2%      | 0        | --                         | --                      |
| GHQ-12 $\geq$ 2                | 1        | 40.1%                 | 35.9%      | 44.4%      | 0        | --                         | --                      |
| GHQ-12 $\geq$ 4                | 14       | 27.9%                 | 24.4%      | 31.8%      | 66       | 0.1                        | 80.4%                   |
| HADS $\geq$ 9                  | 1        | 37.1%                 | 30.7%      | 43.9%      | 0        | --                         | --                      |
| MDI $\geq$ 20                  | 1        | 10.3%                 | 9.5%       | 11.1%      | 0        | --                         | --                      |
| PHQ-9 $\geq$ 5                 | 1        | 40.6%                 | 36.3%      | 45.0%      | 0        | --                         | --                      |
| Positive Single-item Screen    | 2        | 28.0%                 | 1.4%       | 91.4%      | 246      | 5.7                        | 99.6%                   |
| PRIME-MD $\geq$ 1              | 9        | 34.5%                 | 31.0%      | 38.1%      | 222      | 0.0                        | 96.4%                   |
| PRIME-MD $\geq$ 3              | 1        | 24.6%                 | 19.3%      | 30.7%      | 0        | --                         | --                      |
| Test for subgroup differences: |          |                       |            |            |          |                            |                         |
|                                | Q        | d.f.                  | p-value    |            |          |                            |                         |
| Between groups                 | 725.48   | 10                    | <0.0001    |            |          |                            |                         |

**eTable 26.** Correlation Coefficients Between Overall Burnout or Burnout Subcomponent Prevalence and Screening Positive for Depression

|                                | <b>Correlation Coefficient with Screening Positive for Depression</b> | <b>LCI</b> | <b>UCI</b> | <b><i>P</i></b> | <b><i>t</i></b> | <b>df</b> |
|--------------------------------|-----------------------------------------------------------------------|------------|------------|-----------------|-----------------|-----------|
| <b>Overall Burnout</b>         | -0.11                                                                 | -0.49      | 0.31       | <i>0.62</i>     | -0.50           | 22        |
| <b>Emotional Exhaustion</b>    | 0.05                                                                  | -0.35      | 0.44       | <i>0.81</i>     | 0.24            | 23        |
| <b>Depersonalization</b>       | 0.23                                                                  | -0.19      | 0.58       | <i>0.29</i>     | 1.09            | 22        |
| <b>Personal Accomplishment</b> | -0.10                                                                 | -0.52      | 0.36       | <i>0.69</i>     | -0.40           | 18        |

**eTable 27.** Within-instrument Heterogeneity Analyses of Studies Reporting on Burnout or Burnout Subcomponent Prevalence

| <b>A. Overall Burnout defined by (MBI-EE≥27 and MBI-DP≥10 and MBI-PA≤33)</b> |          |              |            |            |          |                        |                      |                |                |           |
|------------------------------------------------------------------------------|----------|--------------|------------|------------|----------|------------------------|----------------------|----------------|----------------|-----------|
| <b>Stratified Meta-analysis Results</b>                                      |          |              |            |            |          |                        |                      |                |                |           |
| <b>United States vs. Not</b>                                                 | <b>k</b> | <b>Prev.</b> | <b>LCI</b> | <b>UCI</b> | <b>Q</b> | <b>tau<sup>2</sup></b> | <b>I<sup>2</sup></b> | <b>P(diff)</b> | <b>Q(diff)</b> | <b>df</b> |
| Not United States                                                            | 17       | 9.5%         | 6.4%       | 13.9%      | 461      | 0.73                   | 96.5%                | 0.05           | 3.9            | 1         |
| United States                                                                | 4        | 4.5%         | 2.3%       | 8.5%       | 5        | 0.19                   | 39.0%                |                |                |           |
| <b>Country</b>                                                               |          |              |            |            |          |                        |                      |                |                |           |
| Armenia                                                                      | 1        | 18.3%        | 12.4%      | 26.3%      | 0        | --                     | --                   | <0.0001        | 336.9          | 13        |
| Brazil                                                                       | 2        | 14.4%        | 7.7%       | 25.4%      | 2        | 0.10                   | 33.8%                |                |                |           |
| China                                                                        | 1        | 31.4%        | 25.7%      | 37.8%      | 0        | --                     | --                   |                |                |           |
| Denmark                                                                      | 3        | 3.5%         | 2.2%       | 5.4%       | 5        | 0.11                   | 63.3%                |                |                |           |
| France                                                                       | 1        | 11.8%        | 10.2%      | 13.6%      | 0        | --                     | --                   |                |                |           |
| Germany                                                                      | 1        | 10.9%        | 9.6%       | 12.5%      | 0        | --                     | --                   |                |                |           |
| Italy                                                                        | 1        | 52.0%        | 38.4%      | 65.4%      | 0        | --                     | --                   |                |                |           |
| Kuwait                                                                       | 1        | 20.5%        | 15.5%      | 26.7%      | 0        | --                     | --                   |                |                |           |
| New Zealand                                                                  | 1        | 10.0%        | 4.2%       | 21.9%      | 0        | --                     | --                   |                |                |           |
| Peru                                                                         | 1        | 3.7%         | 3.0%       | 4.6%       | 0        | --                     | --                   |                |                |           |
| Portugal                                                                     | 1        | 2.0%         | 0.7%       | 6.0%       | 0        | --                     | --                   |                |                |           |
| Spain                                                                        | 1        | 16.3%        | 11.1%      | 23.4%      | 0        | --                     | --                   |                |                |           |
| Switzerland                                                                  | 2        | 4.5%         | 2.7%       | 7.4%       | 5        | 0.12                   | 78.6%                |                |                |           |
| United States                                                                | 4        | 4.5%         | 2.3%       | 8.5%       | 5        | 0.19                   | 39.0%                |                |                |           |
| <b>Continent</b>                                                             |          |              |            |            |          |                        |                      |                |                |           |
| Asia                                                                         | 2        | 24.7%        | 14.1%      | 39.8%      | 7        | 0.22                   | 85.0%                | <0.0001        | 32.9           | 5         |
| Europe                                                                       | 10       | 7.4%         | 4.6%       | 11.5%      | 230      | 0.56                   | 96.1%                |                |                |           |
| Middle East                                                                  | 1        | 20.5%        | 15.5%      | 26.7%      | 0        | --                     | --                   |                |                |           |
| North America                                                                | 4        | 4.5%         | 2.3%       | 8.5%       | 5        | 0.19                   | 39.0%                |                |                |           |
| Oceania                                                                      | 1        | 10.0%        | 4.2%       | 21.9%      | 0        | --                     | --                   |                |                |           |
| South America                                                                | 3        | 8.5%         | 2.6%       | 24.6%      | 29       | 1.13                   | 93.1%                |                |                |           |
| <b>Specialty</b>                                                             |          |              |            |            |          |                        |                      |                |                |           |
| Anesthesia                                                                   | 1        | 9.3%         | 3.5%       | 22.3%      | 0        | --                     | --                   | <0.0001        | 122.0          | 10        |
| ENT                                                                          | 3        | 3.7%         | 2.4%       | 5.7%       | 1        | 0                      | 0%                   |                |                |           |
| Family Medicine, General Practice                                            | 1        | 20.5%        | 15.5%      | 26.7%      | 0        | --                     | --                   |                |                |           |
| General Practice                                                             | 3        | 3.9%         | 1.8%       | 8.2%       | 7        | 0.35                   | 72.6%                |                |                |           |
| General Practice, Oncology, Pediatrics                                       | 1        | 6.0%         | 4.0%       | 8.9%       | 0        | --                     | --                   |                |                |           |

|                                                      |          |              |            |            |               |                        |                      |                |                |               |               |                |
|------------------------------------------------------|----------|--------------|------------|------------|---------------|------------------------|----------------------|----------------|----------------|---------------|---------------|----------------|
| Intensive Care                                       | 1        | 17.9%        | 10.5%      | 29.0%      | 0             | --                     | --                   |                |                |               |               |                |
| Multiple Specialties                                 | 5        | 10.6%        | 4.9%       | 21.3%      | 230           | 0.87                   | 98.3%                |                |                |               |               |                |
| Occupational Medicine                                | 1        | 11.8%        | 10.2%      | 13.6%      | 0             | --                     | --                   |                |                |               |               |                |
| Orthopedic Surgery                                   | 1        | 16.7%        | 4.2%       | 47.7%      | 0             | --                     | --                   |                |                |               |               |                |
| Primary Care                                         | 3        | 5.3%         | 1.5%       | 17.2%      | 43            | 1.23                   | 95.4%                |                |                |               |               |                |
| Psychiatry                                           | 1        | 52.0%        | 38.4%      | 65.4%      | 0             | --                     | --                   |                |                |               |               |                |
| <b>Meta-regression Results</b>                       |          |              |            |            |               |                        |                      |                |                |               |               |                |
| <b>Baseline Year (Range)</b>                         | <b>k</b> | <b>Slope</b> | <b>SE</b>  | <b>Z</b>   | <b>P(mod)</b> | <b>LCI</b>             | <b>UCI</b>           | <b>Q(mod)</b>  | <b>df(mod)</b> | <b>P(het)</b> | <b>Q(het)</b> | <b>df(het)</b> |
| 2002-2014                                            | 17       | 0.5%         | 0.5%       | 1.0        | 0.34          | -0.5%                  | 1.5%                 | 0.9            | 1              | <0.0001       | 298           | 15             |
| <b>Average Age (Range)</b>                           |          |              |            |            |               |                        |                      |                |                |               |               |                |
| 31.9-54.5                                            | 14       | -1.1%        | 0.4%       | -2.8       | 0.01          | -1.8%                  | -0.3%                | 7.8            | 1              | <0.0001       | 225           | 12             |
| <b>Proportion of Male Participants (Range)</b>       |          |              |            |            |               |                        |                      |                |                |               |               |                |
| 10-88%                                               | 19       | -19.3%       | 11.5%      | -1.7       | 0.09          | -41.9%                 | 3.3%                 | 2.8            | 1              | <0.0001       | 236           | 17             |
| <b>B. Emotional Exhaustion defined by MBI-EE ≥27</b> |          |              |            |            |               |                        |                      |                |                |               |               |                |
| <b>Stratified Meta-analysis Results</b>              |          |              |            |            |               |                        |                      |                |                |               |               |                |
| <b>United States vs. Not</b>                         | <b>k</b> | <b>Prev.</b> | <b>LCI</b> | <b>UCI</b> | <b>Q</b>      | <b>tau<sup>2</sup></b> | <b>I<sup>2</sup></b> | <b>P(diff)</b> | <b>Q(diff)</b> | <b>df</b>     |               |                |
| Not United States                                    | 41       | 34.7%        | 30.4%      | 39.2%      | 1226          | 0.38                   | 96.7%                | 0.75           | 0.1            | 1             |               |                |
| United States                                        | 16       | 35.7%        | 31.2%      | 40.5%      | 477           | 0.14                   | 96.9%                |                |                |               |               |                |
| <b>Country</b>                                       |          |              |            |            |               |                        |                      |                |                |               |               |                |
| Argentina                                            | 1        | 47.2%        | 38.5%      | 56.0%      | 0             | --                     | --                   | <0.0001        | 819.1          | 26            |               |                |
| Armenia                                              | 1        | 34.4%        | 26.7%      | 43.0%      | 0             | --                     | --                   |                |                |               |               |                |
| Australia                                            | 1        | 22.5%        | 12.1%      | 37.9%      | 0             | --                     | --                   |                |                |               |               |                |
| Australia, New Zealand                               | 1        | 28.2%        | 22.6%      | 34.5%      | 0             | --                     | --                   |                |                |               |               |                |
| Brazil                                               | 5        | 44.1%        | 38.6%      | 49.7%      | 8             | 0                      | 49.1%                |                |                |               |               |                |
| Canada                                               | 2        | 44.8%        | 33.2%      | 56.9%      | 1             | 0.05                   | 24.5%                |                |                |               |               |                |
| China                                                | 1        | 50.9%        | 44.4%      | 57.4%      | 0             | --                     | --                   |                |                |               |               |                |
| Croatia                                              | 1        | 42.4%        | 34.1%      | 51.2%      | 0             | --                     | --                   |                |                |               |               |                |
| Denmark                                              | 3        | 15.0%        | 11.1%      | 20.1%      | 15            | 0.08                   | 86.8%                |                |                |               |               |                |
| France                                               | 1        | 34.3%        | 31.9%      | 36.8%      | 0             | --                     | --                   |                |                |               |               |                |
| Germany                                              | 1        | 30.2%        | 28.1%      | 32.3%      | 0             | --                     | --                   |                |                |               |               |                |
| Iran                                                 | 1        | 42.9%        | 32.3%      | 54.1%      | 0             | --                     | --                   |                |                |               |               |                |
| Ireland, United Kingdom                              | 1        | 28.5%        | 25.0%      | 32.4%      | 0             | --                     | --                   |                |                |               |               |                |
| Israel                                               | 1        | 44.1%        | 36.0%      | 52.6%      | 0             | --                     | --                   |                |                |               |               |                |

|                                                          |    |       |       |       |     |      |       |         |       |    |  |  |
|----------------------------------------------------------|----|-------|-------|-------|-----|------|-------|---------|-------|----|--|--|
| Italy, Portugal, Spain                                   | 1  | 25.6% | 18.6% | 34.1% | 0   | --   | --    |         |       |    |  |  |
| Japan                                                    | 1  | 22.0% | 19.0% | 25.2% | 0   | --   | --    |         |       |    |  |  |
| Kuwait                                                   | 1  | 40.0% | 33.4% | 46.9% | 0   | --   | --    |         |       |    |  |  |
| Lithuania                                                | 1  | 34.1% | 28.1% | 40.6% | 0   | --   | --    |         |       |    |  |  |
| New Zealand                                              | 3  | 31.5% | 27.8% | 35.5% | 1   | 0    | 0%    |         |       |    |  |  |
| Peru                                                     | 1  | 14.2% | 12.8% | 15.7% | 0   | --   | --    |         |       |    |  |  |
| Portugal                                                 | 1  | 25.3% | 19.0% | 32.9% | 0   | --   | --    |         |       |    |  |  |
| Serbia                                                   | 2  | 54.8% | 49.3% | 60.1% | 1   | 0    | 0%    |         |       |    |  |  |
| Spain                                                    | 5  | 39.3% | 35.6% | 43.2% | 5   | 0.01 | 25.5% |         |       |    |  |  |
| Switzerland                                              | 2  | 25.4% | 13.9% | 41.7% | 36  | 0.28 | 97.2% |         |       |    |  |  |
| United Kingdom                                           | 1  | 41.0% | 38.3% | 43.7% | 0   | --   | --    |         |       |    |  |  |
| United States                                            | 16 | 35.7% | 31.2% | 40.5% | 477 | 0.14 | 96.9% |         |       |    |  |  |
| Yemen                                                    | 1  | 63.2% | 59.2% | 67.1% | 0   | --   | --    |         |       |    |  |  |
| <b>Continent</b>                                         |    |       |       |       |     |      |       |         |       |    |  |  |
| Asia                                                     | 3  | 34.8% | 18.4% | 55.7% | 66  | 0.56 | 97.0% | 0.06    | 10.4  | 5  |  |  |
| Europe                                                   | 20 | 32.1% | 27.3% | 37.2% | 511 | 0.25 | 96.3% |         |       |    |  |  |
| Middle East                                              | 4  | 47.9% | 34.7% | 61.4% | 44  | 0.29 | 93.1% |         |       |    |  |  |
| North America                                            | 18 | 36.3% | 32.0% | 40.9% | 479 | 0.14 | 96.4% |         |       |    |  |  |
| Oceania                                                  | 5  | 30.2% | 27.2% | 33.5% | 3   | 0    | 0.0%  |         |       |    |  |  |
| South America                                            | 7  | 37.0% | 21.4% | 55.9% | 333 | 1.03 | 98.2% |         |       |    |  |  |
| <b>Specialty</b>                                         |    |       |       |       |     |      |       |         |       |    |  |  |
| Anesthesia                                               | 2  | 39.3% | 17.0% | 67.1% | 10  | 0.62 | 89.7% | <0.0001 | 555.3 | 30 |  |  |
| Anesthesia, Intensive Care                               | 1  | 34.1% | 28.1% | 40.6% | 0   | --   | --    |         |       |    |  |  |
| Emergency Medicine                                       | 2  | 37.8% | 33.0% | 42.9% | 1   | 0    | 6.5%  |         |       |    |  |  |
| ENT                                                      | 3  | 22.7% | 19.3% | 26.5% | 1   | 0    | 0%    |         |       |    |  |  |
| Family Medicine                                          | 1  | 42.4% | 34.1% | 51.2% | 0   | --   | --    |         |       |    |  |  |
| Family Medicine, General Practice                        | 1  | 40.0% | 33.4% | 46.9% | 0   | --   | --    |         |       |    |  |  |
| Gastroenterology, Oncology, Radiology, Surgical Oncology | 1  | 41.0% | 38.3% | 43.7% | 0   | --   | --    |         |       |    |  |  |
| General and Subspecialty Internal Medicine               | 1  | 30.2% | 26.2% | 34.6% | 0   | --   | --    |         |       |    |  |  |
| General Practice                                         | 3  | 17.9% | 9.8%  | 30.4% | 23  | 0    | 91%   |         |       |    |  |  |
| General Practice, Oncology, Pediatrics                   | 1  | 33.3% | 28.7% | 38.3% | 0   | --   | --    |         |       |    |  |  |
| General Practice, Psychiatry                             | 1  | 58.3% | 49.3% | 66.8% | 0   | --   | --    |         |       |    |  |  |
| Headache Medicine                                        | 1  | 52.8% | 44.1% | 61.3% | 0   | --   | --    |         |       |    |  |  |
| Intensive Care                                           | 2  | 46.4% | 41.4% | 51.6% | 1   | 0    | 0%    |         |       |    |  |  |
| Multiple Palliative Care-Related Specialties             | 1  | 22.5% | 12.1% | 37.9% | 0   | --   | --    |         |       |    |  |  |



|                                                         |          |              |            |            |               |                        |                      |                |                |               |               |                |
|---------------------------------------------------------|----------|--------------|------------|------------|---------------|------------------------|----------------------|----------------|----------------|---------------|---------------|----------------|
| Multiple Specialties                                    | 11       | 36.3%        | 28.7%      | 44.6%      | 1092          | 0.33                   | 99.1%                |                |                |               |               |                |
| Multiple Surgical Specialties                           | 1        | 31.7%        | 28.1%      | 35.6%      | 0             | --                     | --                   |                |                |               |               |                |
| Neurology                                               | 1        | 53.4%        | 51.0%      | 55.9%      | 0             | --                     | --                   |                |                |               |               |                |
| Neurosurgery                                            | 1        | 14.1%        | 8.0%       | 23.7%      | 0             | --                     | --                   |                |                |               |               |                |
| Obstetrics and Gynecology                               | 1        | 52.4%        | 31.8%      | 72.2%      | 0             | --                     | --                   |                |                |               |               |                |
| Occupational Medicine                                   | 1        | 34.3%        | 31.9%      | 36.8%      | 0             | --                     | --                   |                |                |               |               |                |
| Oncology                                                | 2        | 32.3%        | 21.2%      | 45.9%      | 7             | 0.15                   | 86.3%                |                |                |               |               |                |
| Oncology, Palliative Care                               | 1        | 22.0%        | 19.0%      | 25.2%      | 0             | --                     | --                   |                |                |               |               |                |
| Orthopedic Surgery                                      | 2        | 41.0%        | 34.5%      | 47.9%      | 0             | 0                      | 0%                   |                |                |               |               |                |
| Palliative Care                                         | 1        | 60.1%        | 56.4%      | 63.7%      | 0             | --                     | --                   |                |                |               |               |                |
| Pediatrics                                              | 3        | 34.4%        | 17.3%      | 57.0%      | 29            | 0.62                   | 93.0%                |                |                |               |               |                |
| Primary Care                                            | 6        | 34.6%        | 23.2%      | 48.1%      | 140           | 0.47                   | 96.4%                |                |                |               |               |                |
| Psychiatry                                              | 1        | 33.1%        | 27.4%      | 39.3%      | 0             | --                     | --                   |                |                |               |               |                |
| Radiation Oncology                                      | 1        | 28.2%        | 22.6%      | 34.5%      | 0             | --                     | --                   |                |                |               |               |                |
| Surgery                                                 | 1        | 33.3%        | 15.8%      | 57.1%      | 0             | --                     | --                   |                |                |               |               |                |
| Surgical Oncology                                       | 1        | 41.4%        | 30.5%      | 53.2%      | 0             | --                     | --                   |                |                |               |               |                |
| Urology                                                 | 1        | 28.5%        | 25.0%      | 32.4%      | 0             | --                     | --                   |                |                |               |               |                |
|                                                         |          |              |            |            |               |                        |                      |                |                |               |               |                |
|                                                         |          |              |            |            |               |                        |                      |                |                |               |               |                |
| <b>Meta-regression Results</b>                          |          |              |            |            |               |                        |                      |                |                |               |               |                |
| <b>Baseline Year (Range)</b>                            | <b>k</b> | <b>Slope</b> | <b>SE</b>  | <b>Z</b>   | <b>P(mod)</b> | <b>LCI</b>             | <b>UCI</b>           | <b>Q(mod)</b>  | <b>df(mod)</b> | <b>P(het)</b> | <b>Q(het)</b> | <b>df(het)</b> |
| 2000-2017                                               | 42       | 0.5%         | 0.5%       | 1.1        | 0.28          | -0.4%                  | 1.4%                 | 1.2            | 1              | <0.0001       | 2839          | 40             |
| <b>Average Age (Range)</b>                              |          |              |            |            |               |                        |                      |                |                |               |               |                |
| 32.8-56.0                                               | 37       | -0.5%        | 0.3%       | -1.9       | 0.06          | -1.0%                  | 0.03%                | 3.4            | 1              | <0.0001       | 1284          | 35             |
| <b>Proportion of Male Participants (Range)</b>          |          |              |            |            |               |                        |                      |                |                |               |               |                |
| 0-97%                                                   | 51       | -19.4%       | 7.3%       | -2.7       | 0.01          | -33.6%                 | -5.1%                | 7.1            | 1              | <0.0001       | 2779          | 49             |
|                                                         |          |              |            |            |               |                        |                      |                |                |               |               |                |
|                                                         |          |              |            |            |               |                        |                      |                |                |               |               |                |
| <b>C. Emotional Exhaustion defined by MBI-EE "High"</b> |          |              |            |            |               |                        |                      |                |                |               |               |                |
| <b>Stratified Meta-analysis Results</b>                 |          |              |            |            |               |                        |                      |                |                |               |               |                |
| <b>United States vs. Not</b>                            | <b>k</b> | <b>Prev.</b> | <b>LCI</b> | <b>UCI</b> | <b>Q</b>      | <b>tau<sup>2</sup></b> | <b>I<sup>2</sup></b> | <b>P(diff)</b> | <b>Q(diff)</b> | <b>df</b>     |               |                |
| Not United States                                       | 14       | 39.2%        | 32.8%      | 46.0%      | 107           | 0.23                   | 87.9%                | 0.45           | 0.6            | 1             |               |                |
| United States                                           | 8        | 35.3%        | 28.2%      | 43.2%      | 73            | 0.20                   | 90.5%                |                |                |               |               |                |
| <b>Country</b>                                          |          |              |            |            |               |                        |                      |                |                |               |               |                |
| Australia                                               | 2        | 28.5%        | 21.1%      | 37.2%      | 1             | 0                      | 0%                   | <0.0001        | 82.7           | 10            |               |                |
| Canada                                                  | 2        | 42.0%        | 33.2%      | 51.3%      | 1             | 0.02                   | 16.9%                |                |                |               |               |                |
| Canada, United States                                   | 1        | 46.2%        | 35.5%      | 57.2%      | 0             | --                     | --                   |                |                |               |               |                |

|                                      |          |              |           |          |               |            |            |               |                |               |               |                |
|--------------------------------------|----------|--------------|-----------|----------|---------------|------------|------------|---------------|----------------|---------------|---------------|----------------|
| Germany                              | 1        | 37.3%        | 25.2%     | 51.2%    | 0             | --         | --         |               |                |               |               |                |
| Palestine                            | 1        | 72.3%        | 64.4%     | 79.1%    | 0             | --         | --         |               |                |               |               |                |
| Poland                               | 1        | 33.3%        | 21.5%     | 47.7%    | 0             | --         | --         |               |                |               |               |                |
| Saudi Arabia                         | 1        | 50.7%        | 39.1%     | 62.3%    | 0             | --         | --         |               |                |               |               |                |
| Serbia                               | 1        | 32.4%        | 26.4%     | 39.0%    | 0             | --         | --         |               |                |               |               |                |
| Spain                                | 2        | 29.1%        | 23.7%     | 35.1%    | 0             | 0          | 0%         |               |                |               |               |                |
| United Kingdom                       | 2        | 38.8%        | 25.7%     | 53.7%    | 23            | 0.18       | 95.7%      |               |                |               |               |                |
| United States                        | 8        | 35.3%        | 28.2%     | 43.2%    | 73            | 0.20       | 90.5%      |               |                |               |               |                |
| <b>Continent</b>                     |          |              |           |          |               |            |            |               |                |               |               |                |
| Asia                                 | 1        | 50.7%        | 39.1%     | 62.3%    | 0             | --         | --         | <0.0001       | 64.7           | 4             |               |                |
| Europe                               | 7        | 34.3%        | 28.2%     | 40.8%    | 35            | 0.11       | 82.9%      |               |                |               |               |                |
| Middle East                          | 1        | 72.3%        | 64.4%     | 79.1%    | 0             | --         | --         |               |                |               |               |                |
| North America                        | 11       | 37.1%        | 30.9%     | 43.7%    | 81            | 0.18       | 87.6%      |               |                |               |               |                |
| Oceania                              | 2        | 28.5%        | 21.1%     | 37.2%    | 1             | 0          | 0%         |               |                |               |               |                |
| <b>Specialty</b>                     |          |              |           |          |               |            |            |               |                |               |               |                |
| Colorectal Surgery, Vascular Surgery | 1        | 31.7%        | 27.7%     | 36.0%    | 0             | --         | --         | <0.0001       | 88.9           | 16            |               |                |
| Emergency Medicine                   | 2        | 46.8%        | 9.1%      | 88.5%    | 34            | 2.38       | 97.1%      |               |                |               |               |                |
| General Practice                     | 4        | 32.8%        | 22.6%     | 44.9%    | 28            | 0.24       | 89.4%      |               |                |               |               |                |
| Gynecologic Oncology                 | 2        | 34.9%        | 24.2%     | 47.4%    | 0             | 0          | 0%         |               |                |               |               |                |
| Internal Medicine                    | 1        | 46.2%        | 35.5%     | 57.2%    | 0             | --         | --         |               |                |               |               |                |
| Multiple Specialties                 | 1        | 33.3%        | 21.5%     | 47.7%    | 0             | --         | --         |               |                |               |               |                |
| Obstetrics and Gynecology            | 1        | 30.1%        | 25.6%     | 35.0%    | 0             | --         | --         |               |                |               |               |                |
| Ophthalmology                        | 1        | 44.7%        | 36.2%     | 53.6%    | 0             | --         | --         |               |                |               |               |                |
| Orthopedic Surgery                   | 1        | 50.7%        | 39.1%     | 62.3%    | 0             | --         | --         |               |                |               |               |                |
| Pain Medicine                        | 1        | 60.4%        | 53.6%     | 66.8%    | 0             | --         | --         |               |                |               |               |                |
| Pediatric Critical Care              | 1        | 34.4%        | 28.8%     | 40.5%    | 0             | --         | --         |               |                |               |               |                |
| Plastic Surgery                      | 1        | 28.9%        | 25.1%     | 33.0%    | 0             | --         | --         |               |                |               |               |                |
| Primary Care                         | 1        | 32.4%        | 26.4%     | 39.0%    | 0             | --         | --         |               |                |               |               |                |
| Radiation Oncology                   | 1        | 27.7%        | 16.8%     | 42.0%    | 0             | --         | --         |               |                |               |               |                |
| Surgery                              | 1        | 40.1%        | 33.8%     | 46.8%    | 0             | --         | --         |               |                |               |               |                |
| Transplant Surgery                   | 1        | 37.3%        | 31.0%     | 44.1%    | 0             | --         | --         |               |                |               |               |                |
| Urology                              | 1        | 37.3%        | 25.2%     | 51.2%    | 0             | --         | --         |               |                |               |               |                |
|                                      |          |              |           |          |               |            |            |               |                |               |               |                |
|                                      |          |              |           |          |               |            |            |               |                |               |               |                |
| <b>Meta-regression Results</b>       |          |              |           |          |               |            |            |               |                |               |               |                |
| <b>Baseline Year (Range)</b>         | <b>k</b> | <b>Slope</b> | <b>SE</b> | <b>Z</b> | <b>P(mod)</b> | <b>LCI</b> | <b>UCI</b> | <b>Q(mod)</b> | <b>df(mod)</b> | <b>P(het)</b> | <b>Q(het)</b> | <b>df(het)</b> |

|                                                   |          |              |            |            |          |                        |                      |                |                |           |     |    |
|---------------------------------------------------|----------|--------------|------------|------------|----------|------------------------|----------------------|----------------|----------------|-----------|-----|----|
| 2002-2016                                         | 16       | -0.4%        | 0.9%       | -0.4       | 0.66     | -2.0%                  | 1.3%                 | 0.2            | 1              | <0.0001   | 183 | 14 |
| <b>Average Age (Range)</b>                        |          |              |            |            |          |                        |                      |                |                |           |     |    |
| 43.0-50.3                                         | 11       | -0.7%        | 1.7%       | -0.4       | 0.69     | -4.0%                  | 2.7%                 | 0.2            | 1              | <0.0001   | 78  | 9  |
| <b>Proportion of Male Participants (Range)</b>    |          |              |            |            |          |                        |                      |                |                |           |     |    |
| 17-94%                                            | 15       | 16.9%        | 11.2%      | 1.5        | 0.13     | -5.1%                  | 38.9%                | 2.3            | 1              | <0.0001   | 101 | 13 |
|                                                   |          |              |            |            |          |                        |                      |                |                |           |     |    |
| <b>D. Depersonalization defined by MBI-DP ≥10</b> |          |              |            |            |          |                        |                      |                |                |           |     |    |
| <b>Stratified Meta-analysis Results</b>           |          |              |            |            |          |                        |                      |                |                |           |     |    |
| <b>United States vs. Not</b>                      | <b>k</b> | <b>Prev.</b> | <b>LCI</b> | <b>UCI</b> | <b>Q</b> | <b>tau<sup>2</sup></b> | <b>I<sup>2</sup></b> | <b>P(diff)</b> | <b>Q(diff)</b> | <b>df</b> |     |    |
| Not United States                                 | 31       | 26.4%        | 21.8%      | 31.7%      | 1004     | 0.47                   | 97.0%                | 0.58           | 0.3            | 1         |     |    |
| United States                                     | 10       | 24.6%        | 20.7%      | 29.0%      | 257      | 0.10                   | 96.5%                |                |                |           |     |    |
| <b>Country</b>                                    |          |              |            |            |          |                        |                      |                |                |           |     |    |
| Armenia                                           | 1        | 51.2%        | 42.6%      | 59.7%      | 0        | --                     | --                   | <0.0001        | 876.8          | 21        |     |    |
| Australia                                         | 1        | 7.5%         | 2.4%       | 20.8%      | 0        | --                     | --                   |                |                |           |     |    |
| Australia, New Zealand                            | 1        | 19.1%        | 14.4%      | 24.8%      | 0        | --                     | --                   |                |                |           |     |    |
| Bosnia and Herzegovina                            | 1        | 45.6%        | 37.7%      | 53.7%      | 0        | --                     | --                   |                |                |           |     |    |
| Brazil                                            | 2        | 40.0%        | 31.3%      | 49.5%      | 1        | 0                      | 0%                   |                |                |           |     |    |
| Canada                                            | 2        | 45.4%        | 37.4%      | 53.7%      | 0        | 0                      | 0%                   |                |                |           |     |    |
| Croatia                                           | 1        | 16.0%        | 10.6%      | 23.5%      | 0        | --                     | --                   |                |                |           |     |    |
| Denmark                                           | 3        | 15.1%        | 13.4%      | 17.1%      | 3        | 0.004                  | 25.9%                |                |                |           |     |    |
| France                                            | 1        | 20.1%        | 18.1%      | 22.2%      | 0        | --                     | --                   |                |                |           |     |    |
| Germany                                           | 1        | 47.7%        | 45.4%      | 50.0%      | 0        | --                     | --                   |                |                |           |     |    |
| Iran                                              | 1        | 11.7%        | 6.2%       | 21.0%      | 0        | --                     | --                   |                |                |           |     |    |
| Israel                                            | 1        | 36.0%        | 28.4%      | 44.4%      | 0        | --                     | --                   |                |                |           |     |    |
| Italy, Portugal, Spain                            | 1        | 22.3%        | 15.8%      | 30.6%      | 0        | --                     | --                   |                |                |           |     |    |
| Japan                                             | 1        | 11.1%        | 8.9%       | 13.6%      | 0        | --                     | --                   |                |                |           |     |    |
| Kuwait                                            | 1        | 45.5%        | 38.7%      | 52.4%      | 0        | --                     | --                   |                |                |           |     |    |
| New Zealand                                       | 2        | 24.9%        | 20.5%      | 30.0%      | 0        | 0                      | 0%                   |                |                |           |     |    |
| Peru                                              | 1        | 16.8%        | 15.3%      | 18.4%      | 0        | --                     | --                   |                |                |           |     |    |
| Portugal                                          | 1        | 16.0%        | 11.0%      | 22.8%      | 0        | --                     | --                   |                |                |           |     |    |
| Serbia                                            | 1        | 0.4%         | 0.03%      | 6.3%       | 0        | --                     | --                   |                |                |           |     |    |
| Spain                                             | 5        | 36.7%        | 27.0%      | 47.5%      | 38       | 0.22                   | 89.5%                |                |                |           |     |    |
| Switzerland                                       | 2        | 24.3%        | 19.2%      | 30.2%      | 6        | 0.04                   | 82.1%                |                |                |           |     |    |
| United States                                     | 10       | 24.6%        | 20.7%      | 29.0%      | 257      | 0.10                   | 96.5%                |                |                |           |     |    |
| <b>Continent</b>                                  |          |              |            |            |          |                        |                      |                |                |           |     |    |

|                                              |          |              |           |          |               |            |            |               |                |               |               |                |
|----------------------------------------------|----------|--------------|-----------|----------|---------------|------------|------------|---------------|----------------|---------------|---------------|----------------|
| Asia                                         | 2        | 26.4%        | 4.3%      | 74.4%    | 100           | 2.25       | 99.0%      | 0.78          | 2.5            | 5             |               |                |
| Europe                                       | 17       | 25.4%        | 19.4%     | 32.4%    | 673           | 0.48       | 97.6%      |               |                |               |               |                |
| Middle East                                  | 3        | 29.8%        | 16.1%     | 48.5%    | 24            | 0.44       | 91.5%      |               |                |               |               |                |
| North America                                | 12       | 26.6%        | 22.7%     | 31.0%    | 269           | 0.10       | 95.9%      |               |                |               |               |                |
| Oceania                                      | 4        | 21.2%        | 15.7%     | 28.0%    | 7             | 0.07       | 58.8%      |               |                |               |               |                |
| South America                                | 3        | 30.7%        | 14.5%     | 53.7%    | 35            | 0.67       | 94.3%      |               |                |               |               |                |
| <b>Specialty</b>                             |          |              |           |          |               |            |            |               |                |               |               |                |
| Allergy and Immunology                       | 1        | 28.5%        | 24.3%     | 33.1%    | 0             | --         | --         | <0.0001       | 447.8          | 23            |               |                |
| Anesthesia                                   | 1        | 44.2%        | 30.3%     | 59.1%    | 0             | --         | --         |               |                |               |               |                |
| Emergency Medicine                           | 1        | 11.7%        | 6.2%      | 21.0%    | 0             | --         | --         |               |                |               |               |                |
| ENT                                          | 2        | 18.7%        | 15.4%     | 22.5%    | 0             | 0          | 0%         |               |                |               |               |                |
| Family Medicine                              | 1        | 16.0%        | 10.6%     | 23.5%    | 0             | --         | --         |               |                |               |               |                |
| Family Medicine, General Practice            | 1        | 45.5%        | 38.7%     | 52.4%    | 0             | --         | --         |               |                |               |               |                |
| General and Subspecialty Internal Medicine   | 1        | 13.3%        | 10.5%     | 16.8%    | 0             | --         | --         |               |                |               |               |                |
| General Practice                             | 3        | 17.8%        | 12.9%     | 24.0%    | 8             | 0.08       | 74.5%      |               |                |               |               |                |
| General Practice, Oncology, Pediatrics       | 1        | 27.6%        | 23.3%     | 32.3%    | 0             | --         | --         |               |                |               |               |                |
| General Practice, Psychiatry                 | 1        | 0.4%         | 0.03%     | 6.3%     | 0             | --         | --         |               |                |               |               |                |
| Intensive Care                               | 1        | 37.3%        | 26.6%     | 49.4%    | 0             | --         | --         |               |                |               |               |                |
| Multiple Palliative Care-Related Specialties | 1        | 7.5%         | 2.4%      | 20.8%    | 0             | --         | --         |               |                |               |               |                |
| Multiple Specialties                         | 9        | 33.3%        | 26.5%     | 40.7%    | 667           | 0.23       | 98.8%      |               |                |               |               |                |
| Neurology                                    | 1        | 41.4%        | 39.0%     | 43.9%    | 0             | --         | --         |               |                |               |               |                |
| Neurosurgery                                 | 1        | 27.2%        | 18.6%     | 37.8%    | 0             | --         | --         |               |                |               |               |                |
| Obstetrics and Gynecology                    | 1        | 33.3%        | 16.8%     | 55.3%    | 0             | --         | --         |               |                |               |               |                |
| Occupational Medicine                        | 1        | 20.1%        | 18.1%     | 22.2%    | 0             | --         | --         |               |                |               |               |                |
| Oncology                                     | 2        | 24.6%        | 22.2%     | 27.1%    | 0             | 0          | 0%         |               |                |               |               |                |
| Oncology, Palliative Care                    | 1        | 11.1%        | 8.9%      | 13.6%    | 0             | --         | --         |               |                |               |               |                |
| Orthopedic Surgery                           | 1        | 25.0%        | 8.3%      | 55.2%    | 0             | --         | --         |               |                |               |               |                |
| Pediatrics                                   | 1        | 13.1%        | 8.4%      | 19.9%    | 0             | --         | --         |               |                |               |               |                |
| Primary Care                                 | 6        | 30.6%        | 22.3%     | 40.4%    | 76            | 0.26       | 93.4%      |               |                |               |               |                |
| Radiation Oncology                           | 1        | 19.1%        | 14.4%     | 24.8%    | 0             | --         | --         |               |                |               |               |                |
| Surgery                                      | 1        | 38.9%        | 19.8%     | 62.1%    | 0             | --         | --         |               |                |               |               |                |
|                                              |          |              |           |          |               |            |            |               |                |               |               |                |
|                                              |          |              |           |          |               |            |            |               |                |               |               |                |
| <b>Meta-regression Results</b>               |          |              |           |          |               |            |            |               |                |               |               |                |
| <b>Baseline Year (Range)</b>                 | <b>k</b> | <b>Slope</b> | <b>SE</b> | <b>Z</b> | <b>P(mod)</b> | <b>LCI</b> | <b>UCI</b> | <b>Q(mod)</b> | <b>df(mod)</b> | <b>P(het)</b> | <b>Q(het)</b> | <b>df(het)</b> |
| 2000-2016                                    | 31       | 0.7%         | 0.5%      | 1.3      | 0.20          | -0.4%      | 1.8%       | 2             | 1              | <0.0001       | 1322          | 29             |

|                                                   |          |              |            |            |          |                        |                      |                |                |           |      |    |
|---------------------------------------------------|----------|--------------|------------|------------|----------|------------------------|----------------------|----------------|----------------|-----------|------|----|
| <b>Average Age (Range)</b>                        |          |              |            |            |          |                        |                      |                |                |           |      |    |
| 32.8-56.0                                         | 28       | 0.03%        | 0.5%       | 0.1        | 0.95     | -0.9%                  | 1.0%                 | 0.004          | 1              | <0.0001   | 2506 | 26 |
| <b>Proportion of Male Participants (Range)</b>    |          |              |            |            |          |                        |                      |                |                |           |      |    |
| 0-97%                                             | 37       | -3.1%        | 9.6%       | -0.3       | 0.74     | -21.9%                 | 15.6%                | 0.1            | 1              | <0.0001   | 2711 | 35 |
| <b>E. Depersonalization defined by MBI-DP ≥13</b> |          |              |            |            |          |                        |                      |                |                |           |      |    |
| <b>Stratified Meta-analysis Results</b>           |          |              |            |            |          |                        |                      |                |                |           |      |    |
| <b>United States vs. Not</b>                      | <b>k</b> | <b>Prev.</b> | <b>LCI</b> | <b>UCI</b> | <b>Q</b> | <b>tau<sup>2</sup></b> | <b>I<sup>2</sup></b> | <b>P(diff)</b> | <b>Q(diff)</b> | <b>df</b> |      |    |
| Not United States                                 | 11       | 23.5%        | 18.2%      | 29.6%      | 131      | 0.26                   | 92.4%                | 0.34           | 0.9            | 1         |      |    |
| United States                                     | 6        | 19.6%        | 14.7%      | 25.7%      | 31       | 0.14                   | 84.1%                |                |                |           |      |    |
| <b>Country</b>                                    |          |              |            |            |          |                        |                      |                |                |           |      |    |
| Argentina                                         | 1        | 22.8%        | 16.2%      | 31.0%      | 0        | --                     | --                   | <0.0001        | 134.2          | 9         |      |    |
| Bosnia and Herzegovina                            | 1        | 21.3%        | 16.6%      | 27.0%      | 0        | --                     | --                   |                |                |           |      |    |
| Brazil                                            | 3        | 24.6%        | 21.5%      | 28.0%      | 0        | 0                      | 0%                   |                |                |           |      |    |
| China                                             | 1        | 53.1%        | 46.6%      | 59.5%      | 0        | --                     | --                   |                |                |           |      |    |
| Ireland, United Kingdom                           | 1        | 27.0%        | 23.5%      | 30.7%      | 0        | --                     | --                   |                |                |           |      |    |
| Lithuania                                         | 1        | 25.9%        | 20.6%      | 32.1%      | 0        | --                     | --                   |                |                |           |      |    |
| New Zealand                                       | 1        | 13.0%        | 9.3%       | 17.9%      | 0        | --                     | --                   |                |                |           |      |    |
| Serbia                                            | 1        | 12.2%        | 8.4%       | 17.4%      | 0        | --                     | --                   |                |                |           |      |    |
| United States                                     | 6        | 19.6%        | 14.7%      | 25.7%      | 31       | 0.14                   | 84.1%                |                |                |           |      |    |
| Yemen                                             | 1        | 19.4%        | 16.3%      | 22.8%      | 0        | --                     | --                   |                |                |           |      |    |
| <b>Continent</b>                                  |          |              |            |            |          |                        |                      |                |                |           |      |    |
| Asia                                              | 1        | 53.1%        | 46.6%      | 59.5%      | 0        | --                     | --                   | <0.0001        | 115.5          | 5         |      |    |
| Europe                                            | 4        | 21.4%        | 15.9%      | 28.2%      | 19       | 0.11                   | 84.1%                |                |                |           |      |    |
| Middle East                                       | 1        | 19.4%        | 16.3%      | 22.8%      | 0        | --                     | --                   |                |                |           |      |    |
| North America                                     | 6        | 19.6%        | 14.7%      | 25.7%      | 31       | 0.14                   | 84.1%                |                |                |           |      |    |
| Oceania                                           | 1        | 13.0%        | 9.3%       | 17.9%      | 0        | --                     | --                   |                |                |           |      |    |
| South America                                     | 4        | 24.3%        | 21.4%      | 27.4%      | 0        | 0                      | 0%                   |                |                |           |      |    |
| <b>Specialty</b>                                  |          |              |            |            |          |                        |                      |                |                |           |      |    |
| Anesthesia                                        | 1        | 12.2%        | 8.4%       | 17.4%      | 0        | --                     | --                   | <0.0001        | 67.8           | 13        |      |    |
| Anesthesia, Intensive Care                        | 1        | 25.9%        | 20.6%      | 32.1%      | 0        | --                     | --                   |                |                |           |      |    |
| ENT                                               | 1        | 21.7%        | 13.0%      | 33.8%      | 0        | --                     | --                   |                |                |           |      |    |
| Headache Medicine                                 | 1        | 21.3%        | 15.0%      | 29.2%      | 0        | --                     | --                   |                |                |           |      |    |
| Intensive Care                                    | 1        | 24.6%        | 20.0%      | 29.8%      | 0        | --                     | --                   |                |                |           |      |    |
| Multiple Specialties                              | 3        | 30.8%        | 15.0%      | 52.9%      | 86       | 0.65                   | 97.7%                |                |                |           |      |    |

|                                                      |          |              |            |            |               |                        |                      |                |                |               |               |                |
|------------------------------------------------------|----------|--------------|------------|------------|---------------|------------------------|----------------------|----------------|----------------|---------------|---------------|----------------|
| Multiple Surgical Specialties                        | 1        | 13.3%        | 10.8%      | 16.4%      | 0             | --                     | --                   |                |                |               |               |                |
| Orthopedic Surgery                                   | 1        | 26.9%        | 21.2%      | 33.6%      | 0             | --                     | --                   |                |                |               |               |                |
| Palliative Care                                      | 1        | 24.0%        | 21.0%      | 27.4%      | 0             | --                     | --                   |                |                |               |               |                |
| Pediatrics                                           | 2        | 23.3%        | 17.9%      | 29.8%      | 0             | 0                      | 0%                   |                |                |               |               |                |
| Primary Care                                         | 1        | 21.3%        | 16.6%      | 27.0%      | 0             | --                     | --                   |                |                |               |               |                |
| Psychiatry                                           | 1        | 13.0%        | 9.3%       | 17.9%      | 0             | --                     | --                   |                |                |               |               |                |
| Surgical Oncology                                    | 1        | 11.3%        | 5.7%       | 21.0%      | 0             | --                     | --                   |                |                |               |               |                |
| Urology                                              | 1        | 27.0%        | 23.5%      | 30.7%      | 0             | --                     | --                   |                |                |               |               |                |
|                                                      |          |              |            |            |               |                        |                      |                |                |               |               |                |
|                                                      |          |              |            |            |               |                        |                      |                |                |               |               |                |
| <b>Meta-regression Results</b>                       |          |              |            |            |               |                        |                      |                |                |               |               |                |
| <b>Baseline Year (Range)</b>                         | <b>k</b> | <b>Slope</b> | <b>SE</b>  | <b>Z</b>   | <b>P(mod)</b> | <b>LCI</b>             | <b>UCI</b>           | <b>Q(mod)</b>  | <b>df(mod)</b> | <b>P(het)</b> | <b>Q(het)</b> | <b>df(het)</b> |
| 2006-2017                                            | 12       | -0.1%        | 0.9%       | -0.1       | 0.90          | -1.8%                  | 1.6%                 | 0.02           | 1              | <0.0001       | 26            | 10             |
| <b>Average Age (Range)</b>                           |          |              |            |            |               |                        |                      |                |                |               |               |                |
| 33.3-53.7                                            | 10       | -0.5%        | 0.5%       | -1.0       | 0.34          | -1.5%                  | 0.5%                 | 0.9            | 1              | <0.0001       | 119           | 8              |
| <b>Proportion of Male Participants (Range)</b>       |          |              |            |            |               |                        |                      |                |                |               |               |                |
| 17-94%                                               | 14       | 3.0%         | 11.0%      | 0.3        | 0.78          | -18.6%                 | 24.7%                | 0.1            | 1              | <0.0001       | 170           | 12             |
|                                                      |          |              |            |            |               |                        |                      |                |                |               |               |                |
|                                                      |          |              |            |            |               |                        |                      |                |                |               |               |                |
| <b>F. Depersonalization defined by MBI-DP "High"</b> |          |              |            |            |               |                        |                      |                |                |               |               |                |
| <b>Stratified Meta-analysis Results</b>              |          |              |            |            |               |                        |                      |                |                |               |               |                |
| <b>United States vs. Not</b>                         | <b>k</b> | <b>Prev.</b> | <b>LCI</b> | <b>UCI</b> | <b>Q</b>      | <b>tau<sup>2</sup></b> | <b>I<sup>2</sup></b> | <b>P(diff)</b> | <b>Q(diff)</b> | <b>df</b>     |               |                |
| Not United States                                    | 13       | 28.3%        | 21.6%      | 36.1%      | 134           | 0.37                   | 91.1%                | 0.15           | 2.1            | 1             |               |                |
| United States                                        | 8        | 21.0%        | 15.1%      | 28.4%      | 75            | 0.29                   | 90.6%                |                |                |               |               |                |
| <b>Country</b>                                       |          |              |            |            |               |                        |                      |                |                |               |               |                |
| Australia                                            | 1        | 10.7%        | 3.5%       | 28.4%      | 0             | --                     | --                   | <0.0001        | 71.6           | 10            |               |                |
| Canada                                               | 2        | 26.6%        | 8.4%       | 59.0%      | 7             | 0.87                   | 86.6%                |                |                |               |               |                |
| Canada, United States                                | 1        | 41.3%        | 30.8%      | 52.7%      | 0             | --                     | --                   |                |                |               |               |                |
| Germany                                              | 1        | 27.5%        | 17.0%      | 41.2%      | 0             | --                     | --                   |                |                |               |               |                |
| Palestine                                            | 1        | 32.1%        | 24.9%      | 40.3%      | 0             | --                     | --                   |                |                |               |               |                |
| Poland                                               | 1        | 35.4%        | 23.3%      | 49.8%      | 0             | --                     | --                   |                |                |               |               |                |
| Saudi Arabia                                         | 1        | 59.4%        | 47.5%      | 70.3%      | 0             | --                     | --                   |                |                |               |               |                |
| Serbia                                               | 1        | 14.9%        | 10.7%      | 20.4%      | 0             | --                     | --                   |                |                |               |               |                |
| Spain                                                | 2        | 18.9%        | 14.4%      | 24.3%      | 0             | 0                      | 0%                   |                |                |               |               |                |
| United Kingdom                                       | 2        | 30.7%        | 14.4%      | 53.9%      | 50            | 0.48                   | 98.0%                |                |                |               |               |                |
| United States                                        | 8        | 21.0%        | 15.1%      | 28.4%      | 75            | 0.29                   | 90.6%                |                |                |               |               |                |
| <b>Continent</b>                                     |          |              |            |            |               |                        |                      |                |                |               |               |                |

|                                                                      |          |              |            |            |               |                        |                      |                |                |               |               |                |
|----------------------------------------------------------------------|----------|--------------|------------|------------|---------------|------------------------|----------------------|----------------|----------------|---------------|---------------|----------------|
| Asia                                                                 | 1        | 59.4%        | 47.5%      | 70.3%      | 0             | --                     | --                   | <0.0001        | 33.2           | 4             |               |                |
| Europe                                                               | 7        | 24.5%        | 16.5%      | 34.8%      | 91            | 0.40                   | 93.4%                |                |                |               |               |                |
| Middle East                                                          | 1        | 32.1%        | 24.9%      | 40.3%      | 0             | --                     | --                   |                |                |               |               |                |
| North America                                                        | 11       | 23.6%        | 17.4%      | 31.2%      | 115           | 0.36                   | 91.3%                |                |                |               |               |                |
| Oceania                                                              | 1        | 10.7%        | 3.5%       | 28.4%      | 0             | --                     | --                   |                |                |               |               |                |
| <b>Specialty</b>                                                     |          |              |            |            |               |                        |                      |                |                |               |               |                |
| Colorectal Surgery, Vascular Surgery                                 | 1        | 21.2%        | 17.8%      | 25.1%      | 0             | --                     | --                   | <0.0001        | 176.8          | 16            |               |                |
| Emergency Medicine                                                   | 2        | 34.1%        | 27.7%      | 41.0%      | 1             | 0                      | 0%                   |                |                |               |               |                |
| General Practice                                                     | 3        | 25.8%        | 12.5%      | 45.7%      | 38            | 0.57                   | 94.7%                |                |                |               |               |                |
| Gynecologic Oncology                                                 | 2        | 12.8%        | 6.5%       | 23.6%      | 0             | 0                      | 0%                   |                |                |               |               |                |
| Internal Medicine                                                    | 1        | 41.3%        | 30.8%      | 52.7%      | 0             | --                     | --                   |                |                |               |               |                |
| Multiple Specialties                                                 | 1        | 35.4%        | 23.3%      | 49.8%      | 0             | --                     | --                   |                |                |               |               |                |
| Obstetrics and Gynecology                                            | 1        | 10.0%        | 7.4%       | 13.5%      | 0             | --                     | --                   |                |                |               |               |                |
| Ophthalmology                                                        | 1        | 40.7%        | 32.3%      | 49.5%      | 0             | --                     | --                   |                |                |               |               |                |
| Orthopedic Surgery                                                   | 1        | 59.4%        | 47.5%      | 70.3%      | 0             | --                     | --                   |                |                |               |               |                |
| Pain Medicine                                                        | 1        | 35.8%        | 29.5%      | 42.5%      | 0             | --                     | --                   |                |                |               |               |                |
| Pediatric Critical Care                                              | 1        | 19.8%        | 15.4%      | 25.2%      | 0             | --                     | --                   |                |                |               |               |                |
| Plastic Surgery                                                      | 1        | 16.2%        | 13.3%      | 19.7%      | 0             | --                     | --                   |                |                |               |               |                |
| Primary Care                                                         | 1        | 14.9%        | 10.7%      | 0.2041     | 0             | --                     | --                   |                |                |               |               |                |
| Radiation Oncology                                                   | 1        | 14.9%        | 7.3%       | 28.1%      | 0             | --                     | --                   |                |                |               |               |                |
| Surgery                                                              | 1        | 17.1%        | 12.6%      | 22.7%      | 0             | --                     | --                   |                |                |               |               |                |
| Transplant Surgery                                                   | 1        | 26.3%        | 20.8%      | 32.7%      | 0             | --                     | --                   |                |                |               |               |                |
| Urology                                                              | 1        | 27.5%        | 17.0%      | 41.2%      | 0             | --                     | --                   |                |                |               |               |                |
|                                                                      |          |              |            |            |               |                        |                      |                |                |               |               |                |
|                                                                      |          |              |            |            |               |                        |                      |                |                |               |               |                |
| <b>Meta-regression Results</b>                                       |          |              |            |            |               |                        |                      |                |                |               |               |                |
| <b>Baseline Year (Range)</b>                                         | <b>k</b> | <b>Slope</b> | <b>SE</b>  | <b>Z</b>   | <b>P(mod)</b> | <b>LCI</b>             | <b>UCI</b>           | <b>Q(mod)</b>  | <b>df(mod)</b> | <b>P(het)</b> | <b>Q(het)</b> | <b>df(het)</b> |
| 2002-2016                                                            | 15       | -1.0%        | 0.8%       | -1.3       | 0.18          | -2.5%                  | 0.5%                 | 1.78           | 1              | <0.0001       | 134           | 13             |
| <b>Average Age (Range)</b>                                           |          |              |            |            |               |                        |                      |                |                |               |               |                |
| 43.0-50.3                                                            | 11       | -3.0%        | 2.2%       | -1.4       | 0.17          | -7.4%                  | 1.3%                 | 1.89           | 1              | <0.0001       | 147           | 9              |
| <b>Proportion of Male Participants (Range)</b>                       |          |              |            |            |               |                        |                      |                |                |               |               |                |
| 17-94%                                                               | 14       | 10.9%        | 14.5%      | 0.8        | 0.45          | -17.4%                 | 39.3%                | 0.6            | 1              | <0.0001       | 209           | 12             |
|                                                                      |          |              |            |            |               |                        |                      |                |                |               |               |                |
| <b>G. Diminished Personal Accomplishment defined by MBI-PA "Low"</b> |          |              |            |            |               |                        |                      |                |                |               |               |                |
| <b>Stratified Meta-analysis Results</b>                              |          |              |            |            |               |                        |                      |                |                |               |               |                |
| <b>United States vs. Not</b>                                         | <b>k</b> | <b>Prev.</b> | <b>LCI</b> | <b>UCI</b> | <b>Q</b>      | <b>tau<sup>2</sup></b> | <b>I<sup>2</sup></b> | <b>P(diff)</b> | <b>Q(diff)</b> | <b>df</b>     |               |                |

|                                      |    |       |       |       |     |      |       |         |       |    |  |  |
|--------------------------------------|----|-------|-------|-------|-----|------|-------|---------|-------|----|--|--|
| Not United States                    | 12 | 18.9% | 14.2% | 24.7% | 84  | 0.26 | 86.9% | 0.79    | 0.1   | 1  |  |  |
| United States                        | 8  | 17.4% | 9.8%  | 28.9% | 171 | 0.85 | 95.9% |         |       |    |  |  |
| <b>Country</b>                       |    |       |       |       |     |      |       |         |       |    |  |  |
| Australia                            | 1  | 3.7%  | 0.5%  | 22.1% | 0   | --   | --    | <0.0001 | 66.4  | 9  |  |  |
| Canada                               | 2  | 26.5% | 20.2% | 33.9% | 1   | 0    | 0%    |         |       |    |  |  |
| Canada, United States                | 1  | 4.1%  | 1.3%  | 11.8% | 0   | --   | --    |         |       |    |  |  |
| Germany                              | 1  | 9.8%  | 4.1%  | 21.5% | 0   | --   | --    |         |       |    |  |  |
| Palestine                            | 1  | 32.1% | 24.9% | 40.3% | 0   | --   | --    |         |       |    |  |  |
| Saudi Arabia                         | 1  | 17.4% | 10.2% | 28.2% | 0   | --   | --    |         |       |    |  |  |
| Serbia                               | 1  | 16.7% | 12.2% | 22.3% | 0   | --   | --    |         |       |    |  |  |
| Spain                                | 2  | 11.1% | 7.7%  | 15.7% | 0   | 0    | 0%    |         |       |    |  |  |
| United Kingdom                       | 2  | 31.3% | 26.7% | 36.3% | 3   | 0.02 | 65.3% |         |       |    |  |  |
| United States                        | 8  | 17.4% | 9.8%  | 28.9% | 171 | 0.85 | 95.9% |         |       |    |  |  |
| <b>Continent</b>                     |    |       |       |       |     |      |       |         |       |    |  |  |
| Asia                                 | 1  | 17.4% | 10.2% | 28.2% | 0   | --   | --    | 0.01    | 14.9  | 4  |  |  |
| Europe                               | 6  | 18.1% | 12.1% | 26.3% | 60  | 0.29 | 91.6% |         |       |    |  |  |
| Middle East                          | 1  | 32.1% | 24.9% | 40.3% | 0   | --   | --    |         |       |    |  |  |
| North America                        | 11 | 17.4% | 10.9% | 26.6% | 185 | 0.76 | 94.6% |         |       |    |  |  |
| Oceania                              | 1  | 3.7%  | 0.5%  | 22.1% | 0   | --   | --    |         |       |    |  |  |
| <b>Specialty</b>                     |    |       |       |       |     |      |       |         |       |    |  |  |
| Colorectal Surgery, Vascular Surgery | 1  | 28.8% | 25.0% | 33.0% | 0   | --   | --    | <0.0001 | 204.0 | 15 |  |  |
| Emergency Medicine                   | 2  | 20.5% | 6.6%  | 48.6% | 8   | 0.78 | 87.6% |         |       |    |  |  |
| General Practice                     | 3  | 17.0% | 6.3%  | 38.2% | 40  | 0.90 | 95.0% |         |       |    |  |  |
| Gynecologic Oncology                 | 2  | 13.8% | 1.4%  | 63.8% | 5   | 2.48 | 80.9% |         |       |    |  |  |
| Internal Medicine                    | 1  | 4.1%  | 1.3%  | 11.8% | 0   | --   | --    |         |       |    |  |  |
| Obstetrics and Gynecology            | 1  | 11.1% | 8.3%  | 14.7% | 0   | --   | --    |         |       |    |  |  |
| Ophthalmology                        | 1  | 25.0% | 18.2% | 33.4% | 0   | --   | --    |         |       |    |  |  |
| Orthopedic Surgery                   | 1  | 17.4% | 10.2% | 28.2% | 0   | --   | --    |         |       |    |  |  |
| Pain Medicine                        | 1  | 19.3% | 14.5% | 25.3% | 0   | --   | --    |         |       |    |  |  |
| Pediatric Critical Care              | 1  | 21.4% | 16.8% | 26.9% | 0   | --   | --    |         |       |    |  |  |
| Plastic Surgery                      | 1  | 4.9%  | 3.4%  | 7.2%  | 0   | --   | --    |         |       |    |  |  |
| Primary Care                         | 1  | 16.7% | 12.2% | 22.3% | 0   | --   | --    |         |       |    |  |  |
| Radiation Oncology                   | 1  | 31.9% | 20.3% | 46.4% | 0   | --   | --    |         |       |    |  |  |
| Surgery                              | 1  | 46.5% | 40.0% | 53.2% | 0   | --   | --    |         |       |    |  |  |
| Transplant Surgery                   | 1  | 14.4% | 10.2% | 19.8% | 0   | --   | --    |         |       |    |  |  |



|                                                                              |          |              |            |            |               |                        |                      |                |                |               |               |                |
|------------------------------------------------------------------------------|----------|--------------|------------|------------|---------------|------------------------|----------------------|----------------|----------------|---------------|---------------|----------------|
| Urology                                                                      | 1        | 9.8%         | 4.1%       | 21.5%      | 0             | --                     | --                   |                |                |               |               |                |
| <b>Meta-regression Results</b>                                               |          |              |            |            |               |                        |                      |                |                |               |               |                |
| <b>Baseline Year (Range)</b>                                                 | <b>k</b> | <b>Slope</b> | <b>SE</b>  | <b>Z</b>   | <b>P(mod)</b> | <b>LCI</b>             | <b>UCI</b>           | <b>Q(mod)</b>  | <b>df(mod)</b> | <b>P(het)</b> | <b>Q(het)</b> | <b>df(het)</b> |
| 2002-2016                                                                    | 15       | 0.01%        | 0.8%       | 0.02       | 0.98          | -1.5%                  | 1.5%                 | 0.0004         | 1              | <0.0001       | 204           | 13             |
| <b>Average Age (Range)</b>                                                   |          |              |            |            |               |                        |                      |                |                |               |               |                |
| 45.6-50.3                                                                    | 10       | 2.2%         | 2.7%       | 0.8        | 0.42          | -3.2%                  | 7.5%                 | 0.64           | 1              | <0.0001       | 152           | 8              |
| <b>Proportion of Male Participants (Range)</b>                               |          |              |            |            |               |                        |                      |                |                |               |               |                |
| 17-94%                                                                       | 14       | 18.6%        | 15.6%      | 1.2        | 0.23          | -12.0%                 | 49.1%                | 1.42           | 1              | <0.0001       | 292           | 12             |
| <b>H. Diminished Personal Accomplishment defined by MBI-PA<sub>≤</sub>33</b> |          |              |            |            |               |                        |                      |                |                |               |               |                |
| <b>Stratified Meta-analysis Results</b>                                      |          |              |            |            |               |                        |                      |                |                |               |               |                |
| <b>United States vs. Not</b>                                                 | <b>k</b> | <b>Prev.</b> | <b>LCI</b> | <b>UCI</b> | <b>Q</b>      | <b>tau<sup>2</sup></b> | <b>I<sup>2</sup></b> | <b>P(diff)</b> | <b>Q(diff)</b> | <b>df</b>     |               |                |
| Not United States                                                            | 30       | 32.4%        | 26.7%      | 38.6%      | 982           | 0.50                   | 97.0%                | 0.01           | 7.2            | 1             |               |                |
| United States                                                                | 10       | 20.8%        | 15.7%      | 27.0%      | 395           | 0.27                   | 97.7%                |                |                |               |               |                |
| <b>Country</b>                                                               |          |              |            |            |               |                        |                      |                |                |               |               |                |
| Armenia                                                                      | 1        | 50.0%        | 41.5%      | 58.5%      | 0             | --                     | --                   | <0.0001        | 721.8          | 20            |               |                |
| Australia                                                                    | 1        | 2.5%         | 0.4%       | 15.7%      | 0             | --                     | --                   |                |                |               |               |                |
| Brazil                                                                       | 3        | 48.4%        | 34.8%      | 62.3%      | 6             | 0.16                   | 65.5%                |                |                |               |               |                |
| Canada                                                                       | 2        | 19.1%        | 12.5%      | 28.2%      | 1             | 0.03                   | 14.4%                |                |                |               |               |                |
| China                                                                        | 1        | 55.3%        | 48.8%      | 61.7%      | 0             | --                     | --                   |                |                |               |               |                |
| Croatia                                                                      | 1        | 60.0%        | 51.2%      | 68.2%      | 0             | --                     | --                   |                |                |               |               |                |
| Denmark                                                                      | 3        | 33.5%        | 28.4%      | 39.0%      | 12            | 0.04                   | 83.5%                |                |                |               |               |                |
| Germany                                                                      | 1        | 35.9%        | 33.7%      | 38.2%      | 0             | --                     | --                   |                |                |               |               |                |
| India                                                                        | 1        | 50.0%        | 12.4%      | 87.7%      | 0             | --                     | --                   |                |                |               |               |                |
| Iran                                                                         | 1        | 55.8%        | 44.7%      | 66.5%      | 0             | --                     | --                   |                |                |               |               |                |
| Israel                                                                       | 1        | 31.6%        | 24.4%      | 39.9%      | 0             | --                     | --                   |                |                |               |               |                |
| Italy, Portugal, Spain                                                       | 1        | 21.5%        | 15.1%      | 29.7%      | 0             | --                     | --                   |                |                |               |               |                |
| Japan                                                                        | 1        | 62.0%        | 58.3%      | 65.5%      | 0             | --                     | --                   |                |                |               |               |                |
| Kuwait                                                                       | 1        | 46.5%        | 39.7%      | 53.4%      | 0             | --                     | --                   |                |                |               |               |                |
| New Zealand                                                                  | 2        | 33.2%        | 28.2%      | 38.5%      | 1             | 0                      | 0%                   |                |                |               |               |                |
| Peru                                                                         | 1        | 18.1%        | 16.5%      | 19.7%      | 0             | --                     | --                   |                |                |               |               |                |
| Portugal                                                                     | 1        | 16.7%        | 11.5%      | 23.5%      | 0             | --                     | --                   |                |                |               |               |                |
| Serbia                                                                       | 1        | 0.4%         | 0.03%      | 6.3%       | 0             | --                     | --                   |                |                |               |               |                |
| Spain                                                                        | 4        | 23.4%        | 9.1%       | 48.3%      | 77            | 1.19                   | 96.1%                |                |                |               |               |                |

|                                              |          |              |           |          |          |            |            |               |                |               |               |                |
|----------------------------------------------|----------|--------------|-----------|----------|----------|------------|------------|---------------|----------------|---------------|---------------|----------------|
| Switzerland                                  | 2        | 17.4%        | 14.6%     | 20.7%    | 2        | 0.01       | 56.7%      |               |                |               |               |                |
| United States                                | 10       | 20.8%        | 15.7%     | 27.0%    | 395      | 0.27       | 97.7%      |               |                |               |               |                |
| <b>Continent</b>                             |          |              |           |          |          |            |            |               |                |               |               |                |
| Asia                                         | 4        | 56.6%        | 49.9%     | 63.0%    | 8        | 0.04       | 63.7%      | <0.0001       | 69.8           | 5             |               |                |
| Europe                                       | 14       | 26.6%        | 20.8%     | 33.4%    | 363      | 0.32       | 96.4%      |               |                |               |               |                |
| Middle East                                  | 3        | 44.1%        | 31.8%     | 57.3%    | 13       | 0.18       | 84.7%      |               |                |               |               |                |
| North America                                | 12       | 20.8%        | 16.0%     | 26.5%    | 397      | 0.26       | 97.2%      |               |                |               |               |                |
| Oceania                                      | 3        | 26.9%        | 14.2%     | 45.0%    | 9        | 0.33       | 78.0%      |               |                |               |               |                |
| South America                                | 4        | 38.7%        | 17.7%     | 64.8%    | 80       | 1.14       | 96.2%      |               |                |               |               |                |
| <b>Specialty</b>                             |          |              |           |          |          |            |            |               |                |               |               |                |
| Anesthesia                                   | 2        | 42.7%        | 27.2%     | 59.7%    | 2        | 0.15       | 59.3%      | <0.0001       | 720.2          | 20            |               |                |
| Emergency Medicine                           | 2        | 55.6%        | 44.6%     | 66.0%    | 0        | 0          | 0%         |               |                |               |               |                |
| ENT                                          | 2        | 11.0%        | 8.4%      | 14.1%    | 0        | 0          | 0%         |               |                |               |               |                |
| Family Medicine                              | 1        | 60.0%        | 51.2%     | 68.2%    | 0        | --         | --         |               |                |               |               |                |
| Family Medicine, General Practice            | 1        | 46.5%        | 39.7%     | 53.4%    | 0        | --         | --         |               |                |               |               |                |
| General and Subspecialty Internal Medicine   | 1        | 13.2%        | 10.4%     | 16.6%    | 0        | --         | --         |               |                |               |               |                |
| General Practice                             | 3        | 36.0%        | 33.1%     | 39.1%    | 1        | 0          | 0%         |               |                |               |               |                |
| General Practice, Oncology, Pediatrics       | 1        | 19.6%        | 15.8%     | 23.9%    | 0        | --         | --         |               |                |               |               |                |
| General Practice, Psychiatry                 | 1        | 0.4%         | 0.03%     | 6.3%     | 0        | --         | --         |               |                |               |               |                |
| Intensive Care                               | 2        | 58.8%        | 53.3%     | 64.0%    | 0        | 0          | 0%         |               |                |               |               |                |
| Multiple Palliative Care-Related Specialties | 1        | 2.5%         | 0.4%      | 15.7%    | 0        | --         | --         |               |                |               |               |                |
| Multiple Specialties                         | 9        | 30.2%        | 22.1%     | 39.7%    | 906      | 0.40       | 99.1%      |               |                |               |               |                |
| Neurology                                    | 1        | 21.2%        | 19.3%     | 23.3%    | 0        | --         | --         |               |                |               |               |                |
| Neurosurgery                                 | 1        | 27.2%        | 18.6%     | 37.8%    | 0        | --         | --         |               |                |               |               |                |
| Obstetrics and Gynecology                    | 1        | 14.3%        | 4.7%      | 36.1%    | 0        | --         | --         |               |                |               |               |                |
| Oncology                                     | 1        | 21.5%        | 15.1%     | 29.7%    | 0        | --         | --         |               |                |               |               |                |
| Oncology, Palliative Care                    | 1        | 62.0%        | 58.3%     | 65.5%    | 0        | --         | --         |               |                |               |               |                |
| Orthopedic Surgery                           | 1        | 33.3%        | 13.1%     | 62.4%    | 0        | --         | --         |               |                |               |               |                |
| Pediatrics                                   | 1        | 32.1%        | 24.8%     | 0.4038   | 0        | --         | --         |               |                |               |               |                |
| Primary Care                                 | 6        | 19.9%        | 12.7%     | 29.9%    | 87       | 0.42       | 94.3%      |               |                |               |               |                |
| Surgery                                      | 1        | 27.8%        | 12.1%     | 51.9%    | 0        | --         | --         |               |                |               |               |                |
|                                              |          |              |           |          |          |            |            |               |                |               |               |                |
| <b>Meta-regression Results</b>               |          |              |           |          |          |            |            |               |                |               |               |                |
| <b>Baseline Year (Range)</b>                 | <b>k</b> | <b>Slope</b> | <b>SE</b> | <b>Z</b> | <b>P</b> | <b>LCI</b> | <b>UCI</b> | <b>Q(mod)</b> | <b>df(mod)</b> | <b>P(het)</b> | <b>Q(het)</b> | <b>df(het)</b> |
| 2000-2016                                    | 29       | 0.2%         | 0.8%      | 0.3      | 0.80     | -1.3%      | 1.7%       | 0.07          | 1              | <0.0001       | 1776          | 27             |

|                                                |    |        |       |      |      |        |       |      |   |         |      |    |
|------------------------------------------------|----|--------|-------|------|------|--------|-------|------|---|---------|------|----|
| <b>Average Age (Range)</b>                     |    |        |       |      |      |        |       |      |   |         |      |    |
| 32.8-56.0                                      | 27 | -1.5%  | 0.6%  | -2.5 | 0.01 | -2.6%  | -0.3% | 6.48 | 1 | <0.0001 | 2489 | 25 |
| <b>Proportion of Male Participants (Range)</b> |    |        |       |      |      |        |       |      |   |         |      |    |
| 0-97%                                          | 36 | -15.5% | 12.1% | -1.3 | 0.20 | -39.3% | 8.2%  | 1.65 | 1 | <0.0001 | 2666 | 34 |

**eFigure.** Assessment of Small Study Effects by Funnel Plot

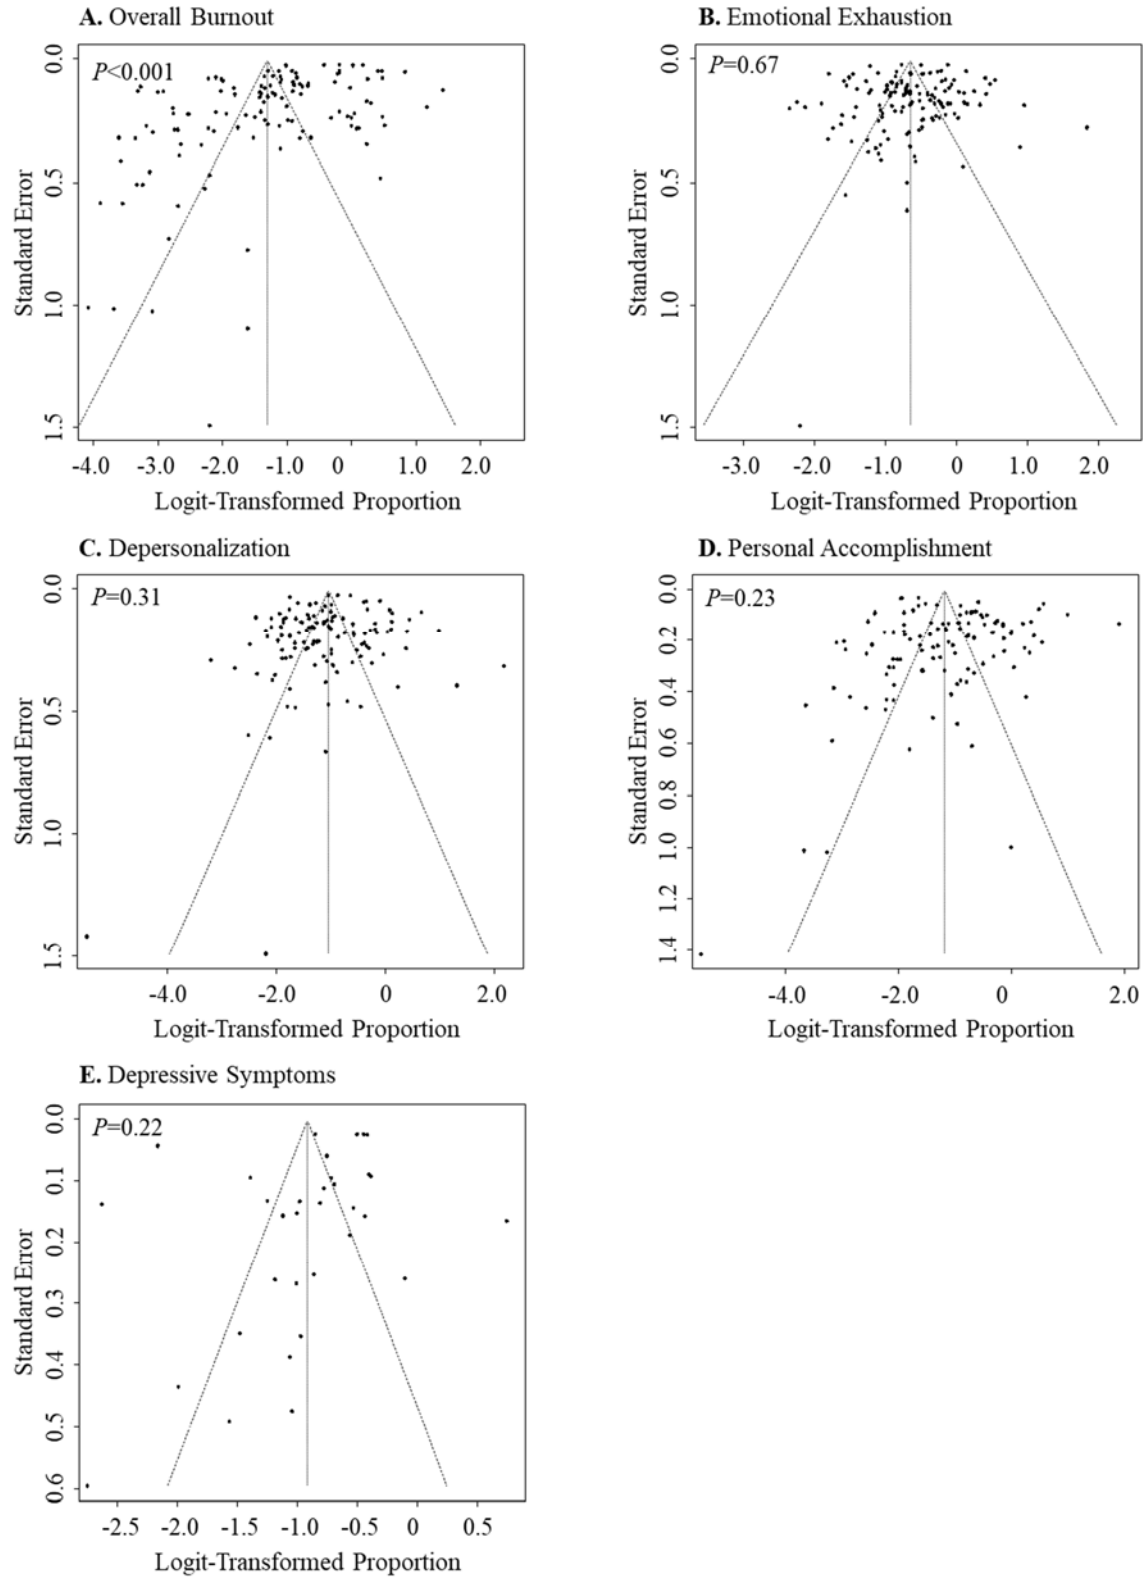

**Legend:**  $P$  values calculated using the linear regression test of funnel plot asymmetry.<sup>6</sup>

## eReferences

1. Borenstein M, Hedges LV, Higgins JPT, Rothstein HR. A basic introduction to fixed-effect and random-effects models for meta-analysis. *Res Synth Methods*. 2010;1(2):97-111. doi:10.1002/jrsm.12
2. Higgins JPT, Thompson SG. Quantifying heterogeneity in a meta-analysis. *Stat Med*. 2002;21(11):1539-1558. doi:10.1002/sim.1186
3. Higgins JPT, Thompson SG, Deeks JJ, Altman DG. Measuring inconsistency in meta-analyses. *BMJ*. 2003;327(7414):557-560.
4. Sterne JAC, Jüni P, Schulz KF, Altman DG, Bartlett C, Egger M. Statistical methods for assessing the influence of study characteristics on treatment effects in 'meta-epidemiological' research. *Stat Med*. 2002;21(11):1513-1524. doi:10.1002/sim.1184
5. van Houwelingen HC, Arends LR, Stijnen T. Advanced methods in meta-analysis: multivariate approach and meta-regression. *Stat Med*. 2002;21(4):589-624.
6. Egger M, Davey Smith G, Schneider M, Minder C. Bias in meta-analysis detected by a simple, graphical test. *BMJ*. 1997;315(7109):629-634.
7. Sterne JAC, Egger M. Funnel plots for detecting bias in meta-analysis. *J Clin Epidemiol*. 2001;54(10):1046-1055. doi:10.1016/S0895-4356(01)00377-8
8. R Core Team. *R: A Language and Environment for Statistical Computing*. Vienna, Austria: R Foundation for Statistical Computing; 2015. <http://www.R-project.org/>.
9. Massou S, Doghmi N, Belhaj A, et al. Enquête sur le syndrome d'épuisement professionnel chez les personnels d'anesthésie réanimation de quatre hôpitaux universitaires marocains. *Ann Méd-Psychol Rev Psychiatr*. 2013;171(8):538-542. doi:10.1016/j.amp.2012.02.024
10. Margaryan AG. Burnout in primary health care physicians: A pilot study. *New Armen Med J*. 2010. [https://www.researchgate.net/publication/289652629\\_Burnout\\_in\\_primary\\_health\\_care\\_physicians\\_A\\_pilot\\_study](https://www.researchgate.net/publication/289652629_Burnout_in_primary_health_care_physicians_A_pilot_study). Accessed March 10, 2018.
11. Xiao Y, Wang J, Chen S, et al. Psychological distress, burnout level and job satisfaction in emergency medicine: A cross-sectional study of physicians in China. *Emerg Med Australas EMA*. 2014;26(6):538-542. doi:10.1111/1742-6723.12315
12. Wu H, Liu L, Wang Y, Gao F, Zhao X, Wang L. Factors associated with burnout among Chinese hospital doctors: a cross-sectional study. *BMC Public Health*. 2013;13:786. doi:10.1186/1471-2458-13-786
13. Wang Z, Xie Z, Dai J, Zhang L, Huang Y, Chen B. Physician burnout and its associated factors: a cross-sectional study in Shanghai. *J Occup Health*. 2014;56(1):73-83.

14. Siu CFY, Yuen SK, Cheung A. Burnout among public doctors in Hong Kong: cross-sectional survey. *Hong Kong Med J Xianggang Yi Xue Za Zhi*. 2012;18(3):186-192.
15. Li H, Zuo M, Gelb AW, et al. Chinese Anesthesiologists Have High Burnout and Low Job Satisfaction: A Cross-Sectional Survey. *Anesth Analg*. 2018;126(3):1004-1012. doi:10.1213/ANE.0000000000002776
16. Das S, Barman S, Datta S, et al. Degree of burnout among emergency healthcare workers and factors influencing level of burnout: a pilot study. *Delhi Psychiatry J*. 2016;36-47(1). [https://www.researchgate.net/profile/Shyamanta\\_Das/publication/304980344\\_Degree\\_of\\_burnout\\_among\\_emergency\\_healthcare\\_workers\\_and\\_factors\\_influencing\\_level\\_of\\_burnout\\_a\\_pilot\\_study/links/57fd057e08ae406ad1f3b95a/Degree-of-burnout-among-emergency-healthcare-workers-and-factors-influencing-level-of-burnout-a-pilot-study.pdf](https://www.researchgate.net/profile/Shyamanta_Das/publication/304980344_Degree_of_burnout_among_emergency_healthcare_workers_and_factors_influencing_level_of_burnout_a_pilot_study/links/57fd057e08ae406ad1f3b95a/Degree-of-burnout-among-emergency-healthcare-workers-and-factors-influencing-level-of-burnout-a-pilot-study.pdf).
17. Langade D, Modi PD, Sidhwa YF, et al. Burnout Syndrome Among Medical Practitioners Across India: A Questionnaire-Based Survey. *Cureus*. 2016;8(9):e771. doi:10.7759/cureus.771
18. Nishimura K, Nakamura F, Takegami M, et al. Cross-sectional survey of workload and burnout among Japanese physicians working in stroke care: the nationwide survey of acute stroke care capacity for proper designation of comprehensive stroke center in Japan (J-ASPECT) study. *Circ Cardiovasc Qual Outcomes*. 2014;7(3):414-422. doi:10.1161/CIRCOUTCOMES.113.000159
19. Saijo Y, Chiba S, Yoshioka E, et al. Effects of work burden, job strain and support on depressive symptoms and burnout among Japanese physicians. *Int J Occup Med Environ Health*. 2014;27(6):980-992. doi:10.2478/s13382-014-0324-2
20. Asai M, Morita T, Akechi T, et al. Burnout and psychiatric morbidity among physicians engaged in end-of-life care for cancer patients: a cross-sectional nationwide survey in Japan. *Psychooncology*. 2007;16(5):421-428. doi:10.1002/pon.1066
21. Zafar W, Khan UR, Siddiqui SA, Jamali S, Razzak JA. Workplace Violence and Self-reported Psychological Health: Coping with Post-traumatic Stress, Mental Distress, and Burnout among Physicians Working in the Emergency Departments Compared to Other Specialties in Pakistan. *J Emerg Med*. 2016;50(1):167-177.e1. doi:10.1016/j.jemermed.2015.02.049
22. Sadat-Ali M, Al-Habdan IM, Al-Dakheel DA, Shriyan D. Are orthopedic surgeons prone to burnout? *Saudi Med J*. 2005;26(8):1180-1182.
23. See KC, Lim TK, Kua EH, Phua J, Chua GS, Ho KY. Stress and Burnout among Physicians: Prevalence and Risk Factors in a Singaporean Internal Medicine Programme. *Ann Acad Med Singapore*. 2016;45(10):471-474.
24. Chou L-P, Li C-Y, Hu SC. Job stress and burnout in hospital employees: comparisons of different medical professions in a regional hospital in Taiwan. *BMJ Open*. 2014;4(2):e004185. doi:10.1136/bmjopen-2013-004185

25. Chen K-Y, Yang C-M, Lien C-H, et al. Burnout, job satisfaction, and medical malpractice among physicians. *Int J Med Sci.* 2013;10(11):1471-1478. doi:10.7150/ijms.6743
26. Schooley B, Hikmet N, Tarcan M, Yorgancioglu G. Comparing Burnout Across Emergency Physicians, Nurses, Technicians, and Health Information Technicians Working for the Same Organization. *Medicine (Baltimore).* 2016;95(10):e2856. doi:10.1097/MD.0000000000002856
27. Wurm W, Vogel K, Holl A, et al. Depression-Burnout Overlap in Physicians. *PloS One.* 2016;11(3):e0149913. doi:10.1371/journal.pone.0149913
28. Eelen S, Bauwens S, Baillon C, Distelmans W, Jacobs E, Verzelen A. The prevalence of burnout among oncology professionals: oncologists are at risk of developing burnout. *Psychooncology.* 2014;23(12):1415-1422. doi:10.1002/pon.3579
29. Vandebroek S, Van Gerven E, De Witte H, Vanhaecht K, Godderis L. Burnout in Belgian physicians and nurses. *Occup Med Oxf Engl.* 2017;67(7):546-554. doi:10.1093/occmed/kqx126
30. Selmanovic S, Ramic E, Pranjic N, Brekalo-Lazarevic S, Pasic Z, Alic A. Stress at work and burnout syndrome in hospital doctors. *Med Arh.* 2011;65(4):221-224.
31. Stanetić K, Tesanović G. Influence of age and length of service on the level of stress and burnout syndrome. *Med Pregl.* 2013;66(3-4):153-162.
32. Ožvačić Adžić Z, Katić M, Kern J, Soler JK, Cerovečki V, Polašek O. Is burnout in family physicians in Croatia related to interpersonal quality of care? *Arh Hig Rada Toksikol.* 2013;64(2):69-78. doi:10.2478/10004-1254-64-2013-2307
33. Pedersen AF, Andersen CM, Olesen F, Vedsted P. Risk of Burnout in Danish GPs and Exploration of Factors Associated with Development of Burnout: A Two-Wave Panel Study. *Int J Fam Med.* 2013;2013:603713. doi:10.1155/2013/603713
34. Pedersen AF, Sørensen JK, Bruun NH, Christensen B, Vedsted P. Risky alcohol use in Danish physicians: Associated with alexithymia and burnout? *Drug Alcohol Depend.* 2016;160:119-126. doi:10.1016/j.drugalcdep.2015.12.038
35. Pedersen AF, Ingeman ML, Vedsted P. Empathy, burn-out and the use of gut feeling: a cross-sectional survey of Danish general practitioners. *BMJ Open.* 2018;8(2):e020007. doi:10.1136/bmjopen-2017-020007
36. Brøndt A, Sokolowski I, Olesen F, Vedsted P. Continuing medical education and burnout among Danish GPs. *Br J Gen Pract J R Coll Gen Pract.* 2008;58(546):15-19. doi:10.3399/bjgp08X263767
37. Lesage F-X, Berjot S, Altintas E, Paty B. Burnout among occupational physicians: a threat to occupational health systems?--A nationwide cross-sectional survey. *Ann Occup Hyg.* 2013;57(7):913-919. doi:10.1093/annhyg/met013

38. Dréano-Hartz S, Rhondali W, Ledoux M, et al. Burnout among physicians in palliative care: Impact of clinical settings. *Palliat Support Care*. 2016;14(4):402-410. doi:10.1017/S1478951515000991
39. Lamothe M, Boujut E, Zenasni F, Sultan S. To be or not to be empathic: the combined role of empathic concern and perspective taking in understanding burnout in general practice. *BMC Fam Pract*. 2014;15:15. doi:10.1186/1471-2296-15-15
40. Embriaco N, Azoulay E, Barrau K, et al. High level of burnout in intensivists: prevalence and associated factors. *Am J Respir Crit Care Med*. 2007;175(7):686-692. doi:10.1164/rccm.200608-1184OC
41. Böhle A, Baumgärtel M, Götz ML, Müller EH, Jocham D. Burn-out of urologists in the county of Schleswig-Holstein, Germany: a comparison of hospital and private practice urologists. *J Urol*. 2001;165(4):1158-1161.
42. Richter A, Kostova P, Harth V, Wegner R. Children, care, career - a cross-sectional study on the risk of burnout among German hospital physicians at different career stages. *J Occup Med Toxicol Lond Engl*. 2014;9(1):41. doi:10.1186/s12995-014-0041-6
43. Pantenburg B, Lupp M, König H-H, Riedel-Heller SG. Burnout among young physicians and its association with physicians' wishes to leave: results of a survey in Saxony, Germany. *J Occup Med Toxicol Lond Engl*. 2016;11:2. doi:10.1186/s12995-016-0091-z
44. Panagopoulou E, Montgomery A, Benos A. Burnout in internal medicine physicians: Differences between residents and specialists. *Eur J Intern Med*. 2006;17(3):195-200. doi:10.1016/j.ejim.2005.11.013
45. O'Kelly F, Manecksha RP, Quinlan DM, et al. Rates of self-reported "burnout" and causative factors amongst urologists in Ireland and the UK: a comparative cross-sectional study. *BJU Int*. 2016;117(2):363-372. doi:10.1111/bju.13218
46. Bressi C, Porcellana M, Gambini O, et al. Burnout among psychiatrists in Milan: a multicenter survey. *Psychiatr Serv Wash DC*. 2009;60(7):985-988. doi:10.1176/ps.2009.60.7.985
47. Bressi C, Manenti S, Porcellana M, et al. Haemato-oncology and burnout: an Italian survey. *Br J Cancer*. 2008;98(6):1046-1052. doi:10.1038/sj.bjc.6604270
48. Raggio B, Malacarne P. Burnout in intensive care unit. *Minerva Anesthesiol*. 2007;73(4):195-200.
49. Grassi L, Magnani K. Psychiatric morbidity and burnout in the medical profession: an Italian study of general practitioners and hospital physicians. *Psychother Psychosom*. 2000;69(6):329-334. doi:10.1159/000012416
50. Mattei A, Fiasca F, Mazzei M, Necozone S, Bianchini V. Stress and Burnout in Health-Care Workers after the 2009 L'Aquila Earthquake: A Cross-Sectional Observational Study. *Front Psychiatry*. 2017;8:98. doi:10.3389/fpsy.2017.00098



51. Volpe U, Luciano M, Palumbo C, Sampogna G, Del Vecchio V, Fiorillo A. Risk of burnout among early career mental health professionals. *J Psychiatr Ment Health Nurs*. 2014;21(9):774-781. doi:10.1111/jpm.12137
52. Travado L, Grassi L, Gil F, Ventura C, Martins C, Southern European Psycho-Oncology Study Group. Physician-patient communication among Southern European cancer physicians: the influence of psychosocial orientation and burnout. *Psychooncology*. 2005;14(8):661-670. doi:10.1002/pon.890
53. Pranckeviciene A, Tamasauskas A, Deltuva VP, Bunevicius A. Professional burnout and its correlates in Lithuanian neurosurgeons. *Acta Neurochir (Wien)*. 2016;158(8):1437-1445. doi:10.1007/s00701-016-2869-2
54. Mikalauskas A, Benetis R, Širvinskas E, et al. Burnout Among Anesthetists and Intensive Care Physicians. *Open Med Wars Pol*. 2018;13:105-112. doi:10.1515/med-2018-0017
55. Mikalauskas A, Širvinskas E, Marchertienė I, et al. Burnout among Lithuanian cardiac surgeons and cardiac anesthesiologists. *Med Kaunas Lith*. 2012;48(9):478-484.
56. Ruitenburg MM, Frings-Dresen MHW, Sluiter JK. The prevalence of common mental disorders among hospital physicians and their association with self-reported work ability: a cross-sectional study. *BMC Health Serv Res*. 2012;12:292-298. doi:10.1186/1472-6963-12-292
57. van der Ploeg E, Dorresteyn SM, Kleber RJ. Critical incidents and chronic stressors at work: their impact on forensic doctors. *J Occup Health Psychol*. 2003;8(2):157-166.
58. Meynaar IA, Saase J van, Feberwee T, Aerts TM, Bakker J, Thijsse W. Burnout among dutch intensivists - A nationwide survey. *Neth J Crit Care*. 2016;24(1):12-17.
59. van der Wal RAB, Bucx MJL, Hendriks JCM, Scheffer G-J, Prins JB. Psychological distress, burnout and personality traits in Dutch anaesthesiologists: A survey. *Eur J Anaesthesiol*. 2016;33(3):179-186. doi:10.1097/EJA.0000000000000375
60. Twellaar M, Winants Y, Houkes I. How healthy are Dutch general practitioners? Self-reported (mental) health among Dutch general practitioners. *Eur J Gen Pract*. 2008;14(1):4-9. doi:10.1080/13814780701814911
61. Głębocka A. The Relationship Between Burnout Syndrome Among the Medical Staff and Work Conditions in the Polish Healthcare System. *Adv Exp Med Biol*. 2017;968:61-70. doi:10.1007/5584\_2016\_179
62. Marôco J, Marôco AL, Leite E, Bastos C, Vazão MJ, Campos J. [Burnout in Portuguese Healthcare Professionals: An Analysis at the National Level]. *Acta Med Port*. 2016;29(1):24-30.
63. Marcelino G, Cerveira JM, Carvalho I, et al. Burnout levels among Portuguese family doctors: a nationwide survey. *BMJ Open*. 2012;2(3). doi:10.1136/bmjopen-2012-001050

64. Teixeira C, Ribeiro O, Fonseca AM, Carvalho AS. Burnout in intensive care units - a consideration of the possible prevalence and frequency of new risk factors: a descriptive correlational multicentre study. *BMC Anesthesiol.* 2013;13(1):38. doi:10.1186/1471-2253-13-38
65. Hagau N, Pop RS. Prevalence of burnout in Romanian anaesthesia and intensive care physicians and associated factors. *J Rom Anest Ter Int.* 2012;19:117–24.
66. Stojanovic-Tasic M, Latas M, Milosevic N, et al. Is Balint training associated with the reduced burnout among primary health care doctors? *Libyan J Med.* 2018;13(1):1440123. doi:10.1080/19932820.2018.1440123
67. Vicentic S, Gasic MJ, Milovanovic A, et al. Burnout, quality of life and emotional profile in general practitioners and psychiatrists. *Work Read Mass.* 2013;45(1):129-138. doi:10.3233/WOR-121484
68. Milenović M, Matejić B, Vasić V, Frost E, Petrović N, Simić D. High rate of burnout among anaesthesiologists in Belgrade teaching hospitals: Results of a cross-sectional survey. *Eur J Anaesthesiol.* 2016;33(3):187-194. doi:10.1097/EJA.0000000000000383
69. Putnik K, Houkes I. Work related characteristics, work-home and home-work interference and burnout among primary healthcare physicians: a gender perspective in a Serbian context. *BMC Public Health.* 2011;11:716. doi:10.1186/1471-2458-11-716
70. Yuguero Torres O, Esquerda Aresté M, Marsal Mora JR, Soler-González J. Association between Sick Leave Prescribing Practices and Physician Burnout and Empathy. *PloS One.* 2015;10(7):e0133379. doi:10.1371/journal.pone.0133379
71. Yuguero O, Ramon Marsal J, Esquerda M, Vivanco L, Soler-González J. Association between low empathy and high burnout among primary care physicians and nurses in Lleida, Spain. *Eur J Gen Pract.* 2017;23(1):4-10. doi:10.1080/13814788.2016.1233173
72. Chivato Pérez T, Campos Andreu A, Negro Alvarez JM, Caballero Martínez F. Professional burnout and work satisfaction in Spanish allergists: analysis of working conditions in the specialty. *J Investig Allergol Clin Immunol.* 2011;21(1):13-21.
73. Frutos-Llanes R, Jiménez-Blanco S, Blanco-Montagut LE. [Burnout syndrome in general practitioners of Avila]. *Semergen.* 2014;40(7):357-365. doi:10.1016/j.semerg.2014.02.008
74. Martínez de la Casa Muñoz A, del Castillo Comas C, Magaña Loarte E, Bru Espino I, Franco Moreno A, Segura Fragoso A. [Study of the prevalence of burnout in doctors in the Health Area of Talavera de la Reina]. *Aten Primaria.* 2003;32(6):343-348.
75. Vilà Falgueras M, Cruzate Muñoz C, Orfila Pernas F, Creixell Sureda J, González López MP, Davins Miralles J. [Burnout and teamwork in primary care teams]. *Aten Primaria.* 2015;47(1):25-31. doi:10.1016/j.aprim.2014.01.008

76. Atalaya F, María I, Díez D, Luis J. Síndrome de burnout en los ginecólogos del Hospital Universitario Virgen Macarena de Sevilla. *Prog Obstet Ginecol*. 2008;531-540. doi:10.1016/S0304-5013(08)72327-6
77. Riquelme I, Chacón J-I, Gándara A-V, et al. Prevalence of Burnout Among Pain Medicine Physicians and Its Potential Effect upon Clinical Outcomes in Patients with Oncologic Pain or Chronic Pain of Nononcologic Origin. *Pain Med Malden Mass*. January 2018. doi:10.1093/pm/pnx335
78. Yuguero O, Forné C, Esquerda M, Pifarré J, Abadías MJ, Viñas J. Empathy and burnout of emergency professionals of a health region: A cross-sectional study. *Medicine (Baltimore)*. 2017;96(37):e8030. doi:10.1097/MD.00000000000008030
79. Escribà-Agüir V, Pérez-Hoyos S. Psychological well-being and psychosocial work environment characteristics among emergency medical and nursing staff. *Stress Health*. 2007;23(3):153-160. doi:10.1002/smi.1131
80. Arigoni F, Bovier PA, Mermillod B, Waltz P, Sappino A-P. Prevalence of burnout among Swiss cancer clinicians, paediatricians and general practitioners: who are most at risk? *Support Care Cancer Off J Multinatl Assoc Support Care Cancer*. 2009;17(1):75-81. doi:10.1007/s00520-008-0465-6
81. Goehring C, Bouvier Gallacchi M, Künzi B, Bovier P. Psychosocial and professional characteristics of burnout in Swiss primary care practitioners: a cross-sectional survey. *Swiss Med Wkly*. 2005;135(7-8):101-108. doi:2005/07/smw-10841
82. Merlani P, Verdon M, Businger A, et al. Burnout in ICU caregivers: a multicenter study of factors associated to centers. *Am J Respir Crit Care Med*. 2011;184(10):1140-1146. doi:10.1164/rccm.201101-0068OC
83. Hämmig O, Brauchli R, Bauer GF. Effort-reward and work-life imbalance, general stress and burnout among employees of a large public hospital in Switzerland. *Swiss Med Wkly*. 2012;142:w13577. doi:10.4414/smw.2012.13577
84. Upton D, Mason V, Doran B, Solowiej K, Shiralkar U, Shiralkar S. The experience of burnout across different surgical specialties in the United Kingdom: a cross-sectional survey. *Surgery*. 2012;151(4):493-501. doi:10.1016/j.surg.2011.09.035
85. Orton P, Orton C, Pereira Gray D. Depersonalised doctors: a cross-sectional study of 564 doctors, 760 consultations and 1876 patient reports in UK general practice. *BMJ Open*. 2012;2:e000274. doi:10.1136/bmjopen-2011-000274
86. Taylor C, Graham J, Potts HW, Richards MA, Ramirez AJ. Changes in mental health of UK hospital consultants since the mid-1990s. *Lancet Lond Engl*. 2005;366(9487):742-744. doi:10.1016/S0140-6736(05)67178-4
87. Colville GA, Smith JG, Brierley J, et al. Coping With Staff Burnout and Work-Related Posttraumatic Stress in Intensive Care. *Pediatr Crit Care Med J Soc Crit Care Med World Fed*

88. Sharma A, Sharp DM, Walker LG, Monson JRT. Stress and burnout in colorectal and vascular surgical consultants working in the UK National Health Service. *Psychooncology*. 2008;17(6):570-576. doi:10.1002/pon.1269
89. Soltanifar A, Pishbin E, Attaran Mashhadi N, Najaf Najafi M, Siahtir M. Burnout among female emergency medicine physicians: A nationwide study. *Emerg Med Australas EMA*. February 2018. doi:10.1111/1742-6723.12941
90. Ahmadpanah M, Torabian S, Dastore K, Jahangard L, Haghghi M. Association of occupational burnout and type of personality in Iranian general practitioners. *Work Read Mass*. 2015;51(2):315-319. doi:10.3233/WOR-141903
91. Kushnir T, Greenberg D, Madjar N, Hadari I, Yermiahu Y, Bachner YG. Is burnout associated with referral rates among primary care physicians in community clinics? *Fam Pract*. 2014;31(1):44-50. doi:10.1093/fampra/cmt060
92. Al-Shoraian GMJ, Hussain N, Alajmi MF, Kamel MI, El-Shazly MK. Burnout among family and general practitioners. *Alex J Med*. 2011;47(4):359-364. doi:10.1016/j.ajme.2011.10.005
93. Hamdan M, Hamra AA. Burnout among workers in emergency Departments in Palestinian hospitals: prevalence and associated factors. *BMC Health Serv Res*. 2017;17(1):407. doi:10.1186/s12913-017-2356-3
94. Abdulla L, Al-Qahtani DM, Al-Kuwari MG. Prevalence and determinants of burnout syndrome among primary healthcare physicians in Qatar. *South Afr Fam Pract*. 2011;53(4):380-383. doi:10.1080/20786204.2011.10874118
95. Al-Dubai SAR, Rampal KG. Prevalence and associated factors of burnout among doctors in Yemen. *J Occup Health*. 2010;52(1):58-65.
96. Amanullah S, McNally K, Zelin J, Cole J, Cernovsky Z. Are burnout prevention programs for hospital physicians needed? *Asian J Psychiatry*. 2017;26:66-69. doi:10.1016/j.ajp.2017.01.009
97. Wright JG, Khetani N, Stephens D. Burnout among faculty physicians in an academic health science centre. *Paediatr Child Health*. 2011;16(7):409-413.
98. Helewa RM, Kholdebarin R, Hochman DJ. Attending surgeon burnout and satisfaction with the establishment of a regional acute care surgical service. *Can J Surg J Can Chir*. 2012;55(5):312-316. doi:10.1503/cjs.000611
99. Lee FJ, Stewart M, Brown JB. Stress, burnout, and strategies for reducing them: what's the situation among Canadian family physicians? *Can Fam Physician Med Fam Can*. 2008;54(2):234-235.

100. Lloyd S, Streiner D, Shannon S. Burnout, depression, life and job satisfaction among Canadian emergency physicians. *J Emerg Med.* 1994;12(4):559-565.
101. Elit L, Trim K, Mand-Bains IH, Sussman J, Grunfeld E, Society of Gynecologic Oncology Canada. Job satisfaction, stress, and burnout among Canadian gynecologic oncologists. *Gynecol Oncol.* 2004;94(1):134-139. doi:10.1016/j.ygyno.2004.04.014
102. Viviers S, Lachance L, Maranda M-F, Ménard C. Burnout, psychological distress, and overwork: the case of Quebec's ophthalmologists. *Can J Ophthalmol J Can Ophtalmol.* 2008;43(5):535-546. doi:10.3129/i08-132
103. Dyrbye LN, Shanafelt TD, Thomas MR, Durning SJ. Brief observation: a national study of burnout among internal medicine clerkship directors. *Am J Med.* 2009;122(3):310-312. doi:10.1016/j.amjmed.2008.11.008
104. Puffer JC, Knight HC, O'Neill TR, et al. Prevalence of Burnout in Board Certified Family Physicians. *J Am Board Fam Med JABFM.* 2017;30(2):125-126. doi:10.3122/jabfm.2017.02.160295
105. Johns MM, Ossoff RH. Burnout in academic chairs of otolaryngology: head and neck surgery. *The Laryngoscope.* 2005;115(11):2056-2061. doi:10.1097/01.MLG.0000181492.36179.8B
106. Gabbe SG, Melville J, Mandel L, Walker E. Burnout in chairs of obstetrics and gynecology: diagnosis, treatment, and prevention. *Am J Obstet Gynecol.* 2002;186(4):601-612.
107. Cruz OA, Pole CJ, Thomas SM. Burnout in chairs of academic departments of ophthalmology. *Ophthalmology.* 2007;114(12):2350-2355. doi:10.1016/j.ophtha.2007.04.058
108. De Oliveira GS, Almeida MD, Ahmad S, Fitzgerald PC, McCarthy RJ. Anesthesiology residency program director burnout. *J Clin Anesth.* 2011;23(3):176-182. doi:10.1016/j.jclinane.2011.02.001
109. Garcia HA, McGeary CA, Finley EP, Ketchum NS, McGeary DD, Peterson AL. Burnout among psychiatrists in the Veterans Health Administration. *Burn Res.* 2015;2(4):108-114. doi:10.1016/j.burn.2015.10.001
110. Rao SK, Kimball AB, Lehrhoff SR, et al. The Impact of Administrative Burden on Academic Physicians: Results of a Hospital-Wide Physician Survey. *Acad Med J Assoc Am Med Coll.* 2017;92(2):237-243. doi:10.1097/ACM.0000000000001461
111. Sheno AN, Kalyanaraman M, Pillai A, Raghava PS, Day S. Burnout and Psychological Distress Among Pediatric Critical Care Physicians in the United States. *Crit Care Med.* 2018;46(1):116-122. doi:10.1097/CCM.0000000000002751

112. Aggarwal S, Kusano AS, Carter JN, Gable L, Thomas CR, Chang DT. Stress and Burnout Among Residency Program Directors in United States Radiation Oncology Programs. *Int J Radiat Oncol Biol Phys*. 2015;93(4):746-753. doi:10.1016/j.ijrobp.2015.08.019
113. Lu DW, Dresden S, McCloskey C, Branzetti J, Gisondi MA. Impact of Burnout on Self-Reported Patient Care Among Emergency Physicians. *West J Emerg Med*. 2015;16(7):996-1001. doi:10.5811/westjem.2015.9.27945
114. Rath KS, Huffman LB, Phillips GS, Carpenter KM, Fowler JM. Burnout and associated factors among members of the Society of Gynecologic Oncology. *Am J Obstet Gynecol*. 2015;213(6):824.e1-9. doi:10.1016/j.ajog.2015.07.036
115. Kroll HR, Macaulay T, Jesse M. A Preliminary Survey Examining Predictors of Burnout in Pain Medicine Physicians in the United States. *Pain Physician*. 2016;19(5):E689-696.
116. Streu R, Hansen J, Abrahamse P, Alderman AK. Professional burnout among US plastic surgeons: results of a national survey. *Ann Plast Surg*. 2014;72(3):346-350. doi:10.1097/SAP.0000000000000056
117. Jesse MT, Abouljoud M, Eshelman A. Determinants of burnout among transplant surgeons: a national survey in the United States. *Am J Transplant Off J Am Soc Transplant Am Soc Transpl Surg*. 2015;15(3):772-778. doi:10.1111/ajt.13056
118. Bertges Yost W, Eshelman A, Raoufi M, Abouljoud MS. A national study of burnout among American transplant surgeons. *Transplant Proc*. 2005;37(2):1399-1401. doi:10.1016/j.transproceed.2005.01.055
119. Shanafelt TD, Gradishar WJ, Kosty M, et al. Burnout and career satisfaction among US oncologists. *J Clin Oncol Off J Am Soc Clin Oncol*. 2014;32(7):678-686. doi:10.1200/JCO.2013.51.8480
120. Golub JS, Johns MM, Weiss PS, Ramesh AK, Ossoff RH. Burnout in academic faculty of otolaryngology-head and neck surgery. *The Laryngoscope*. 2008;118(11):1951-1956. doi:10.1097/MLG.0b013e31818226e9
121. Fletcher AM, Pagedar N, Smith RJH. Factors correlating with burnout in practicing otolaryngologists. *Otolaryngol--Head Neck Surg Off J Am Acad Otolaryngol-Head Neck Surg*. 2012;146(2):234-239. doi:10.1177/0194599811428585
122. Simons BS, Foltz PA, Chalupa RL, Hylden CM, Dowd TC, Johnson AE. Burnout in U.S. Military Orthopaedic Residents and Staff Physicians. *Mil Med*. 2016;181(8):835-839. doi:10.7205/MILMED-D-15-00325
123. Shanafelt TD, Boone S, Tan L, et al. Burnout and satisfaction with work-life balance among us physicians relative to the general US population. *Arch Intern Med*. 2012;172(18):1377-1385. doi:10.1001/archinternmed.2012.3199

124. Shanafelt TD, Hasan O, Dyrbye LN, et al. Changes in Burnout and Satisfaction With Work-Life Balance in Physicians and the General US Working Population Between 2011 and 2014. *Mayo Clin Proc.* 2015;90(12):1600-1613. doi:10.1016/j.mayocp.2015.08.023
125. Shanafelt TD, West CP, Sloan JA, et al. Career fit and burnout among academic faculty. *Arch Intern Med.* 2009;169(10):990-995. doi:10.1001/archinternmed.2009.70
126. Busis NA, Shanafelt TD, Keran CM, et al. Burnout, career satisfaction, and well-being among US neurologists in 2016. *Neurology.* 2017;88(8):797-808. doi:10.1212/WNL.0000000000003640
127. Klimo P, DeCuyper M, Ragel BT, McCartney S, Couldwell WT, Boop FA. Career satisfaction and burnout among U.S. neurosurgeons: a feasibility and pilot study. *World Neurosurg.* 2013;80(5):e59-68. doi:10.1016/j.wneu.2012.09.009
128. McPhillips HA, Stanton B, Zuckerman B, Stapleton FB. Role of a pediatric department chair: factors leading to satisfaction and burnout. *J Pediatr.* 2007;151(4):425-430. doi:10.1016/j.jpeds.2007.03.016
129. Contag SP, Golub JS, Teknos TN, et al. Professional burnout among microvascular and reconstructive free-flap head and neck surgeons in the United States. *Arch Otolaryngol Head Neck Surg.* 2010;136(10):950-956. doi:10.1001/archoto.2010.175
130. Guest RS, Baser R, Li Y, Scardino PT, Brown AE, Kissane DW. Cancer surgeons' distress and well-being, I: the tension between a culture of productivity and the need for self-care. *Ann Surg Oncol.* 2011;18(5):1229-1235. doi:10.1245/s10434-011-1622-6
131. Evans RW, Ghosh K. A Survey of Headache Medicine Specialists on Career Satisfaction and Burnout. *Headache.* 2015;55(10):1448-1457. doi:10.1111/head.12708
132. Campbell DA, Sonnad SS, Eckhauser FE, Campbell KK, Greenfield LJ. Burnout among American surgeons. *Surgery.* 2001;130(4):696-702; discussion 702-705. doi:10.1067/msy.2001.116676
133. Saleh KJ, Quick JC, Conaway M, et al. The prevalence and severity of burnout among academic orthopaedic departmental leaders. *J Bone Joint Surg Am.* 2007;89(4):896-903. doi:10.2106/JBJS.F.00987
134. Kamal AH, Bull JH, Wolf SP, et al. Prevalence and Predictors of Burnout Among Hospice and Palliative Care Clinicians in the U.S. *J Pain Symptom Manage.* 2016;51(4):690-696. doi:10.1016/j.jpainsymman.2015.10.020
135. Shanafelt TD, Balch CM, Bechamps GJ, et al. Burnout and career satisfaction among American surgeons. *Ann Surg.* 2009;250(3):463-471. doi:10.1097/SLA.0b013e3181ac4dfd
136. Qureshi HA, Rawlani R, Mioton LM, Dumanian GA, Kim JYS, Rawlani V. Burnout phenomenon in U.S. plastic surgeons: risk factors and impact on quality of life. *Plast Reconstr Surg.* 2015;135(2):619-626. doi:10.1097/PRS.0000000000000855

137. De Stefano C, Philippon A-L, Krastinova E, et al. Effect of emergency physician burnout on patient waiting times. *Intern Emerg Med*. 2018;13(3):421-428. doi:10.1007/s11739-017-1706-9
138. Saleh KJ, Quick JC, Sime WE, Novicoff WM, Einhorn TA. Recognizing and preventing burnout among orthopaedic leaders. *Clin Orthop*. 2009;467(2):558-565. doi:10.1007/s11999-008-0622-8
139. Guntupalli KK, Fromm RE. Burnout in the internist--intensivist. *Intensive Care Med*. 1996;22(7):625-630.
140. West CP, Halvorsen AJ, Swenson SL, McDonald FS. Burnout and distress among internal medicine program directors: results of a national survey. *J Gen Intern Med*. 2013;28(8):1056-1063. doi:10.1007/s11606-013-2349-9
141. West CP, Dyrbye LN, Rabatin JT, et al. Intervention to promote physician well-being, job satisfaction, and professionalism: a randomized clinical trial. *JAMA Intern Med*. 2014;174(4):527-533. doi:10.1001/jamainternmed.2013.14387
142. Balch CM, Oreskovich MR, Dyrbye LN, et al. Personal consequences of malpractice lawsuits on American surgeons. *J Am Coll Surg*. 2011;213(5):657-667. doi:10.1016/j.jamcollsurg.2011.08.005
143. Gorelick MH, Schremmer R, Ruch-Ross H, Radabaugh C, Selbst S. Current Workforce Characteristics and Burnout in Pediatric Emergency Medicine. *Acad Emerg Med Off J Soc Acad Emerg Med*. 2016;23(1):48-54. doi:10.1111/acem.12845
144. Salmoirago-Blotcher E, Fitchett G, Leung K, et al. An exploration of the role of religion/spirituality in the promotion of physicians' wellbeing in Emergency Medicine. *Prev Med Rep*. 2016;3:189-195. doi:10.1016/j.pmedr.2016.01.009
145. Tak HJ, Curlin FA, Yoon JD. Association of Intrinsic Motivating Factors and Markers of Physician Well-Being: A National Physician Survey. *J Gen Intern Med*. 2017;32(7):739-746. doi:10.1007/s11606-017-3997-y
146. Weintraub AS, Geithner EM, Stroustrup A, Waldman ED. Compassion fatigue, burnout and compassion satisfaction in neonatologists in the US. *J Perinatol Off J Calif Perinat Assoc*. 2016;36(11):1021-1026. doi:10.1038/jp.2016.121
147. Kase SM, Waldman ED, Weintraub AS. A cross-sectional pilot study of compassion fatigue, burnout, and compassion satisfaction in pediatric palliative care providers in the United States. *Palliat Support Care*. February 2018:1-7. doi:10.1017/S1478951517001237
148. Yoon JD, Rasinski KA, Curlin FA. Conflict and emotional exhaustion in obstetrician-gynaecologists: a national survey. *J Med Ethics*. 2010;36(12):731-735. doi:10.1136/jme.2010.037762



149. Chew FS, Mulcahy MJ, Porrino JA, Mulcahy H, Relyea-Chew A. Prevalence of burnout among musculoskeletal radiologists. *Skeletal Radiol.* 2017;46(4):497-506. doi:10.1007/s00256-017-2578-9
150. Deckard GJ, Hicks LL, Hamory BH. The occurrence and distribution of burnout among infectious diseases physicians. *J Infect Dis.* 1992;165(2):224-228.
151. Deckard G, Meterko M, Field D. Physician burnout: an examination of personal, professional, and organizational relationships. *Med Care.* 1994;32(7):745-754.
152. Fields AI, Cuerdon TT, Brasseur CO, et al. Physician burnout in pediatric critical care medicine. *Crit Care Med.* 1995;23(8):1425-1429.
153. Hinami K, Whelan CT, Miller JA, Wolosin RJ, Wetterneck TB, Society of Hospital Medicine Career Satisfaction Task Force. Job characteristics, satisfaction, and burnout across hospitalist practice models. *J Hosp Med.* 2012;7(5):402-410. doi:10.1002/jhm.1907
154. Jager AJ, Tutty MA, Kao AC. Association Between Physician Burnout and Identification With Medicine as a Calling. *Mayo Clin Proc.* 2017;92(3):415-422. doi:10.1016/j.mayocp.2016.11.012
155. Rohland BM, Kruse GR, Rohrer JE. Validation of a single-item measure of burnout against the Maslach Burnout Inventory among physicians. *Stress Health.* 2004;20(2):75-79. doi:10.1002/smi.1002
156. Yoon JD, Hunt NB, Ravella KC, Jun CS, Curlin FA. Physician Burnout and the Calling to Care for the Dying: A National Survey. *Am J Hosp Palliat Care.* 2017;34(10):931-937. doi:10.1177/1049909116661817
157. Yoon JD, Daley BM, Curlin FA. The Association Between a Sense of Calling and Physician Well-Being: A National Study of Primary Care Physicians and Psychiatrists. *Acad Psychiatry J Am Assoc Dir Psychiatr Resid Train Assoc Acad Psychiatry.* 2017;41(2):167-173. doi:10.1007/s40596-016-0487-1
158. Helfrich CD, Dolan ED, Simonetti J, et al. Elements of team-based care in a patient-centered medical home are associated with lower burnout among VA primary care employees. *J Gen Intern Med.* 2014;29 Suppl 2:S659-666. doi:10.1007/s11606-013-2702-z
159. Starmer AJ, Frintner MP, Freed GL. Work-Life Balance, Burnout, and Satisfaction of Early Career Pediatricians. *Pediatrics.* 2016;137(4). doi:10.1542/peds.2015-3183
160. Doan-Wiggins L, Zun L, Cooper MA, Meyers DL, Chen EH. Practice satisfaction, occupational stress, and attrition of emergency physicians. Wellness Task Force, Illinois College of Emergency Physicians. *Acad Emerg Med Off J Soc Acad Emerg Med.* 1995;2(6):556-563.
161. Johnson JT, Wagner RL, Rueger RM, Goepfert H. Professional burnout among head and neck surgeons: results of a survey. *Head Neck.* 1993;15(6):557-560.

162. Glasheen JJ, Misky GJ, Reid MB, Harrison RA, Sharpe B, Auerbach A. Career satisfaction and burnout in academic hospital medicine. *Arch Intern Med*. 2011;171(8):782-785. doi:10.1001/archinternmed.2011.153
163. Whipple DA, Canellos GP. Burnout syndrome in the practice of oncology: results of a random survey of 1,000 oncologists. *J Clin Oncol Off J Am Soc Clin Oncol*. 1991;9(10):1916-1920. doi:10.1200/JCO.1991.9.10.1916
164. Coleman M, Dexter D, Nankivil N. Factors Affecting Physician Satisfaction and Wisconsin Medical Society Strategies to Drive Change. *WMJ Off Publ State Med Soc Wis*. 2015;114(4):135-142.
165. Silver JK, Bhatnagar S. Physician Burnout in Physical Medicine and Rehabilitation (PM&R): Should We Focus More on Physiatrists' Mission? *Am J Phys Med Rehabil*. 2017;96(8):e159-e161. doi:10.1097/PHM.0000000000000674
166. Allegra CJ, Hall R, Yothers G. Prevalence of burnout in the U.S. Oncology community: results of a 2003 survey. *J Oncol Pract*. 2005;1(4):140-147. doi:10.1200/JOP.2005.1.4.140
167. Pozdnyakova A, Laiteerapong N, Volerman A, et al. Impact of Medical Scribes on Physician and Patient Satisfaction in Primary Care. *J Gen Intern Med*. 2018;33(7):1109-1115. doi:10.1007/s11606-018-4434-6
168. Dolan ED, Mohr D, Lempa M, et al. Using a single item to measure burnout in primary care staff: a psychometric evaluation. *J Gen Intern Med*. 2015;30(5):582-587. doi:10.1007/s11606-014-3112-6
169. Stafford L, Judd F. Mental health and occupational wellbeing of Australian gynaecologic oncologists. *Gynecol Oncol*. 2010;116(3):526-532. doi:10.1016/j.ygyno.2009.10.080
170. Ifediora CO. Burnout among after-hours home visit doctors in Australia. *BMC Fam Pract*. 2016;17:2. doi:10.1186/s12875-016-0400-8
171. Dunwoodie DA, Auret K. Psychological morbidity and burnout in palliative care doctors in Western Australia. *Intern Med J*. 2007;37(10):693-698. doi:10.1111/j.1445-5994.2007.01384.x
172. Kluger MT, Townend K, Laidlaw T. Job satisfaction, stress and burnout in Australian specialist anaesthetists. *Anaesthesia*. 2003;58(4):339-345.
173. Winefield HR, Anstey TJ. Job stress in general practice: practitioner age, sex and attitudes as predictors. *Fam Pract*. 1991;8(2):140-144.
174. Pit SW, Hansen V. Factors influencing early retirement intentions in Australian rural general practitioners. *Occup Med Oxf Engl*. 2014;64(4):297-304. doi:10.1093/occmed/kqu028

175. Leung J, Rioseco P, Munro P. Stress, satisfaction and burnout amongst Australian and New Zealand radiation oncologists. *J Med Imaging Radiat Oncol*. 2015;59(1):115-124. doi:10.1111/1754-9485.12217
176. Surgenor LJ, Spearing RL, Horn J, Beautrais AL, Mulder RT, Chen P. Burnout in hospital-based medical consultants in the New Zealand public health system. *N Z Med J*. 2009;122(1300):11-18.
177. Bruce SM, Conaglen HM, Conaglen JV. Burnout in physicians: a case for peer-support. *Intern Med J*. 2005;35(5):272-278. doi:10.1111/j.1445-5994.2005.00782.x
178. Kumar S, Fischer J, Robinson E, Hatcher S, Bhagat RN. Burnout and job satisfaction in New Zealand psychiatrists: a national study. *Int J Soc Psychiatry*. 2007;53(4):306-316. doi:10.1177/0020764006074534
179. Gil-Monte PR, Marucco MA. [Burnout prevalence in pediatricians of general hospitals]. *Rev Saude Publica*. 2008;42(3):450-456.
180. Barbosa FT, Eloi RJ, Santos LMD, Leão BA, Lima FJC de, Sousa-Rodrigues CF de. Correlation between weekly working time and burnout syndrome among anesthesiologists of Maceió-AL. *Braz J Anesthesiol Elsevier*. 2017;67(2):115-121. doi:10.1016/j.bjane.2015.06.001
181. Barbosa FT, Leão BA, Tavares GMS, Santos JGRP dos. Burnout syndrome and weekly workload of on-call physicians: cross-sectional study. *Sao Paulo Med J Rev Paul Med*. 2012;130(5):282-288.
182. Garcia TT, Garcia PCR, Molon ME, et al. Prevalence of burnout in pediatric intensivists: an observational comparison with general pediatricians. *Pediatr Crit Care Med J Soc Crit Care Med World Fed Pediatr Intensive Crit Care Soc*. 2014;15(8):e347-353. doi:10.1097/PCC.0000000000000218
183. Barros D de S, Tironi MOS, Nascimento Sobrinho CL, et al. Intensive care unit physicians: socio-demographic profile, working conditions and factors associated with burnout syndrome. *Rev Bras Ter Intensiva*. 2008;20(3):235-240.
184. Tironi MOS, Nascimento Sobrinho CL, Barros D de S, et al. [Professional Burnout Syndrome of intensive care physicians from Salvador, Bahia, Brazil]. *Rev Assoc Medica Bras* 1992. 2009;55(6):656-662.
185. Zanatta AB, Lucca SR de. [Prevalence of burnout syndrome in health professionals of an onco-hematological pediatric hospital]. *Rev Esc Enferm U P*. 2015;49(2):253-260. doi:10.1590/S0080-623420150000200010
186. Govêia CS, Cruz TTM da, Miranda DB de, et al. [Association between burnout syndrome and anxiety in residents and anesthesiologists of the Federal District]. *Rev Bras Anesthesiol*. March 2018. doi:10.1016/j.bjan.2018.02.007

187. Aguirre Roldán AM, Quijano Barriga AM. [Burnout Syndrome, Family and Work Related Variables on General Practitioners in Bogota. A Strategy of Work Quality]. *Rev Colomb Psiquiatr*. 2015;44(4):198-205. doi:10.1016/j.rcp.2015.05.017
188. Maticorena-Quevedo J, Beas R, Anduaga-Beramendi A, Mayta-Tristán P. [Prevalence of burnout syndrome in peruvian physicians and nurses, ENSUSALUD 2014]. *Rev Peru Med Exp Salud Publica*. 2016;33(2):241-247.
189. Burghi G, Lambert J, Chaize M, et al. Prevalence, risk factors and consequences of severe burnout syndrome in ICU. *Intensive Care Med*. 2014;40(11):1785-1786. doi:10.1007/s00134-014-3454-x
190. Arayago R, Gonzalez A, Limongi M, Guevara H. Síndrome de burnout en residentes y especialistas de anestesiología. *Salus*. 2016;20(1):13-21.
