# Supplementary material
Source: PubMed Central journal article supplement (PMC6233645)
Supplement: jama-320-1131-s002.pdf [file jama-320-1131-s002.pdf]

## Data Sharing Statement

### Data

**Data available:** Yes

### Additional Information

**Explanation for why data not available:** This is a publication-based systematic review and meta-analysis that utilizes data available in the medical literature. As such, there are no individual participant data to analyze or share. The data extracted for the analysis are available in the eTables in Supplement 1. To obtain the actual datafile imported into the R statistical program for analysis, which will be shared upon request, interested researchers may also contact Dr. Mata via e-mail at [dmata@bwh.harvard.edu](mailto:dmata@bwh.harvard.edu).
